# Supplementary material for: Monitoring progress towards the first UNAIDS 90-90-90 target in key populations living with HIV in Norway
Source: BMC Infect Dis. 2020 Jun 26;20:451. doi: 10.1186/s12879-020-05178-1 (PMC7318482; doi:10.1186/s12879-020-05178-1)
Supplement: Supplementary file 3 — Additional file 3. Incidence estimates using the ECDC HIV modelling tool and CSAVR. [file 12879_2020_5178_MOESM3_ESM.xlsx]

## Sheet: Incidence_ECDC_defaultCD4
	Point estimate	Lower 95%CI	Upper 95%CI
1980	24.634	18.1916	29.9313
1981	64.2736	49.6955	76.7911
1982	91.047	74.3397	106.295
1983	107.056	92.7357	121.23
1984	114.401	104.146	126.362
1985	115.186	107.269	124.418
1986	111.511	102.228	121.528
1987	105.479	92.2974	118.945
1988	99.056	84.0627	114.28
1989	93.3665	78.295	108.951
1990	88.9863	74.7126	103.405
1991	86.4656	74.0529	97.9733
1992	86.3542	76.5562	95.2129
1993	89.2021	80.9407	99.6045
1994	95.5593	84.6018	106.169
1995	105.974	93.5871	119.297
1996	120.702	108.468	134.735
1997	138.884	126.839	150.082
1998	159.196	148.527	171.443
1999	180.305	170.151	193.416
2000	200.878	188.855	213.837
2001	219.579	204.855	232.111
2002	235.077	219.284	250.418
2003	246.048	230.473	262.763
2004	251.684	237.614	267.432
2005	252.408	240.398	267.599
2006	248.97	238.48	262.788
2007	242.119	231.137	253.932
2008	232.605	220.297	245.098
2009	221.179	208.107	237.206
2010	208.589	194.447	226.515
2011	195.568	181.688	214.867
2012	182.428	168.457	201.096
2013	168.843	155.353	184.804
2014	154.383	142.237	168.819
2015	138.619	125.852	152.572
2016	121.121	100.052	145.012
2017	101.462	67.0928	137.321
2018	79.2106	33.5493	128.89

## Sheet: Incidence_ CSAVR
	Point estimate	Lower uncertainty bound	Upper uncertainty bound
1970	0	0	0
1971	0	0	0
1972	1	1	1
1973	3	3	4
1974	11	9	13
1975	27	22	31
1976	47	38	55
1977	67	55	78
1978	81	67	95
1979	89	74	104
1980	88	74	104
1981	84	70	99
1982	81	68	95
1983	78	67	92
1984	77	66	91
1985	77	66	90
1986	77	66	90
1987	78	68	91
1988	81	70	93
1989	84	73	95
1990	88	77	99
1991	93	82	104
1992	99	87	110
1993	106	94	117
1994	114	101	126
1995	124	110	136
1996	135	119	148
1997	145	128	160
1998	155	137	171
1999	164	144	182
2000	172	150	192
2001	180	155	201
2002	186	159	210
2003	192	164	217
2004	197	166	224
2005	201	169	230
2006	204	172	234
2007	207	175	239
2008	209	177	240
2009	210	178	241
2010	210	177	241
2011	209	175	240
2012	206	172	237
2013	203	168	235
2014	198	163	229
2015	192	158	223
2016	184	151	216
2017	175	143	206
2018	165	135	195
