# Supplementary material for: Monitoring progress towards the first UNAIDS 90-90-90 target in key populations living with HIV in Norway
Source: BMC Infect Dis. 2020 Jun 26;20:451. doi: 10.1186/s12879-020-05178-1 (PMC7318482; doi:10.1186/s12879-020-05178-1)
Supplement: Supplementary file 4 — Additional file 4. PLHIV estimates using the ECDC HIV modelling tool, Spectrum AIDS Impact Model (with CSAVR incidence) and Spectrum AIDS Impact Model (with ECDC modelling tool incidence). [file 12879_2020_5178_MOESM4_ESM.xlsx]

## Sheet: PLHIV_ECDC
	Point estimate	Lower 95%CI	Upper 95%CI
1980	24.6316	18.1898	29.9284
1981	88.8755	67.8631	106.666
1982	179.818	142.123	213.06
1983	284.64	232.675	332.162
1984	398.681	337.872	457.029
1985	502.398	439.686	566.187
1986	593.3	533.435	662.406
1987	664.095	600.824	734.531
1988	729.5	669.228	795.535
1989	789.254	729.109	860.637
1990	830.67	769.207	907.83
1991	871.605	810.304	949.473
1992	892.463	823.295	975.151
1993	912.199	836.413	996.319
1994	944.312	864.926	1026.85
1995	984.851	904.807	1076.85
1996	1048.12	965.074	1145.01
1997	1159.55	1075.48	1255.25
1998	1286.28	1198.75	1383.36
1999	1445.07	1356.88	1550.69
2000	1615.39	1523.73	1733.31
2001	1812.35	1715.38	1942.07
2002	2030.76	1925.08	2170.24
2003	2262.07	2148.08	2403.89
2004	2505.96	2383.45	2646.01
2005	2748.53	2616.82	2896.3
2006	2992.63	2850.75	3148.53
2007	3226.85	3073.73	3391.19
2008	3449.55	3284.18	3622.48
2009	3657.82	3479.45	3835.35
2010	3860.53	3679.77	4042.58
2011	4044.23	3869.2	4231.05
2012	4223.84	4046.87	4415.71
2013	4385.89	4207.67	4583.19
2014	4535.53	4357.48	4738.68
2015	4671.46	4495.04	4880.26
2016	4788.95	4615.1	4993.76
2017	4885.83	4717.45	5087.46
2018	4963.51	4788.99	5181.14

## Sheet: PLHIV_Spectrum_CSAVR incidence
	Point estimate	Lower uncertainty bound	Upper uncertainty bound
1970	0	0	0
1971	0	0	0
1972	1	1	1
1973	4	3	5
1974	15	12	17
1975	41	34	48
1976	88	72	102
1977	153	125	177
1978	232	190	267
1979	316	260	365
1980	396	329	459
1981	468	391	542
1982	532	450	621
1983	589	498	689
1984	639	540	745
1985	683	580	797
1986	722	612	842
1987	758	637	882
1988	791	663	922
1989	822	689	957
1990	854	715	994
1991	887	744	1032
1992	923	778	1071
1993	963	813	1114
1994	1008	853	1161
1995	1061	903	1218
1996	1131	972	1292
1997	1247	1076	1413
1998	1380	1205	1556
1999	1524	1320	1710
2000	1674	1463	1884
2001	1830	1601	2044
2002	1990	1748	2229
2003	2156	1896	2402
2004	2326	2032	2587
2005	2503	2169	2779
2006	2688	2324	2985
2007	2881	2490	3205
2008	3078	2654	3428
2009	3278	2818	3655
2010	3488	2990	3891
2011	3701	3166	4136
2012	3913	3345	4381
2013	4127	3545	4632
2014	4335	3727	4870
2015	4532	3903	5104
2016	4714	4066	5318
2017	4880	4222	5524
2018	5030	4360	5701

## Sheet: PLHIV_Spectrum_ECDC incidence
	Point estimate	Lower uncertainty bound	Upper uncertainty bound
1980	25	20	31
1981	89	73	110
1982	179	150	217
1983	283	244	333
1984	393	345	452
1985	500	449	574
1986	598	541	681
1987	684	620	785
1988	757	682	877
1989	818	725	954
1990	866	757	1013
1991	904	783	1069
1992	935	807	1112
1993	963	833	1147
1994	993	858	1182
1995	1028	890	1224
1996	1086	944	1285
1997	1196	1054	1395
1998	1334	1185	1537
1999	1494	1351	1711
2000	1674	1521	1903
2001	1870	1706	2096
2002	2080	1911	2314
2003	2299	2117	2554
2004	2524	2331	2791
2005	2751	2547	3026
2006	2980	2772	3278
2007	3207	2988	3533
2008	3428	3195	3769
2009	3640	3390	3991
2010	3849	3576	4211
2011	4051	3759	4437
2012	4241	3929	4648
2013	4422	4085	4848
2014	4588	4245	5030
2015	4732	4372	5186
2016	4849	4461	5332
2017	4940	4508	5452
2018	5002	4506	5555
