# Supplementary material for: Monitoring progress towards the first UNAIDS 90-90-90 target in key populations living with HIV in Norway
Source: BMC Infect Dis. 2020 Jun 26;20:451. doi: 10.1186/s12879-020-05178-1 (PMC7318482; doi:10.1186/s12879-020-05178-1)
Supplement: Supplementary file 5 — Additional file 5. All estimates from the ECDC HIV modelling tool, overall and by key subpopulation, using default model assumptions on CD4 distribution. [file 12879_2020_5178_MOESM5_ESM.xlsx]

## Sheet: Overall_defaultCD4
year	N_HIV_D	N_HIV_Obs_M	N_CD4_1_D	N_CD4_2_D	N_CD4_3_D	N_CD4_4_D	N_CD4_1_Obs_M	N_CD4_2_Obs_M	N_CD4_3_Obs_M	N_CD4_4_Obs_M	N_AIDS_D	N_AIDS_M	N_HIVAIDS_D	N_HIVAIDS_Obs_M	N_Inf_M	t_diag	t_diag_p50	t_diag_p25	t_diag_p75	D_Avg_Time	N_Alive	N_Alive_Diag_M	N_Und	N_Und_Alive_p	N_Und_CD4_3_M	N_Und_CD4_4_M	N_Und_CD4_3p4_M	N_HIV_Obs_M_LB	N_HIV_Obs_M_UB	N_CD4_1_Obs_M_LB	N_CD4_1_Obs_M_UB	N_CD4_2_Obs_M_LB	N_CD4_2_Obs_M_UB	N_CD4_3_Obs_M_LB	N_CD4_3_Obs_M_UB	N_CD4_4_Obs_M_LB	N_CD4_4_Obs_M_UB	N_AIDS_M_LB	N_AIDS_M_UB	N_HIVAIDS_Obs_M_LB	N_HIVAIDS_Obs_M_UB	N_Inf_M_LB	N_Inf_M_UB	N_Alive_LB	N_Alive_UB	N_Alive_Diag_M_LB	N_Alive_Diag_M_UB	N_Und_LB	N_Und_UB
1980	0	0.054161	0	0	0	0	0	0	0	0	0	0.054161	0	0.054161	24.634	11.5671	10.8755	6.3895	17.2385	0.5	24.6316	0.054161	24.5775	99.7801	2.68069	0.617528	3.29822	0.039472	0.066319	0	0	0	0	0	0	0	0	0.039472	0.066319	0.039472	0.066319	18.1916	29.9313	18.1898	29.9284	0.039472	0.066319	18.1503	29.862
1981	0	0.675973	0	0	0	0	0	0	0	0	0	0.675973	0	0.675973	64.2736	11.5671	10.8755	6.3895	17.2385	1.15409	88.8755	0.730134	88.1453	99.1785	12.855	3.5072	16.3622	0.50394	0.818188	0	0	0	0	0	0	0	0	0.50394	0.818188	0.50394	0.818188	49.6955	76.7911	67.8631	106.666	0.543412	0.884251	67.3197	105.782
1982	0	2.37325	0	0	0	0	0	0	0	0	0	2.37325	0	2.37325	91.047	11.5671	10.8755	6.3895	17.2385	1.66703	179.818	3.10339	176.714	98.2741	29.6982	9.26864	38.9668	1.81625	2.84594	0	0	0	0	0	0	0	0	1.81625	2.84594	1.81625	2.84594	74.3397	106.295	142.123	213.06	2.35967	3.73019	139.763	209.33
1983	0	5.28779	0	0	0	0	0	0	0	0	2	5.28779	0	5.28779	107.056	11.5671	10.8755	6.3895	17.2385	2.17933	284.64	6.39117	278.249	97.7546	51.5184	17.9438	69.4623	4.15953	6.27643	0	0	0	0	0	0	0	0	4.15953	6.27643	4.15953	6.27643	92.7357	121.23	232.675	332.162	4.5192	8.00663	228.156	324.127
1984	13	15.3705	0	0	0	0	0	0	0	0	4	9.62738	3	8.18096	114.401	10.9265	9.7045	5.4855	15.6555	2.69654	398.681	21.7616	376.919	94.5416	76.6234	22.7013	99.3247	0.161909	41.083	0	0	0	0	0	0	0	0	7.75742	11.3291	6.7621	9.38349	104.146	126.362	337.872	457.029	5.24971	48.2084	324.8	420.975
1985	207	19.9963	0	0	0	0	0	0	0	0	14	14.7996	15	10.646	115.186	10.9265	9.7045	5.4855	15.6555	3.16072	502.398	30.758	471.64	93.8778	103.07	29.7974	132.867	4e-05	50.1229	0	0	0	0	0	0	0	0	12.2566	17.1969	8.90175	12.0115	107.269	124.418	439.686	566.187	-5.66146	88.241	408.777	523.785
1986	188	25.9781	0	0	0	0	0	0	0	0	21	20.6732	8	13.8075	111.511	10.9265	9.7045	5.4855	15.6555	3.64558	593.3	36.7361	556.564	93.8082	129.23	37.888	167.118	1.58083	58.9838	0	0	0	0	0	0	0	0	17.6067	23.7029	11.5167	15.6858	102.228	121.528	533.435	662.406	-24.0806	127.225	484.698	620.454
1987	183	155.301	0	0	0	0	0	0	0	0	35	27.3312	13	15.499	105.479	3.46407	2.6545	1.2805	4.8595	3.63747	664.095	158.037	506.058	76.2026	121.637	36.323	157.96	136.43	172.545	0	0	0	0	0	0	0	0	24.0696	30.694	13.0359	17.8265	92.2974	118.945	600.824	734.531	101.979	245.4	445.541	559.347
1988	135	142.523	0	0	0	0	0	0	0	0	25	33.8988	14	14.7777	99.056	3.46407	2.6545	1.2805	4.8595	3.9915	729.5	267.56	461.94	63.3228	113.269	34.273	147.542	130.11	153.736	0	0	0	0	0	0	0	0	30.6406	37.6532	12.5041	16.774	84.0627	114.28	669.228	795.535	211.11	354.499	407.331	508.82
1989	124	130.927	0	0	0	0	0	0	0	0	41	40.2424	9	13.8807	93.3665	3.46407	2.6545	1.2805	4.8595	4.25693	789.254	365.487	423.767	53.6921	104.945	32.0236	136.969	121.138	139.144	0	0	0	0	0	0	0	0	36.8189	44.2288	12.0725	15.7282	78.295	108.951	729.109	860.637	311.246	450.233	379.919	476.163
1990	84	120.651	0	0	0	0	0	0	0	0	58	46.1911	9	12.9418	88.9863	3.46407	2.6545	1.2805	4.8595	4.44343	830.67	439.138	391.532	47.1345	97.2141	29.7954	127.009	111.352	128.832	0	0	0	0	0	0	0	0	42.526	50.0459	11.2588	14.6084	74.7126	103.405	769.207	907.83	387.809	517.914	349.18	444.049
1991	130	111.864	0	0	0	0	0	0	0	0	56	51.6198	18	12.0416	86.4656	3.46407	2.6545	1.2805	4.8595	4.55733	871.605	506.002	365.602	41.9459	90.4594	27.7497	118.209	101.936	120.052	0	0	0	0	0	0	0	0	48.4494	55.2699	10.374	13.7637	74.0529	97.9733	810.304	949.473	448.867	577.983	324.632	413.947
1992	97	104.78	0	0	0	0	0	0	0	0	51	56.4761	13	11.2393	86.3542	3.46407	2.6545	1.2805	4.8595	4.60121	892.463	545.782	346.681	38.8454	84.9887	26.0087	110.997	95.7274	113.185	0	0	0	0	0	0	0	0	52.8155	60.8686	9.61727	12.9374	76.5562	95.2129	823.295	975.151	488.417	611.184	307.87	393.235
1993	105	99.6665	0	0	0	0	0	0	0	0	63	60.7806	15	10.5825	89.2021	3.46407	2.6545	1.2805	4.8595	4.57507	912.199	576.449	335.75	36.8067	81.0856	24.674	105.76	91.7826	107.018	0	0	0	0	0	0	0	0	57.4275	65.0456	9.02543	12.1377	80.9407	99.6045	836.413	996.319	517.931	645.308	299.645	378.447
1994	84	96.8424	0	0	0	0	0	0	0	0	73	64.6202	15	10.1113	95.5593	3.46407	2.6545	1.2805	4.8595	4.47968	944.312	610.291	334.021	35.3719	79.0406	23.8393	102.88	88.2203	104.727	0	0	0	0	0	0	0	0	60.717	68.9999	8.62725	11.603	84.6018	106.169	864.926	1026.85	549.363	682.684	299.783	370.37
1995	99	96.6737	0	0	0	0	0	0	0	0	67	68.1443	10	9.86439	105.974	3.46407	2.6545	1.2805	4.8595	4.32109	984.851	641.965	342.886	34.8161	79.1638	23.5985	102.762	89.753	103.627	0	0	0	0	0	0	0	0	63.7173	72.4999	8.44777	11.3103	93.5871	119.297	904.807	1076.85	577.261	718.368	308.907	372.234
1996	105	99.9872	0	0	0	0	0	0	0	0	54	71.5597	14	9.87788	120.702	3.46407	2.6545	1.2805	4.8595	4.11226	1048.12	684.952	363.166	34.6493	81.653	24.0109	105.664	93.4616	108.28	0	0	0	0	0	0	0	0	66.8035	76.1594	8.51019	11.1855	108.468	134.735	965.074	1145.01	615.141	765.326	329.008	395.198
1997	106	106.989	0	0	0	0	0	0	0	0	35	75.1124	10	10.1679	138.884	3.43641	2.6315	1.2695	4.8185	3.8817	1159.55	764.941	394.612	34.0314	86.5681	25.1055	111.674	99.9257	115.72	0	0	0	0	0	0	0	0	70.2369	79.7618	8.97024	11.3014	126.839	150.082	1075.48	1255.25	690.965	848.994	358.901	427.027
1998	86	117.252	0	0	0	0	0	0	0	0	36	79.0543	17	10.7441	159.196	3.40919	2.6095	1.2595	4.7785	3.66284	1286.28	850.192	436.083	33.9028	93.8256	26.8816	120.707	109.208	126.564	0	0	0	0	0	0	0	0	74.2676	83.9216	9.55237	11.7063	148.527	171.443	1198.75	1383.36	772.373	938.28	398.17	466.47
1999	140	130.484	0	0	0	0	0	0	0	0	29	83.6154	13	11.5943	180.305	3.38241	2.5875	1.2495	4.7395	3.48197	1445.07	959.676	485.394	33.5896	103.104	29.2718	132.375	121.968	139.411	0	0	0	0	0	0	0	0	79.11	88.6296	10.3395	12.4267	170.151	193.416	1356.88	1550.69	876.722	1048.5	443.59	519.987
2000	162	146.095	0	0	0	0	0	0	0	0	35	88.9779	19	12.6798	200.878	3.35606	2.5665	1.2405	4.7015	3.35105	1615.39	1075.77	539.618	33.4048	113.887	32.1504	146.037	137.55	155.271	0	0	0	0	0	0	0	0	84.4835	93.8146	11.414	13.5973	188.855	213.837	1523.73	1733.31	988.228	1167.08	493.409	578.548
2001	144	163.263	0	0	0	0	0	0	0	0	33	95.2587	10	13.9403	219.579	3.33013	2.5445	1.2305	4.6635	3.27002	1812.35	1217.03	595.319	32.8479	125.512	35.3448	160.857	155.036	172.695	0	0	0	0	0	0	0	0	90.8596	100.283	12.5148	14.9948	204.855	232.111	1715.38	1942.07	1125.55	1320.41	548.148	635.307
2002	187	180.986	0	0	0	0	0	0	0	0	34	102.492	13	15.2963	235.077	3.3046	2.5245	1.2215	4.6255	3.23273	2030.76	1382.02	648.736	31.9455	137.213	38.6465	175.859	172.199	193.094	0	0	0	0	0	0	0	0	97.9383	108.209	13.6883	16.4801	219.284	250.418	1925.08	2170.24	1287.35	1498.94	596.891	694.295
2003	217	198.133	0	0	0	0	0	0	0	0	53	110.623	15	16.6568	246.048	3.27948	2.5035	1.2115	4.5885	3.23149	2262.07	1566.15	695.917	30.7646	148.152	41.8227	189.975	188.156	210.009	0	0	0	0	0	0	0	0	105.887	116.695	14.9604	17.9545	230.473	262.763	2148.08	2403.89	1469.13	1697.77	637.734	740.747
2004	237	213.499	27	14	33	31	40.0749	20.557	20.2884	14.1513	36	119.501	21	17.9234	251.684	3.25474	2.4835	1.2025	4.5525	3.25947	2505.96	1772.65	733.311	29.2626	157.503	44.6359	202.139	202.306	225.75	34.9239	47.788	17.9085	24.5837	17.7821	23.961	12.4438	16.9343	114.335	125.999	16.1636	19.3126	237.614	267.432	2383.45	2646.01	1674.2	1912.68	673.964	779.041
2005	198	226.047	27	20	23	19	41.1204	21.1898	21.0499	14.6558	32	128.892	10	19.0021	252.408	3.23038	2.4645	1.1945	4.5165	3.30993	2748.53	1989.7	758.834	27.6087	164.648	46.8914	211.539	214.129	238.966	36.2436	46.6908	18.6785	24.1115	18.4176	24.034	12.3397	16.7835	123.559	135.129	17.2208	20.4553	240.398	267.599	2616.82	2896.3	1890.84	2135.47	700.431	806.259
2006	240	235.136	26	18	16	25	34.5476	17.8919	17.9126	12.4597	32	138.513	19	19.825	248.97	3.2064	2.4455	1.1855	4.4815	3.37585	2992.63	2220.83	771.794	25.7898	169.24	48.4633	217.704	223.074	249.001	28.8702	41.4753	14.9523	21.3978	15.0016	21.2673	10.4123	14.7133	132.642	145.07	18.0751	21.4203	238.48	262.788	2850.75	3148.53	2120.41	2375.18	716.491	824.046
2007	228	240.496	45	25	36	31	56.3392	29.3257	29.6074	20.5831	11	148.053	6	20.3505	242.119	3.18278	2.4265	1.1765	4.4475	3.45122	3226.85	2454.33	772.52	23.9404	171.178	49.2936	220.471	229.553	253.367	48.8075	62.6101	25.4051	32.4971	25.639	32.8641	17.6055	23.1943	141.499	154.93	18.6345	21.9091	231.137	253.932	3073.73	3391.19	2346.25	2621.38	718.679	826.697
2008	266	242.154	53	42	52	37	67.4998	35.3081	35.9527	24.9832	19	157.208	17	20.5657	232.605	3.15952	2.4075	1.1685	4.4135	3.53134	3449.55	2687.48	762.065	22.0917	170.549	49.3829	219.932	232.65	254.168	60.0713	75.1998	31.6995	39.3111	32.3403	39.8406	21.4567	27.3099	150.209	164.504	18.6219	22.2196	220.297	245.098	3284.18	3622.48	2574.51	2863.91	702.331	815.715
2009	258	240.36	51	56	47	53	77.7302	40.8472	41.9412	29.1281	19	165.692	18	20.4796	221.179	3.1366	2.3895	1.1605	4.3795	3.61265	3657.82	2915.84	741.98	20.2847	167.591	48.7797	216.371	231.055	251.43	72.2827	84.1453	38.2945	44.123	39.6034	45.0979	26.4851	31.2271	158.291	173.413	18.3147	22.3393	208.107	237.206	3479.45	3835.35	2800.73	3097.62	677.303	795.635
2010	236	235.53	53	38	46	50	75.68	39.9376	41.332	28.6811	24	173.258	19	20.1184	208.589	3.11403	2.3705	1.1515	4.3465	3.69234	3860.53	3146.37	714.153	18.4989	162.647	47.5682	210.216	225.069	246.424	70.2473	82.6844	37.4221	43.2369	38.5746	43.9902	25.7971	31.0751	165.445	180.883	17.7645	22.1889	194.447	226.515	3679.77	4042.58	3029.09	3328.34	648.606	768.127
2011	234	228.202	54	53	35	59	75.6415	40.0658	41.7657	28.9466	19	179.711	9	19.5235	195.568	3.09179	2.3535	1.1445	4.3145	3.76789	4044.23	3363.58	680.658	16.8303	156.133	45.8581	201.991	217.049	241.348	70.4384	83.0963	37.2816	43.708	39.1121	44.72	25.7521	31.2626	171.481	187.187	17.0172	21.579	181.688	214.867	3869.2	4231.05	3235.6	3543.29	609.32	739.246
2012	198	218.971	51	25.5882	28	26	60.3823	32.084	33.66	23.289	25	184.911	23	18.7409	182.428	3.06988	2.3355	1.1365	4.2825	3.83712	4223.84	3580.55	643.289	15.23	148.465	43.7671	192.232	207.351	234.747	55.2718	67.5631	29.3606	35.4729	30.8759	36.9979	20.9415	26.0159	177.166	192.209	16.1421	20.7376	168.457	201.096	4046.87	4415.71	3441.85	3761.75	570.266	704.404
2013	196	208.316	46	37	39	38	70.551	37.5874	39.655	27.3781	29	188.773	22	17.8175	168.843	3.04829	2.3185	1.1285	4.2505	3.89972	4385.89	3782.86	603.029	13.7493	139.947	41.3906	181.338	196.545	225.199	65.1864	77.1327	34.9339	40.5385	36.8977	42.5747	24.045	30.229	181.365	195.919	15.1288	19.9335	155.353	184.804	4207.67	4583.19	3633.68	3964	530.748	664.383
2014	193	196.495	52	39	41	19	64.8524	34.6381	36.7318	25.3002	18	191.248	25	16.7877	154.383	3.02701	2.3015	1.1205	4.2195	3.95824	4535.53	3975.36	560.177	12.3508	130.747	38.791	169.538	184.165	211.866	59.4943	71.9339	32.2443	37.999	34.3328	39.9536	22.5515	27.7848	184.001	198.371	14.0667	19.0177	142.237	168.819	4357.48	4738.68	3816.21	4162.29	489.247	622.679
2015	175	183.564	46	31	32	37	64.1109	34.3377	36.6058	25.1578	11	192.311	22	15.6708	138.619	3.00603	2.2845	1.1135	4.1895	4.01781	4671.46	4156.92	514.54	11.0145	120.919	35.9983	156.917	171.206	197.645	58.6448	70.199	31.3971	37.3483	33.7109	39.3191	22.4748	27.7521	185.375	199.282	12.9991	17.9406	125.852	152.572	4495.04	4880.26	3988.68	4348.65	447.167	577.826
2016	182	169.436	56	35	39	30	60.9789	32.7789	35.1624	24.1279	16	191.948	20	14.4747	121.121	2.98536	2.2685	1.1065	4.1585	4.08604	4788.95	4323.36	465.587	9.72213	110.423	33.015	143.438	157.38	181.559	55.6399	66.164	30.3817	35.0362	32.6743	37.4326	21.1393	26.6728	185.033	198.994	11.9438	16.7366	100.052	145.012	4615.1	4993.76	4156.1	4516.14	403.276	529.621
2017	159	153.909	46	32	41	20	53.0393	28.6601	31.0006	21.2661	18	190.148	13	13.1966	101.462	2.96498	2.2525	1.0985	4.1295	4.17398	4885.83	4473.27	412.558	8.44398	99.154	29.8216	128.976	142.013	166.099	47.3794	58.9066	26.0178	31.2967	28.3667	33.6128	18.2883	24.0423	183.249	197.073	10.8356	15.4139	67.0928	137.321	4717.45	5087.46	4309.83	4665.18	345.678	493.808
2018	130	136.704	35	20	27	26	44.0596	23.9987	26.2739	18.0584	12	186.89	10	11.8252	79.2106	2.94489	2.2365	1.0915	4.0995	4.29881	4963.51	4608.97	354.544	7.14299	86.9592	26.3827	113.342	116.87	155.149	35.2424	51.9936	19.7581	27.6604	22.3915	29.337	14.7582	21.0455	180.473	193.737	9.57301	14.0657	33.5493	128.89	4788.99	5181.14	4448.5	4801.64	258.605	448.993
[truncated: 26 more columns]

## Sheet: MSM_Norwegian_defaultCD4
year	N_HIV_D	N_HIV_Obs_M	N_CD4_1_D	N_CD4_2_D	N_CD4_3_D	N_CD4_4_D	N_CD4_1_Obs_M	N_CD4_2_Obs_M	N_CD4_3_Obs_M	N_CD4_4_Obs_M	N_AIDS_D	N_AIDS_M	N_HIVAIDS_D	N_HIVAIDS_Obs_M	N_Inf_M	t_diag	t_diag_p50	t_diag_p25	t_diag_p75	D_Avg_Time	N_Alive	N_Alive_Diag_M	N_Und	N_Und_Alive_p	N_Und_CD4_3_M	N_Und_CD4_4_M	N_Und_CD4_3p4_M	N_HIV_Obs_M_LB	N_HIV_Obs_M_UB	N_CD4_1_Obs_M_LB	N_CD4_1_Obs_M_UB	N_CD4_2_Obs_M_LB	N_CD4_2_Obs_M_UB	N_CD4_3_Obs_M_LB	N_CD4_3_Obs_M_UB	N_CD4_4_Obs_M_LB	N_CD4_4_Obs_M_UB	N_AIDS_M_LB	N_AIDS_M_UB	N_HIVAIDS_Obs_M_LB	N_HIVAIDS_Obs_M_UB	N_Inf_M_LB	N_Inf_M_UB	N_Alive_LB	N_Alive_UB	N_Alive_Diag_M_LB	N_Alive_Diag_M_UB	N_Und_LB	N_Und_UB
1980	0	0.036399	0	0	0	0	0	0	0	0	0	0.036399	0	0.036399	16.5101	11.5671	10.8755	6.3895	17.2385	0.5	16.5085	0.036399	16.4721	99.7795	1.79856	0.414415	2.21297	0.02806	0.048293	0	0	0	0	0	0	0	0	0.02806	0.048293	0.02806	0.048293	12.8338	21.7724	12.8326	21.7703	0.02806	0.048293	12.8045	21.722
1981	0	0.452085	0	0	0	0	0	0	0	0	0	0.452085	0	0.452085	42.6178	11.5671	10.8755	6.3895	17.2385	1.15581	59.1064	0.488484	58.6179	99.1736	8.56555	2.33912	10.9047	0.353541	0.593536	0	0	0	0	0	0	0	0	0.353541	0.593536	0.353541	0.593536	34.1239	54.9628	46.9408	76.7069	0.381601	0.641829	46.5592	76.065
1982	0	1.57725	0	0	0	0	0	0	0	0	0	1.57725	0	1.57725	59.4447	11.5671	10.8755	6.3895	17.2385	1.67175	118.482	2.06574	116.416	98.2565	19.6253	6.13769	25.763	1.25444	2.04466	0	0	0	0	0	0	0	0	1.25444	2.04466	1.25444	2.04466	49.3692	74.4641	96.2548	151.081	1.63604	2.68649	94.6187	148.394
1983	0	3.48802	0	0	0	0	0	0	0	0	2	3.48802	0	3.48802	68.4412	11.5671	10.8755	6.3895	17.2385	2.18958	184.769	3.55376	181.215	98.0766	33.7098	11.7841	45.4939	2.8247	4.4589	0	0	0	0	0	0	0	0	2.8247	4.4589	2.8247	4.4589	58.2942	82.7331	153.396	231.617	2.46075	5.14539	150.935	226.472
1984	11	46.5213	0	0	0	0	0	0	0	0	4	6.39641	3	4.90023	71.0577	3.88332	3.0015	1.4405	5.4765	2.36619	255.611	50.075	205.535	80.4096	41.2005	12.1662	53.3667	26.7748	68.6652	0	0	0	0	0	0	0	0	5.3445	8.05965	3.74756	6.18624	62.8102	82.8898	216.29	313.573	29.6017	73.1043	155.987	251.958
1985	92	51.697	0	0	0	0	0	0	0	0	10	9.75186	11	5.27944	68.7446	3.88332	3.0015	1.4405	5.4765	2.71306	317.122	94.772	222.35	70.115	47.0467	13.424	60.4708	32.0844	72.3078	0	0	0	0	0	0	0	0	8.21428	12.0873	3.759	6.76625	61.3683	76.2602	270.201	381.691	54.6861	138.412	164.807	275.842
1986	62	55.4962	0	0	0	0	0	0	0	0	15	13.4677	7	5.80408	62.9525	3.88332	3.0015	1.4405	5.4765	3.04103	368.819	139.268	229.551	62.2394	50.8115	14.5832	65.3947	36.9297	73.0045	0	0	0	0	0	0	0	0	11.4377	16.4005	3.6932	7.60207	55.838	69.5616	319.795	435.146	80.6158	201.791	156.569	282.912
1987	61	43.4295	0	0	0	0	0	0	0	0	27	17.2602	7	6.39737	55.1316	4.97066	3.9445	1.8945	7.0805	3.42104	409.668	168.698	240.971	58.8209	55.8634	16.3277	72.1911	33.5868	54.4308	0	0	0	0	0	0	0	0	14.8018	20.6142	4.01632	8.37316	46.7573	63.5641	359.874	476.479	113.07	231.321	185.659	285.449
1988	39	45.7278	0	0	0	0	0	0	0	0	16	20.9461	6	7.02222	46.638	4.97066	3.9445	1.8945	7.0805	3.79578	441.997	200.426	241.571	54.6545	58.5306	17.4868	76.0174	38.6036	53.63	0	0	0	0	0	0	0	0	18.3186	24.532	4.90807	8.96338	37.4143	55.7391	391.149	501.736	148.24	261.41	199.704	281.126
1989	40	46.1586	0	0	0	0	0	0	0	0	26	24.3058	5	7.39318	38.2312	4.97066	3.9445	1.8945	7.0805	4.20067	462.902	229.584	233.318	50.4033	58.9495	18.0057	76.9552	40.4256	50.9783	0	0	0	0	0	0	0	0	21.4838	28.0709	5.60916	9.21717	28.498	46.8383	409.806	520.467	173.656	292.446	187.82	276.284
1990	31	44.9774	0	0	0	0	0	0	0	0	27	27.1773	4	7.50021	30.2851	4.97066	3.9445	1.8945	7.0805	4.6322	470.856	252.562	218.295	46.3612	57.4051	17.9126	75.3176	39.7938	48.7288	0	0	0	0	0	0	0	0	24.2324	30.6922	5.80363	9.15991	21.2655	38.492	415.368	530.999	195.16	315.258	172.235	259.509
1991	52	42.5084	0	0	0	0	0	0	0	0	29	29.452	12	7.36511	23.1547	4.97066	3.9445	1.8945	7.0805	5.09109	472.686	274.07	198.616	42.0186	54.2774	17.2871	71.5645	37.773	45.687	0	0	0	0	0	0	0	0	26.4564	32.7951	5.63662	8.9756	15.7318	30.3138	416.382	535.466	216.75	336.432	156.302	239.098
1992	24	39.1109	0	0	0	0	0	0	0	0	23	31.0716	4	7.0272	17.1953	4.97066	3.9445	1.8945	7.0805	5.57896	460.572	284.181	176.391	38.2982	50.0079	16.2416	66.2495	34.5322	43.0927	0	0	0	0	0	0	0	0	28.0758	34.458	5.33788	8.74851	9.96581	23.848	401.361	518.99	226.427	346.111	138.529	213.551
1993	35	35.1639	0	0	0	0	0	0	0	0	37	32.0278	9	6.53709	12.7618	4.97066	3.9445	1.8945	7.0805	6.09391	441.045	287.345	153.701	34.8492	45.074	14.9091	59.9831	30.7997	39.7744	0	0	0	0	0	0	0	0	28.9867	35.5015	4.96083	8.16889	6.76858	18.5682	381.525	498.408	229.071	348.995	120.131	185.801
1994	31	31.0553	0	0	0	0	0	0	0	0	33	32.3595	6	5.95265	10.2096	4.97066	3.9445	1.8945	7.0805	6.62247	422.993	290.4	132.593	31.3463	39.9722	13.4351	53.4073	26.5266	35.6915	0	0	0	0	0	0	0	0	29.2019	35.3685	4.50583	7.5195	4.44389	16.016	362.314	482.168	231.848	351.699	105.441	165.803
1995	35	27.1759	0	0	0	0	0	0	0	0	35	32.1488	6	5.33573	9.89271	4.97066	3.9445	1.8945	7.0805	7.12495	406.65	291.576	115.074	28.2981	35.2068	11.9717	47.1786	22.6791	31.7419	0	0	0	0	0	0	0	0	29.0661	35.1127	3.98635	6.86351	2.75962	15.7231	343.582	468.242	233.198	352.938	92.688	141.975
1996	27	24.5939	0	0	0	0	0	0	0	0	25	31.519	6	4.74164	12.0226	4.97066	3.9445	1.8945	7.0805	7.4969	387.464	285.17	102.294	26.4009	31.0521	10.597	41.6491	20.2341	28.3498	0	0	0	0	0	0	0	0	28.4967	34.4697	3.53857	6.08452	4.4427	17.9983	325.096	451.728	225.049	346.89	80.9706	127.737
1997	29	23.2784	0	0	0	0	0	0	0	0	12	30.6218	4	4.19609	16.264	4.70395	3.7085	1.7775	6.6865	7.60321	395.543	300.448	95.0943	24.0415	27.8014	9.40713	37.2085	19.3	27.4693	0	0	0	0	0	0	0	0	27.7678	33.6924	3.17983	5.32291	9.09452	22.1107	334.091	461.498	239.01	362.832	75.7845	120.992
1998	18	22.8341	0	0	0	0	0	0	0	0	9	29.6165	5	3.75366	22.0548	4.46399	3.4985	1.6755	6.3325	7.32955	408.432	314.282	94.1496	23.0515	25.8138	8.53971	34.3535	18.4893	27.0657	0	0	0	0	0	0	0	0	26.7346	32.7538	2.85936	4.81816	15.608	27.7949	347.749	475.899	252.2	377.648	73.8223	117.441
1999	26	23.6456	0	0	0	0	0	0	0	0	9	28.6628	4	3.46006	28.8278	4.24711	3.3105	1.5855	6.0125	6.68276	436.107	336.928	99.1793	22.7419	25.2157	8.06563	33.2814	19.7613	27.7488	0	0	0	0	0	0	0	0	25.7909	31.8851	2.62251	4.42596	23.4638	34.709	375.786	504.035	274.703	401.509	79.8623	121.132
2000	25	25.8887	0	0	0	0	0	0	0	0	7	27.9042	3	3.33324	36.0158	4.05023	3.1425	1.5065	5.7225	5.83921	467.976	358.817	109.159	23.3258	25.9234	7.98969	33.913	21.3516	30.2539	0	0	0	0	0	0	0	0	25.1191	31.1063	2.62493	4.21542	30.3707	42.8721	402.561	540.088	296.768	424.696	91.7115	130.07
2001	29	29.5207	0	0	0	0	0	0	0	0	6	27.4571	4	3.3646	43.0517	3.87081	2.9915	1.4355	5.4575	5.0265	506.879	384.337	122.542	24.1758	27.6848	8.25994	35.9447	25.5452	34.1392	0	0	0	0	0	0	0	0	24.7099	30.5699	2.69716	4.17442	37.0331	49.0013	437.789	579.868	322.614	451.428	103.099	144.505
2002	21	34.2946	0	0	0	0	0	0	0	0	5	27.4032	1	3.52469	49.3683	3.7067	2.8545	1.3715	5.2165	4.38489	553.092	415.632	137.46	24.8531	30.1307	8.78188	38.9125	30.5065	38.9664	0	0	0	0	0	0	0	0	24.8357	30.3602	2.84622	4.2286	42.4659	56.6747	483.817	626.424	354.232	483.694	116.482	159.458
2003	42	39.7889	0	0	0	0	0	0	0	0	7	27.7839	1	3.76908	54.4025	3.55609	2.7295	1.3145	4.9945	3.94454	606.329	454.421	151.908	25.0537	32.8242	9.43417	42.2583	35.444	43.9688	0	0	0	0	0	0	0	0	25.2755	30.5275	3.06466	4.49696	47.4938	62.0369	539.202	679.784	393.234	523.121	128.179	175.71
2004	52	45.4535	10	5	7	3	8.98092	4.60517	4.6228	3.35813	9	28.5961	4	4.04482	57.7798	3.41743	2.6165	1.2625	4.7915	3.67559	662.93	498.874	164.056	24.7471	35.3239	10.0873	45.4112	40.9272	49.7624	6.46112	12.2696	3.3221	6.30244	3.33166	6.34846	2.39526	4.58219	25.8325	31.3384	3.31357	4.80869	50.4429	65.632	596.645	736.531	437.732	567.877	137.156	191.82
2005	44	50.7275	14	5	4	3	11.7656	6.0426	6.03413	4.22978	9	29.7971	1	4.30056	59.5792	3.28939	2.5115	1.2155	4.6035	3.53084	721.32	548.602	172.718	23.9447	37.2819	10.6304	47.9123	45.0799	56.1991	8.61057	15.042	4.46994	7.62384	4.56811	7.43994	3.18412	5.17166	26.8062	32.3451	3.48103	5.11333	52.7945	67.4389	653.202	795.288	487.327	617.656	144.628	202.704
2006	73	55.1659	15	9	8	5	12.1185	6.2432	6.23691	4.24431	9	31.3147	8	4.49595	59.9985	3.17084	2.4165	1.1725	4.4295	3.46681	780.12	602.768	177.352	22.734	38.4838	10.987	49.4708	49.7233	60.839	9.09021	16.0066	4.74386	8.07498	4.86925	7.77828	3.17689	5.42581	28.4829	33.9697	3.61671	5.42591	54.2185	67.4784	710.935	854.813	541.21	673.556	147.391	210.214
2007	59	58.4735	20	8	9	7	17.1788	8.88122	8.90137	5.90407	3	33.0581	1	4.60544	59.2361	3.06078	2.3285	1.1325	4.2685	3.45116	839.153	661.241	177.912	21.2013	38.8391	11.1167	49.9559	52.6648	63.7261	14.5865	20.7879	7.61509	10.5599	7.74506	10.5939	5.00577	7.12374	30.1361	35.8835	3.58555	5.60656	54.1756	65.8455	768.096	914.998	599.299	732.416	147.147	212.639
2008	71	60.4979	16	9	13	6	14.9764	7.76819	7.82023	5.06861	6	34.9276	2	4.6182	57.4904	2.95837	2.2475	1.0965	4.1195	3.46197	895.44	720.739	174.701	19.51	38.3574	11.0109	49.3684	54.5714	66.2883	11.3467	18.1416	5.92232	9.40362	5.94895	9.59981	3.73538	6.66382	31.7432	37.8569	3.52966	5.65127	51.792	63.3897	823.437	972.868	654.212	792.368	144.152	209.648
2009	60	61.2096	21	14	6	10	22.0826	11.4862	11.6152	7.36903	6	36.8217	5	4.53483	54.96	2.86286	2.1715	1.0625	3.9805	3.48508	950.2	781.949	168.251	17.7069	37.1213	10.6855	47.8068	55.4679	67.1642	18.8273	25.2967	9.82888	12.8432	9.81294	13.0253	6.09874	8.52482	33.6971	39.7724	3.4111	5.61594	48.5345	59.8284	877.627	1029.58	714.315	854.971	138.781	199.18
2010	53	60.6789	14	12	12	11	22.7375	11.8525	12.0337	7.48154	6	38.6445	2	4.36535	51.8432	2.77359	2.1025	1.0315	3.8505	3.51146	1000.85	841.628	159.223	15.9088	35.2598	10.1731	45.4329	55.3689	66.4527	19.7943	25.6562	10.4413	13.026	10.6286	13.1588	6.20054	8.81039	35.4796	41.6019	3.2356	5.44966	45.4884	57.417	928.039	1082.44	773.622	916.108	128.148	184.52
2011	67	59.0498	25	15	12	9	22.0145	11.4927	11.7055	7.13741	8	40.3108	3	4.12517	48.3333	2.68998	2.0365	1.0025	3.7295	3.53543	1047	898.677	148.324	14.1666	32.9259	9.51601	42.4419	52.8292	64.3588	19.3805	25.1455	10.1297	12.9067	10.326	12.8379	5.70181	8.38499	36.7718	43.4657	3.02275	5.17364	41.3443	54.6929	972.498	1130.85	831.001	975.313	115.976	173.658
2012	47	56.5087	17	5	5	5	17.3109	9.0449	9.23264	5.52454	6	41.7495	6	3.83265	44.5119	2.61152	1.9765	0.9755	3.6155	3.55374	1091.34	955.186	136.159	12.4762	30.2687	8.75779	39.0265	50.1152	61.1951	14.0948	20.5091	7.40773	10.4851	7.5385	10.7919	4.10267	6.88168	38.1108	44.9282	2.79017	4.84553	37.9831	51.2153	1013.09	1171.13	887.495	1034.67	104.817	161.042
2013	50	53.2159	15	8	12	7	20.4781	10.7048	10.9428	6.42978	10	42.9028	7	3.5044	40.2887	2.53777	1.9195	0.9505	3.5085	3.5669	1131.48	1008.4	123.077	10.8775	27.3977	7.93367	35.3314	46.6843	58.0676	17.6668	23.7175	9.31626	12.2101	9.53164	12.1543	5.01885	7.44385	39.363	46.1819	2.53416	4.48544	34.9766	46.8743	1054.57	1214.39	940.346	1088.56	94.2946	146.242
2014	50	49.2621	15	12	8	5	18.9988	9.93768	10.1725	5.87523	7	43.7242	9	3.15327	35.5464	2.46833	1.8665	0.9275	3.4085	3.5799	1165.89	1056.66	109.222	9.36816	24.3781	7.06712	31.4452	43.2264	54.4636	16.3271	22.1392	8.57808	11.3682	9.03298	11.188	4.66687	6.97889	40.3608	47.0704	2.24894	4.052	30.1648	41.6012	1091.09	1251.95	984.97	1138.07	83.7605	130.357
2015	36	44.671	15	9	6	3	17.6945	9.26985	9.5113	5.40845	1	44.1743	3	2.78688	30.1673	2.40283	1.8165	0.9045	3.3145	3.60202	1195.93	1101.34	94.5955	7.90978	21.2387	6.17095	27.4096	39.2431	49.93	15.0504	20.8042	8.18673	10.5499	8.22657	10.521	4.20009	6.3891	41.0589	47.6586	1.95058	3.64747	26.0685	38.0111	1121.65	1284.01	1024.21	1184.49	73.5118	114.651
2016	44	39.4151	14	14	9	4	15.2277	8.00649	8.25628	4.63429	1	44.219	2	2.40929	24.0339	2.34096	1.7695	0.8845	3.2245	3.6482	1219.86	1140.75	79.1081	6.48502	17.9822	5.24955	23.2317	34.4281	45.556	13.0215	18.2027	6.98313	9.37166	7.01266	9.43498	3.6697	5.59812	41.1989	47.5451	1.66936	3.21052	20.2229	32.8668	1143.89	1307.78	1059.93	1225.43	59.7851	98.3453
2017	34	33.4287	16	5	6	6	12.7592	6.76037	7.04446	3.91988	1	43.8259	0	2.02106	17.0288	2.28243	1.7255	0.8645	3.1405	3.74462	1236.8	1174.18	62.619	5.06299	14.5943	4.30148	18.8958	28.9592	40.393	10.7063	16.5713	5.68496	8.53508	5.97499	8.52225	3.0589	4.83496	40.7239	46.9139	1.36221	2.76117	12.8729	29.6433	1158.44	1331.26	1092.87	1265.59	46.4734	85.738
2018	27	26.6199	11	5	3	3	9.05028	4.87374	5.19002	2.88503	3	42.9628	2	1.62091	9.03437	2.22699	1.6835	0.8465	3.0615	3.94734	1245.76	1200.8	44.9621	3.60921	11.0507	3.32169	14.3724	22.1589	36.0205	6.51067	12.8894	3.53867	6.5658	3.78142	6.60185	2.02536	3.84288	40.096	45.9127	1.03605	2.33852	4.53548	25.216	1163.33	1350.54	1118.5	1291.48	29.7973	74.9823
[truncated: 26 more columns]

## Sheet: MSM_mig_defaultCD4
year	N_HIV_D	N_HIV_Obs_M	N_CD4_1_D	N_CD4_2_D	N_CD4_3_D	N_CD4_4_D	N_CD4_1_Obs_M	N_CD4_2_Obs_M	N_CD4_3_Obs_M	N_CD4_4_Obs_M	N_AIDS_D	N_AIDS_M	N_HIVAIDS_D	N_HIVAIDS_Obs_M	N_Inf_M	t_diag	t_diag_p50	t_diag_p25	t_diag_p75	D_Avg_Time	N_Alive	N_Alive_Diag_M	N_Und	N_Und_Alive_p	N_Und_CD4_3_M	N_Und_CD4_4_M	N_Und_CD4_3p4_M	N_HIV_Obs_M_LB	N_HIV_Obs_M_UB	N_CD4_1_Obs_M_LB	N_CD4_1_Obs_M_UB	N_CD4_2_Obs_M_LB	N_CD4_2_Obs_M_UB	N_CD4_3_Obs_M_LB	N_CD4_3_Obs_M_UB	N_CD4_4_Obs_M_LB	N_CD4_4_Obs_M_UB	N_AIDS_M_LB	N_AIDS_M_UB	N_HIVAIDS_Obs_M_LB	N_HIVAIDS_Obs_M_UB	N_Inf_M_LB	N_Inf_M_UB	N_Alive_LB	N_Alive_UB	N_Alive_Diag_M_LB	N_Alive_Diag_M_UB	N_Und_LB	N_Und_UB
1980	0	0.002326	0	0	0	0	0	0	0	0	0	0.002326	0	0.002326	1.04953	11.5671	10.8755	6.3895	17.2385	0.5	1.04943	0.002326	1.0471	99.7783	0.114569	0.026411	0.14098	0.000108	0.005189	0	0	0	0	0	0	0	0	0.000108	0.005189	0.000108	0.005189	0.083653	2.30631	0.083648	2.30608	0.000108	0.005189	0.08354	2.30089
1981	0	0.02863	0	0	0	0	0	0	0	0	0	0.02863	0	0.02863	2.65916	11.5671	10.8755	6.3895	17.2385	1.15895	3.70732	0.030957	3.67636	99.165	0.538962	0.147425	0.686387	0.002986	0.062212	0	0	0	0	0	0	0	0	0.002986	0.062212	0.002986	0.062212	0.542563	5.54647	0.626079	7.84337	0.003094	0.067401	0.622985	7.77606
1982	0	0.098859	0	0	0	0	0	0	0	0	0	0.098859	0	0.098859	3.63076	11.5671	10.8755	6.3895	17.2385	1.67942	7.33372	0.129816	7.2039	98.2299	1.2197	0.382648	1.60235	0.017314	0.208629	0	0	0	0	0	0	0	0	0.017314	0.208629	0.017314	0.208629	1.34211	7.06438	1.96742	14.8985	0.020409	0.275933	1.94701	14.6226
1983	0	0.216366	0	0	0	0	0	0	0	0	0	0.216366	0	0.216366	4.0925	11.5671	10.8755	6.3895	17.2385	2.20411	11.4167	0.346182	11.0705	96.9678	2.07029	0.72706	2.79735	0.05498	0.442153	0	0	0	0	0	0	0	0	0.05498	0.442153	0.05498	0.442153	2.01827	7.25491	4.31826	22.134	0.075389	0.718086	4.24287	21.4159
1984	1	0.0044	0	0	0	0	0	0	0	0	0	0.384911	0	0.335719	4.17254	18.0185	0.0005	0.0005	0.0005	63.0397	15.5744	0.350582	15.2238	97.749	3.15107	0.943999	4.09506	0	6.8734	0	0	0	0	0	0	0	0	0.132744	0.760441	0.107936	0.637607	2.51639	6.9541	7.40233	28.6242	0.154991	7.1303	6.25874	25.3539
1985	9	2.4e-05	0	0	0	0	0	0	0	0	0	0.579496	0	0.446475	3.99907	18.0185	0.0005	0.0005	0.0005	16716.8	18.5538	-0.649394	19.2032	103.5	4.30657	1.26202	5.56859	0	5.57765	0	0	0	0	0	0	0	0	0.25582	1.09987	0.13129	0.736311	2.66261	5.74261	9.29238	32.8466	-0.845009	11.5884	8.13873	28.9588
1986	4	0.070692	0	0	0	0	0	0	0	0	0	0.792783	0	0.588994	3.70023	18.0185	0.0005	0.0005	0.0005	11.5734	21.2281	-1.5787	22.8068	107.437	5.4726	1.63058	7.10318	0.032475	5.54968	0	0	0	0	0	0	0	0	0.388318	1.4354	0.189845	0.907639	2.31919	6.06222	11.4823	37.3982	-1.81816	16.6727	10.42	31.6056
1987	8	5.87454	0	0	0	0	0	0	0	0	0	1.03105	0	0.66397	3.40419	3.73795	2.8805	1.3835	5.2625	3.88601	23.603	3.29584	20.3071	86.0363	5.07937	1.54592	6.62529	2.07882	8.80674	0	0	0	0	0	0	0	0	0.552088	1.76252	0.246679	0.982471	1.58391	5.97784	13.8876	38.792	0.964314	21.1704	9.99732	28.3222
1988	4	5.29812	0	0	0	0	0	0	0	0	1	1.25737	0	0.625687	3.22681	3.73795	2.8805	1.3835	5.2625	4.32459	25.8022	7.59396	18.2082	70.5686	4.66105	1.44069	6.10174	3.02705	6.95817	0	0	0	0	0	0	0	0	0.730653	2.1345	0.295334	0.91541	0.998557	6.08974	16.4227	38.6411	3.5107	23.6173	10.5309	24.6888
1989	6	4.80085	0	0	0	0	0	0	0	0	6	1.47124	1	0.580916	3.20613	3.73795	2.8805	1.3835	5.2625	4.65402	26.9827	10.3948	16.5879	61.476	4.27586	1.33302	5.60888	3.08576	6.21112	0	0	0	0	0	0	0	0	0.923196	2.33682	0.283357	0.85544	0.914052	5.87053	17.5505	39.628	5.01006	25.078	9.02044	23.9722
1990	3	4.41024	0	0	0	0	0	0	0	0	4	1.67138	1	0.53777	3.32992	3.73795	2.8805	1.3835	5.2625	4.85571	26.2889	10.805	15.4839	58.8989	3.96251	1.23721	5.19973	2.89527	5.50865	0	0	0	0	0	0	0	0	1.12459	2.43565	0.260148	0.787712	0.837706	5.5463	16.6454	40.1656	4.54106	24.7901	7.61265	22.8598
1991	5	4.14173	0	0	0	0	0	0	0	0	3	1.85864	2	0.501413	3.58349	3.73795	2.8805	1.3835	5.2625	4.91918	25.8503	10.9468	14.9035	57.6532	3.74368	1.16303	4.90671	2.63078	5.01229	0	0	0	0	0	0	0	0	1.32987	2.58824	0.229577	0.766518	1.19012	5.71864	14.8324	42.4741	4.26569	24.6574	7.22383	22.3781
1992	3	4.00162	0	0	0	0	0	0	0	0	0	2.03643	0	0.475189	3.95215	3.73795	2.8805	1.3835	5.2625	4.85185	27.7815	12.9484	14.8331	53.392	3.63042	1.11628	4.74669	2.49158	5.04718	0	0	0	0	0	0	0	0	1.50352	2.77215	0.202843	0.735496	1.92787	6.11492	16.3293	45.9817	5.72899	26.6883	7.36842	23.2045
1993	6	3.9895	0	0	0	0	0	0	0	0	0	2.20992	0	0.460966	4.42124	3.73795	2.8805	1.3835	5.2625	4.68269	31.1824	15.9379	15.2445	48.8882	3.62566	1.09979	4.72544	2.51843	5.31823	0	0	0	0	0	0	0	0	1.60165	3.12383	0.195426	0.730257	2.49345	6.98343	19.2576	49.2921	8.27829	29.4565	8.25994	23.3709
1994	4	4.10019	0	0	0	0	0	0	0	0	1	2.38539	1	0.459507	4.97605	3.73795	2.8805	1.3835	5.2625	4.45562	33.1382	17.0381	16.1001	48.5847	3.72683	1.11416	4.84099	2.44502	5.75982	0	0	0	0	0	0	0	0	1.75356	3.38626	0.194661	0.742525	2.96296	7.56769	19.2178	53.3043	8.69639	31.4741	8.83254	25.6516
1995	5	4.3253	0	0	0	0	0	0	0	0	0	2.56951	0	0.470788	5.60196	3.73795	2.8805	1.3835	5.2625	4.21576	37.7194	20.3634	17.356	46.0135	3.92768	1.15852	5.0862	2.72535	6.21368	0	0	0	0	0	0	0	0	1.87288	3.56573	0.210176	0.801674	3.26416	8.28238	22.9818	59.9531	10.5114	35.3918	9.74916	26.4216
1996	5	4.70058	0	0	0	0	0	0	0	0	0	2.76899	0	0.493864	6.2916	3.73795	2.8805	1.3835	5.2625	3.99179	42.9892	24.064	18.9253	44.0233	4.2086	1.22757	5.43617	3.11433	6.73549	0	0	0	0	0	0	0	0	1.97432	3.71988	0.233689	0.86778	4.00325	8.59035	28.1806	66.0333	12.2671	39.7152	10.9018	27.3743
1997	1	5.21304	0	0	0	0	0	0	0	0	0	2.99023	1	0.526091	7.06539	3.6721	2.8255	1.3585	5.1655	3.80326	49.0314	28.277	20.7544	42.3288	4.55312	1.31627	5.86939	3.31513	7.30005	0	0	0	0	0	0	0	0	2.17944	4.02124	0.248918	0.926347	4.9802	9.31344	32.7473	71.9208	14.6525	44.5023	12.2273	29.9517
1998	8	5.81697	0	0	0	0	0	0	0	0	4	3.23941	2	0.566381	7.95532	3.60855	2.7725	1.3345	5.0715	3.64988	55.9618	33.094	22.8678	40.8632	4.96168	1.42416	6.38584	4.02535	7.78419	0	0	0	0	0	0	0	0	2.43808	4.40446	0.274626	0.970481	5.33252	9.92941	38.6245	80.5385	19.0119	49.8873	13.9893	32.4768
1999	8	6.52351	0	0	0	0	0	0	0	0	3	3.52319	2	0.614755	8.99362	3.54721	2.7225	1.3115	4.9815	3.52476	63.9283	38.6175	25.3108	39.5925	5.43951	1.55201	6.99152	4.70986	8.28703	0	0	0	0	0	0	0	0	2.73598	4.50916	0.311912	0.996396	6.3754	11.2032	46.127	89.8504	24.4179	56.4535	16.1798	34.4636
2000	7	7.34995	0	0	0	0	0	0	0	0	0	3.84897	0	0.671753	10.2125	3.48795	2.6735	1.2895	4.8945	3.42042	74.1111	45.9674	28.1437	37.975	5.99579	1.70179	7.69758	5.42066	8.94774	0	0	0	0	0	0	0	0	2.99935	4.84542	0.361808	1.01474	7.63285	12.6442	53.7385	100.524	29.2911	65.8732	18.891	37.6514
2001	7	8.31864	0	0	0	0	0	0	0	0	3	4.22515	0	0.738365	11.6442	3.43067	2.6265	1.2675	4.8105	3.33091	85.7228	54.2861	31.4367	36.6725	6.64268	1.87641	8.51909	5.98931	9.912	0	0	0	0	0	0	0	0	3.28729	5.28984	0.418503	1.0703	8.70307	14.4708	62.4186	111.75	35.9726	75.7852	22.373	41.4088
2002	7	9.456	0	0	0	0	0	0	0	0	1	4.66131	1	0.815934	13.321	3.37528	2.5815	1.2475	4.7295	3.25228	99.0078	63.7421	35.2657	35.6191	7.39435	2.07948	9.47383	7.16203	11.3426	0	0	0	0	0	0	0	0	3.74161	5.76176	0.503395	1.1615	10.1886	16.498	74.5189	123.832	45.2384	85.5768	26.1412	46.0398
2003	15	10.7916	0	0	0	0	0	0	0	0	5	5.16845	2	0.906046	15.2742	3.3217	2.5385	1.2275	4.6505	3.18228	114.242	74.5336	39.7084	34.7581	8.26606	2.31503	10.5811	8.55765	12.9066	0	0	0	0	0	0	0	0	4.1488	6.2696	0.597065	1.28481	12.1819	18.3049	86.3574	137.187	55.9592	95.836	29.3557	51.5219
2004	19	12.3552	4	1	0	5	2.55418	1.29389	1.2564	0.866493	1	5.75894	0	1.01035	17.4972	3.26983	2.4965	1.2085	4.5745	3.12021	131.695	86.8888	44.8059	34.0225	9.26975	2.58651	11.8563	9.96185	14.658	1.38302	4.19905	0.710387	2.12556	0.676686	2.09573	0.473184	1.40884	4.61487	6.82477	0.699964	1.35855	14.0719	20.7379	103.456	154.734	67.5056	108.716	34.1667	57.5648
2005	11	14.1606	3	1	2	0	3.36237	1.69931	1.64235	1.11448	2	6.44557	1	1.12974	19.8917	3.2196	2.4555	1.1905	4.5015	3.06825	149.537	99.0494	50.4872	33.7624	10.4006	2.89365	13.2943	11.7254	16.7972	1.23476	5.32252	0.614301	2.69074	0.591927	2.60155	0.392245	1.74269	5.17135	7.42075	0.796956	1.51781	16.3517	23.5059	121.128	174.285	80.3121	120.154	39.1496	63.1716
2006	12	16.1887	3	2	1	1	3.75955	1.89733	1.82766	1.222	2	7.23929	0	1.26316	22.3356	3.17094	2.4165	1.1725	4.4295	3.03011	171.817	115.238	56.5785	32.9296	11.6331	3.23085	14.864	13.6558	19.2195	2.29766	5.63274	1.13209	2.85738	1.07203	2.77765	0.650641	1.91576	5.86359	8.28263	0.886198	1.67677	19.0049	26.3768	143.322	202.037	93.8385	137.349	43.7389	70.145
2007	18	18.3886	6	0	3	1	4.08442	2.0605	1.98158	1.3075	0	8.14719	0	1.40741	24.7065	3.12377	2.3785	1.1555	4.3605	3.00793	196.461	133.627	62.8343	31.9831	12.9246	3.58763	16.5122	15.822	21.5106	1.69327	5.94296	0.865144	3.01574	0.850275	2.89179	0.629188	1.94674	6.79467	9.40244	0.972087	1.83523	21.4196	29.5945	167.888	232.6	109.701	156.808	48.0406	79.0346
2008	18	20.6845	1	3	5	2	5.70036	2.87743	2.76733	1.80478	0	9.17101	2	1.5574	26.882	3.07803	2.3425	1.1395	4.2945	3.00162	223.274	154.311	68.9632	30.8872	14.2196	3.9496	18.1692	17.9774	23.5911	3.46956	7.23334	1.76022	3.66975	1.68726	3.5458	0.90558	2.51056	7.82861	10.7914	1.06562	2.02424	23.3539	32.3912	194.58	264.9	128.413	178.656	52.1749	87.6993
2009	27	22.981	6	8	3	6	8.1586	4.1242	3.97254	2.56433	1	10.3059	1	1.70662	28.7399	3.03366	2.3065	1.1235	4.2295	3.00973	251.939	177.292	74.6468	29.6289	15.4545	4.29962	19.7541	19.9581	26.2661	6.48689	10.0828	3.30743	5.08103	3.16826	4.81111	2.00198	3.21746	8.81041	12.1501	1.15593	2.24305	24.5124	34.653	223.057	297.041	150.016	204.99	55.2982	95.654
2010	27	25.1686	7	6	5	2	8.41694	4.26377	4.11865	2.63475	4	11.5397	3	1.84762	30.1576	2.9906	2.2725	1.1075	4.1665	3.03043	281.015	201.461	79.5543	28.3096	16.5611	4.61888	21.18	22.0949	28.8115	6.50188	10.6132	3.23784	5.28826	3.18262	4.96403	1.90654	3.50174	10.0136	13.3106	1.2395	2.4548	25.6831	36.1076	251.88	327.208	173.368	232.944	58.3817	102.371
2011	23	27.1272	9	6	4	4	10.8747	5.52365	5.35676	3.39967	1	12.8522	0	1.97239	31.0154	2.94879	2.2395	1.0935	4.1055	3.06219	310.944	227.588	83.3556	26.8073	17.4696	4.88784	22.3574	23.8531	31.101	9.07265	12.8237	4.73072	6.41392	4.73759	6.09708	2.64196	4.22222	11.4119	14.6643	1.30556	2.6464	26.8847	36.9028	280.191	362.651	199.126	260.844	60.149	107.242
2012	22	28.7341	4	6	3	0	7.86566	4.00808	3.90627	2.46188	4	14.2152	3	2.0729	31.2451	2.90818	2.2075	1.0785	4.0465	3.10398	341.097	255.322	85.7751	25.1468	18.1161	5.08812	23.2042	25.3298	33.0355	5.4528	10.2236	2.82844	5.2303	2.77597	5.04662	1.60194	3.31172	12.6255	16.2678	1.33041	2.84836	27.5191	36.7736	309.466	395.394	226.618	288.589	61.367	112.986
2013	39	29.8854	10	16	6	1	11.2422	5.74949	5.63594	3.53018	5	15.5937	4	2.1422	30.8583	2.86873	2.1765	1.0645	3.9885	3.15437	370.861	284.207	86.6536	23.3655	18.4559	5.2058	23.6617	26.442	34.3019	9.17628	13.5254	4.73765	6.93138	4.65956	6.70926	2.56112	4.58511	13.982	17.8958	1.34287	2.9824	27.1066	36.0821	336.375	424.692	255.479	316.638	62.0533	117.534
2014	40	30.51	18	8	9	3	11.8211	6.06925	5.98772	3.72996	1	16.9484	1	2.17547	29.8792	2.83038	2.1465	1.0515	3.9335	3.21175	398.644	312.718	85.9268	21.5548	18.4648	5.2324	23.6972	27.1294	34.7896	10.0748	13.5001	5.22869	6.94368	5.24923	6.92329	2.81328	4.83515	15.1421	19.4978	1.34832	3.16368	26.2905	35.3654	358.896	449.931	282.043	345.91	61.6275	119.99
2015	21	30.5657	5	5	2	3	9.08083	4.68177	4.65111	2.88309	0	18.2377	1	2.17001	28.3321	2.79309	2.1175	1.0385	3.8785	3.27523	426.881	343.283	83.5975	19.5833	18.1351	5.16432	23.2994	27.3357	34.6309	7.11095	11.3661	3.7406	5.79274	3.83082	5.57453	2.01678	3.94803	16.269	21.0187	1.33128	3.29905	22.7692	34.3943	387.247	477.487	309.727	378.089	60.6687	120.128
2016	32	30.0321	12	3	7	5	10.6597	5.52043	5.52576	3.41038	1	19.4194	2	2.1251	26.2414	2.75681	2.0885	1.0255	3.8265	3.34523	453.028	373.315	79.7132	17.5956	17.4718	5.0019	22.4737	26.3531	34.0217	8.42759	12.6176	4.46929	6.44572	4.60128	6.34936	2.51877	4.60074	17.3728	22.1086	1.33696	3.3804	18.3951	34.5101	416.157	506.117	339.153	409.714	57.8646	117.929
2017	28	28.9044	12	6	5	2	10.904	5.67514	5.72821	3.52252	4	20.4521	2	2.04138	23.6312	2.72152	2.0615	1.0135	3.7755	3.42384	475.57	401.22	74.3499	15.6339	16.4886	4.74841	21.237	24.0944	33.9947	7.89861	13.8452	4.35649	7.02196	4.76526	6.92656	2.63149	4.98921	18.4442	23.2372	1.23802	3.40119	12.2455	34.7296	437.225	538.263	365.485	439.17	50.1952	113.169
2018	26	27.1898	6	5	6	3	9.6348	5.04399	5.14043	3.15276	3	21.2966	4	1.92062	20.5259	2.68717	2.0345	1.0015	3.7255	3.51544	495.011	427.41	67.6013	13.6565	15.205	4.4091	19.6141	19.7582	34.9187	5.95049	13.1579	3.30612	6.76803	3.55221	6.54493	2.10146	4.47927	19.3734	24.0846	1.16594	3.35566	4.33886	35.6109	446.056	568.313	389.42	466.85	39.3218	111.408
[truncated: 26 more columns]

## Sheet: Hetero_Norwegian_defaultCD4
year	N_HIV_D	N_HIV_Obs_M	N_CD4_1_D	N_CD4_2_D	N_CD4_3_D	N_CD4_4_D	N_CD4_1_Obs_M	N_CD4_2_Obs_M	N_CD4_3_Obs_M	N_CD4_4_Obs_M	N_AIDS_D	N_AIDS_M	N_HIVAIDS_D	N_HIVAIDS_Obs_M	N_Inf_M	t_diag	t_diag_p50	t_diag_p25	t_diag_p75	D_Avg_Time	N_Alive	N_Alive_Diag_M	N_Und	N_Und_Alive_p	N_Und_CD4_3_M	N_Und_CD4_4_M	N_Und_CD4_3p4_M	N_HIV_Obs_M_LB	N_HIV_Obs_M_UB	N_CD4_1_Obs_M_LB	N_CD4_1_Obs_M_UB	N_CD4_2_Obs_M_LB	N_CD4_2_Obs_M_UB	N_CD4_3_Obs_M_LB	N_CD4_3_Obs_M_UB	N_CD4_4_Obs_M_LB	N_CD4_4_Obs_M_UB	N_AIDS_M_LB	N_AIDS_M_UB	N_HIVAIDS_Obs_M_LB	N_HIVAIDS_Obs_M_UB	N_Inf_M_LB	N_Inf_M_UB	N_Alive_LB	N_Alive_UB	N_Alive_Diag_M_LB	N_Alive_Diag_M_UB	N_Und_LB	N_Und_UB
1980	0	0.006637	0	0	0	0	0	0	0	0	0	0.006637	0	0.006637	3.0105	11.5671	10.8755	6.3895	17.2385	0.5	3.01021	0.006637	3.00357	99.7795	0.327949	0.075565	0.403514	0.001704	0.010513	0	0	0	0	0	0	0	0	0.001704	0.010513	0.001704	0.010513	0.850245	4.70765	0.850169	4.70719	0.001704	0.010513	0.848465	4.69668
1981	0	0.082461	0	0	0	0	0	0	0	0	0	0.082461	0	0.082461	7.78683	11.5671	10.8755	6.3895	17.2385	1.15561	10.7934	0.089098	10.7043	99.1745	1.5634	0.426866	1.99026	0.025253	0.127724	0	0	0	0	0	0	0	0	0.025253	0.127724	0.025253	0.127724	3.14255	11.6659	3.98964	16.3033	0.026902	0.138237	3.96273	16.1651
1982	0	0.288162	0	0	0	0	0	0	0	0	0	0.288162	0	0.288162	10.945	11.5671	10.8755	6.3895	17.2385	1.6704	21.7257	0.37726	21.3485	98.2635	3.5936	1.12297	4.71656	0.108301	0.434236	0	0	0	0	0	0	0	0	0.108301	0.434236	0.108301	0.434236	6.12323	15.837	10.1081	32.1007	0.135203	0.572414	9.97289	31.5301
1983	0	0.639527	0	0	0	0	0	0	0	0	0	0.639527	0	0.639527	12.817	11.5671	10.8755	6.3895	17.2385	2.18485	34.5146	1.01679	33.4978	97.054	6.21107	2.16653	8.3776	0.289045	0.947625	0	0	0	0	0	0	0	0	0.289045	0.947625	0.289045	0.947625	8.58557	18.1251	19.6054	49.8388	0.424248	1.51825	19.1811	48.3453
1984	0	0.022096	0	0	0	0	0	0	0	0	0	1.15616	0	1.00813	13.7347	17.8074	0.0005	0.0005	0.0005	38.9235	48.2048	1.03888	47.166	97.8449	9.64153	2.86457	12.5061	0.009587	11.9812	0	0	0	0	0	0	0	0	0.62005	1.71456	0.502768	1.40427	10.7093	18.8345	30.6998	68.6136	0.576241	13.4995	28.0285	62.9895
1985	6	6.5e-05	0	0	0	0	0	0	0	0	0	1.77292	1	1.36758	14.0299	17.8074	0.0005	0.0005	0.0005	19124.5	62.1745	1.03895	61.1355	98.329	13.4747	3.9121	17.3868	0	12.9681	0	0	0	0	0	0	0	0	1.10575	2.58731	0.754102	1.83848	11.8117	18.4758	43.1926	87.435	0.576241	26.6841	41.2537	79.3113
1986	10	0.201193	0	0	0	0	0	0	0	0	2	2.47701	1	1.84454	14.0346	17.8074	0.0005	0.0005	0.0005	12.5356	75.1277	0.240141	74.8875	99.6804	17.5595	5.17397	22.7335	0.119321	13.5881	0	0	0	0	0	0	0	0	1.64382	3.57548	1.05391	2.42572	11.3216	19.0023	57.3181	103.501	-0.306772	38.9883	50.5064	93.4585
1987	25	20.007	0	0	0	0	0	0	0	0	2	3.30168	2	2.1217	14.0805	3.62045	2.7825	1.3385	5.0895	3.70699	89.1146	20.2472	68.8674	77.2796	16.6615	4.99711	21.6586	13.4705	24.8569	0	0	0	0	0	0	0	0	2.32324	4.67378	1.25607	2.73925	10.858	20.4182	72.3242	120.011	15.9824	55.3021	48.2526	84.7125
1988	24	18.6383	0	0	0	0	0	0	0	0	2	4.13602	2	2.04438	14.4634	3.62045	2.7825	1.3385	5.0895	4.04815	100.488	35.8855	64.6024	64.2887	15.8031	4.78776	20.5909	14.5491	22.0724	0	0	0	0	0	0	0	0	3.14779	5.68225	1.324	2.62992	10.0645	20.2444	84.8297	132.971	27.5315	71.3049	45.575	80.2414
1989	17	17.6504	0	0	0	0	0	0	0	0	2	4.9838	2	1.9592	15.2502	3.62045	2.7825	1.3385	5.0895	4.25442	113.652	51.5359	62.1159	54.6546	15.1349	4.5979	19.7328	14.4746	20.6627	0	0	0	0	0	0	0	0	4.02894	6.70014	1.25781	2.56736	10.9758	20.5386	96.5559	147.887	40.9848	87.3532	44.6571	77.2865
1990	16	17.0779	0	0	0	0	0	0	0	0	11	5.84237	2	1.88892	16.36	3.62045	2.7825	1.3385	5.0895	4.33368	126.928	65.6137	61.3147	48.3065	14.7389	4.46321	19.2021	14.1453	20.082	0	0	0	0	0	0	0	0	4.95193	7.67329	1.17873	2.51255	12.619	20.5319	109.99	163.983	54.0481	103.033	43.0626	78.2893
1991	17	16.9163	0	0	0	0	0	0	0	0	4	6.71178	2	1.84547	17.7045	3.62045	2.7825	1.3385	5.0895	4.31006	141.552	79.53	62.0215	43.8155	14.6438	4.4029	19.0467	14.1566	20.0706	0	0	0	0	0	0	0	0	5.79576	8.60018	1.12635	2.48003	14.3143	21.5393	121.692	181.067	67.3858	118.203	43.6038	78.9162
1992	19	17.1327	0	0	0	0	0	0	0	0	8	7.59616	2	1.83439	19.1955	3.62045	2.7825	1.3385	5.0895	4.21899	152.666	88.6628	64.0035	41.9238	14.8409	4.42291	19.2638	14.363	20.1036	0	0	0	0	0	0	0	0	6.63157	9.63812	1.12359	2.484	15.7151	22.8904	130.825	195.641	75.9253	126.045	45.8025	80.7434
1993	16	17.6746	0	0	0	0	0	0	0	0	7	8.50155	3	1.85638	20.7451	3.62045	2.7825	1.3385	5.0895	4.09748	162.329	95.3374	66.9921	41.2692	15.2968	4.5195	19.8163	15.1726	20.5374	0	0	0	0	0	0	0	0	7.41732	10.6614	1.1579	2.5308	16.3407	25.0171	139.539	209.568	80.7323	131.202	49.2308	85.2415
1994	7	18.4759	0	0	0	0	0	0	0	0	9	9.43377	1	1.90856	22.2649	3.62045	2.7825	1.3385	5.0895	3.97555	177.51	106.813	70.6969	39.8269	15.9622	4.6822	20.6444	15.6996	21.193	0	0	0	0	0	0	0	0	8.23784	11.858	1.22358	2.61955	17.2607	26.523	151.972	227.92	91.3209	147.006	50.6341	90.7951
1995	17	19.4622	0	0	0	0	0	0	0	0	16	10.3968	1	1.98585	23.6669	3.62045	2.7825	1.3385	5.0895	3.87256	193.089	118.276	74.814	38.7458	16.7772	4.89611	21.6733	16.1938	22.5473	0	0	0	0	0	0	0	0	9.23301	12.9535	1.25754	2.74668	18.5656	27.8568	167.005	245.841	101.261	162.581	52.3234	96.338
1996	23	20.421	0	0	0	0	0	0	0	0	8	11.3908	3	2.0825	24.8843	3.62045	2.7825	1.3385	5.0895	3.80094	213.882	134.697	79.1854	37.023	17.7113	5.15377	22.865	16.9925	23.5833	0	0	0	0	0	0	0	0	10.0895	13.9154	1.29547	2.89253	20.1843	30.028	186.037	267.245	116.522	180.623	54.5428	99.5633
1997	28	21.3061	0	0	0	0	0	0	0	0	9	12.4122	3	2.19675	25.9307	3.66387	2.8185	1.3555	5.1535	3.7608	235.716	152.003	83.7131	35.5144	18.7396	5.44847	24.1881	17.5379	24.6281	0	0	0	0	0	0	0	0	10.9896	14.8943	1.3514	3.04618	20.9815	30.2484	206.144	288.263	132.718	199.681	58.1059	103.148
1998	18	22.2065	0	0	0	0	0	0	0	0	3	13.4555	2	2.32398	26.8531	3.70837	2.8555	1.3725	5.2185	3.74921	257.466	169.209	88.2573	34.2791	19.8195	5.76684	25.5864	18.6312	26.0241	0	0	0	0	0	0	0	0	12.0392	15.884	1.42697	3.13677	22.3289	30.6955	227.135	309.736	146.349	218.693	62.5699	108.2
1999	21	23.0878	0	0	0	0	0	0	0	0	4	14.5136	3	2.45931	27.6995	3.75398	2.8935	1.3905	5.2855	3.76033	283.057	190.297	92.7605	32.7709	20.9251	6.09963	27.0247	19.2525	26.7764	0	0	0	0	0	0	0	0	12.9561	16.8754	1.54141	3.28327	23.5798	31.7082	251.634	338.5	166.843	240.498	67.6428	112.92
2000	32	23.9362	0	0	0	0	0	0	0	0	5	15.579	3	2.5996	28.5177	3.80073	2.9325	1.4085	5.3545	3.78767	306.461	209.233	97.2274	31.7259	22.0448	6.44157	28.4863	19.9118	27.5028	0	0	0	0	0	0	0	0	13.8397	17.8589	1.68026	3.42731	24.2409	32.8332	270.35	366.194	183.978	259.835	73.3126	116.128
2001	24	24.7529	0	0	0	0	0	0	0	0	6	16.6454	2	2.7433	29.3555	3.84867	2.9725	1.4265	5.4255	3.82533	329.695	227.986	101.709	30.8494	23.1792	6.79105	29.9702	21.7667	28.3141	0	0	0	0	0	0	0	0	14.7401	18.8262	1.83915	3.56584	24.1857	33.6844	292.085	389.59	199.785	279.277	79.589	121.403
2002	23	25.55	0	0	0	0	0	0	0	0	9	17.708	3	2.89038	30.2609	3.89784	3.0145	1.4465	5.4975	3.86833	358.829	252.536	106.292	29.6221	24.3392	7.14965	31.4888	22.4648	29.3268	0	0	0	0	0	0	0	0	15.7861	19.7721	2.01881	3.69449	24.9385	34.9879	323.719	418.551	222.741	304.834	84.4824	124.649
2003	28	26.3473	0	0	0	0	0	0	0	0	11	18.7641	5	3.04179	31.2809	3.9483	3.0565	1.4655	5.5715	3.91273	387.975	276.883	111.092	28.6338	25.5439	7.52165	33.0656	23.0672	30.2556	0	0	0	0	0	0	0	0	16.7666	20.9528	2.22051	3.82055	26.289	36.6764	351.339	447.374	247.957	330.757	89.7273	128.093
2004	29	27.1692	3	3	1	3	4.026	2.13945	2.2507	2.00528	8	19.8144	6	3.19993	32.4289	4.00008	3.1005	1.4865	5.6485	3.95559	418.263	302.053	116.21	27.7841	26.8161	7.91298	34.7291	23.6457	30.9565	1.95941	6.16867	1.03102	3.15025	1.06587	3.31775	0.904695	2.79046	17.6653	22.414	2.3963	3.94678	27.5834	37.9525	380.69	477.332	274.035	360.102	94.4877	133.692
2005	23	28.0319	5	2	3	4	6.31807	3.36277	3.5492	3.21323	4	20.8612	2	3.36696	33.6369	4.05325	3.1455	1.5075	5.7265	3.99606	449.752	328.085	121.667	27.0521	28.1686	8.32799	36.4966	24.6628	31.4671	4.24632	8.9488	2.26491	4.70029	2.4062	4.8316	2.2735	4.37422	18.66	23.7766	2.56895	4.06689	29.429	38.8274	411.889	510.424	297.411	387.233	100.386	141.72
2006	25	28.9327	4	2	1	2	4.15821	2.21658	2.34664	2.15942	5	21.9073	4	3.54407	34.8156	4.10785	3.1915	1.5295	5.8075	4.0356	484.411	357.017	127.394	26.2987	29.5988	8.76743	38.3662	25.6817	32.3312	2.38577	6.07177	1.27929	3.18408	1.35981	3.3596	1.13252	3.22262	19.4549	24.8539	2.75848	4.20464	30.7341	39.9644	443.89	548.579	323.863	417.127	107.55	146.664
2007	29	29.8518	7	5	4	1	6.48936	3.46521	3.68034	3.44412	3	22.9546	3	3.73096	35.8758	4.16393	3.2395	1.5525	5.8895	4.07693	520.122	386.869	133.253	25.6196	31.0884	9.228	40.3164	26.82	33.0258	4.65869	9.14217	2.47865	4.82718	2.62627	4.99671	2.38776	4.64352	20.3088	25.7479	2.96686	4.50166	31.045	41.4205	477.918	584.29	351.511	447.988	114.766	153.74
2008	31	30.7559	8	2	2	8	8.10324	4.33624	4.62255	4.40238	0	24.0019	6	3.92544	36.7279	4.22157	3.2895	1.5755	5.9745	4.12314	556.677	417.625	139.052	24.9789	32.6055	9.70233	42.3078	27.7712	33.7477	5.8457	9.99775	3.1084	5.29753	3.31168	5.56981	3.34395	5.40614	21.3158	26.528	3.19166	4.739	29.9795	42.4912	508.545	615.862	380.415	479.854	119.19	162.389
2009	27	31.602	6	6	3	7	10.2971	5.5251	5.9164	5.73953	5	25.0445	5	4.12384	37.2828	4.28082	3.3395	1.5995	6.0625	4.17719	592.778	448.227	144.551	24.3853	34.1054	10.1792	44.2845	28.6873	34.7838	9.04852	11.6918	4.89774	6.20331	5.19258	6.6123	5.00764	6.56532	22.3533	27.3582	3.34624	5.00526	29.0801	44.0503	543.518	652.296	409.561	511.697	120.21	169.177
2010	39	32.3396	7	4	5	15	9.77926	5.26487	5.66886	5.60773	4	26.0732	6	4.32074	37.4509	4.34174	3.3925	1.6245	6.1525	4.24177	630.038	480.567	149.472	23.7242	35.532	10.6436	46.1756	29.3248	35.8649	8.01898	11.0441	4.35369	5.93324	4.68359	6.37707	4.52984	6.69712	23.4098	28.4071	3.49755	5.26673	28.4683	44.7641	579.717	689.818	440.831	545.406	121.696	178.49
2011	37	32.9134	13	8	5	5	9.52693	5.15014	5.5827	5.63794	3	27.0737	3	4.50942	37.1441	4.40441	3.4465	1.6505	6.2445	4.31938	665.984	512.48	153.504	23.0492	36.8192	11.0773	47.8966	28.8483	36.2374	7.14355	11.6891	3.91284	6.17437	4.36477	6.47064	4.6094	6.54342	24.4637	29.434	3.53241	5.51994	29.0075	44.3399	614.334	725.773	471.037	575.869	122.96	188.14
2012	31	33.2657	8	0	8	5	8.39575	4.56114	4.98447	5.14565	2	28.0261	5	4.68173	36.3013	4.4689	3.5025	1.6775	6.3395	4.41251	701.078	544.746	156.333	22.2989	37.8946	11.4597	49.3543	28.8634	36.385	6.06967	9.90253	3.27994	5.33882	3.54247	5.7161	3.74633	6.24154	25.5514	30.4568	3.62642	5.77904	29.2734	43.4456	647.445	760.41	498.901	609.592	121.989	194.888
2013	24	33.3437	8	3	3	7	9.34324	5.10559	5.63342	5.95294	3	28.9061	1	4.82894	34.9025	4.53528	3.5605	1.7055	6.4375	4.52333	734.768	577.089	157.679	21.4597	38.6868	11.7693	50.4561	29.0711	36.6067	7.56013	11.3143	4.1385	6.05612	4.59305	6.70344	4.5045	7.19717	26.5371	31.4795	3.72681	6.11158	28.7842	43.0975	678.724	792.945	527.392	642.981	122.122	201.812
2014	33	33.1039	10	9	8	1	9.95439	5.47654	6.11118	6.6197	3	29.6851	5	4.94208	32.9343	4.60365	3.6205	1.7345	6.5385	4.65396	767.484	610.193	157.291	20.4944	39.128	11.985	51.1131	29.0233	36.5525	8.41873	11.5423	4.70081	6.28189	5.3013	6.97848	5.35607	8.03206	27.2415	32.369	3.81316	6.3762	26.6154	44.3321	706.276	838.368	558.513	676.762	123.606	202.414
2015	37	32.5115	9	6	10	4	9.23486	5.12057	5.78914	6.43774	4	30.3323	7	5.01255	30.3833	4.67407	3.6815	1.7645	6.6425	4.80713	795.647	640.705	154.942	19.4737	39.1541	12.0863	51.2404	28.4436	36.4427	7.65462	11.1199	4.31112	6.05691	5.00552	6.7567	5.36607	8.14831	27.741	32.9722	3.79117	6.75668	22.5474	45.7396	727.999	867.904	592.956	707.646	120.408	205.792
2016	35	31.5386	12	6	8	6	9.62922	5.38795	6.18458	7.07214	2	30.8148	5	5.03179	27.2362	4.74664	3.7455	1.7965	6.7495	4.98701	822.661	672.243	150.418	18.2843	38.7034	12.053	50.7564	27.423	37.1806	7.206	11.5035	4.15851	6.14825	4.91189	6.76917	5.3685	8.33461	27.9941	33.4951	3.69552	6.96799	17.2801	47.8193	747.389	910.292	626.177	739.324	110.688	218.873
2017	36	30.1629	14	5	9	1	8.37645	4.73753	5.53571	6.52161	6	31.0989	7	4.99161	23.4796	4.82146	3.8125	1.8285	6.8605	5.20019	844.921	701.406	143.515	16.9856	37.7161	11.8656	49.5817	25.3217	37.3369	6.18302	11.1416	3.64763	6.11879	4.47581	6.81847	5.05494	8.51446	28.1809	34.4386	3.49963	7.12146	11.4312	49.193	782.562	958.171	652.024	768.472	99.5295	233.48
2018	23	28.3667	7	4	5	4	7.24	4.14857	4.95203	6.02415	2	31.1503	2	4.88376	19.1002	4.89863	3.8805	1.8625	6.9745	5.45738	863.806	729.773	134.033	15.5165	36.1333	11.5045	47.6378	22.1104	38.5355	4.86241	10.8962	2.93549	6.01349	3.759	6.56613	4.7038	8.35414	28.2777	35.5379	3.21076	7.69903	4.04343	54.9707	794.404	1009.13	676.341	796.747	81.236	249.88
[truncated: 26 more columns]

## Sheet: Hetero_mig_SSA_defaultCD4
year	N_HIV_D	N_HIV_Obs_M	N_CD4_1_D	N_CD4_2_D	N_CD4_3_D	N_CD4_4_D	N_CD4_1_Obs_M	N_CD4_2_Obs_M	N_CD4_3_Obs_M	N_CD4_4_Obs_M	N_AIDS_D	N_AIDS_M	N_HIVAIDS_D	N_HIVAIDS_Obs_M	N_Inf_M	t_diag	t_diag_p50	t_diag_p25	t_diag_p75	D_Avg_Time	N_Alive	N_Alive_Diag_M	N_Und	N_Und_Alive_p	N_Und_CD4_3_M	N_Und_CD4_4_M	N_Und_CD4_3p4_M	N_HIV_Obs_M_LB	N_HIV_Obs_M_UB	N_CD4_1_Obs_M_LB	N_CD4_1_Obs_M_UB	N_CD4_2_Obs_M_LB	N_CD4_2_Obs_M_UB	N_CD4_3_Obs_M_LB	N_CD4_3_Obs_M_UB	N_CD4_4_Obs_M_LB	N_CD4_4_Obs_M_UB	N_AIDS_M_LB	N_AIDS_M_UB	N_HIVAIDS_Obs_M_LB	N_HIVAIDS_Obs_M_UB	N_Inf_M_LB	N_Inf_M_UB	N_Alive_LB	N_Alive_UB	N_Alive_Diag_M_LB	N_Alive_Diag_M_UB	N_Und_LB	N_Und_UB
1980	0	0.000227	0	0	0	0	0	0	0	0	0	0.000227	0	0.000227	0.176726	11.5671	10.8755	6.3895	17.2385	0.5	0.176716	0.000227	0.176489	99.8717	0.016154	0.003564	0.019718	0.000155	0.000311	0	0	0	0	0	0	0	0	0.000155	0.000311	0.000155	0.000311	0.120964	0.242158	0.120957	0.242144	0.000155	0.000311	0.120802	0.241833
1981	0	0.006336	0	0	0	0	0	0	0	0	0	0.006336	0	0.006336	1.16149	11.5671	10.8755	6.3895	17.2385	0.961915	1.33792	0.006563	1.33136	99.5094	0.169083	0.042764	0.211847	0.004356	0.008669	0	0	0	0	0	0	0	0	0.004356	0.008669	0.004356	0.008669	0.805703	1.58419	0.926468	1.82595	0.004511	0.008981	0.921957	1.81697
1982	0	0.037093	0	0	0	0	0	0	0	0	0	0.037093	0	0.037093	2.92313	11.5671	10.8755	6.3895	17.2385	1.37001	4.25941	0.043656	4.21576	98.9751	0.624011	0.176535	0.800546	0.025749	0.050579	0	0	0	0	0	0	0	0	0.025749	0.050579	0.025749	0.050579	2.06231	3.96325	2.98764	5.78697	0.03026	0.05956	2.95738	5.72741
1983	0	0.119102	0	0	0	0	0	0	0	0	0	0.119102	0	0.119102	5.23486	11.5671	10.8755	6.3895	17.2385	1.75976	9.48903	0.162758	9.32627	98.2848	1.52407	0.473409	1.99748	0.083589	0.161782	0	0	0	0	0	0	0	0	0.083589	0.161782	0.083589	0.161782	3.76764	7.04658	6.75159	12.8264	0.113849	0.221342	6.63774	12.6051
1984	0	0.001239	0	0	0	0	0	0	0	0	0	0.287849	0	0.250798	7.86991	16.0856	0.0005	0.0005	0.0005	137.35	17.3479	0.163997	17.1839	99.0547	3.07996	0.82672	3.90668	0.000792	8.65028	0	0	0	0	0	0	0	0	0.204503	0.410766	0.17818	0.308497	5.79857	10.5014	12.5423	23.3171	0.13246	8.86259	11.5263	20.7085
1985	1	0.000101	0	0	0	0	0	0	0	0	0	0.561278	0	0.440835	10.6015	16.0856	0.0005	0.0005	0.0005	3244.21	27.9299	0.164098	27.7658	99.4125	5.34015	1.42408	6.76423	0	10.0562	0	0	0	0	0	0	0	0	0.404213	0.794241	0.25054	0.531579	8.03195	13.9951	20.5602	37.3012	0.13247	18.8829	16.5895	33.3413
1986	6	0.082766	0	0	0	0	0	0	0	0	0	0.96299	0	0.733371	13.2028	16.0856	0.0005	0.0005	0.0005	9.97806	41.1004	0.246863	40.8536	99.3994	8.33853	2.27254	10.6111	0.066636	12.6499	0	0	0	0	0	0	0	0	0.704198	1.35146	0.300808	0.881532	10.3796	17.1948	30.8812	54.4827	0.199106	31.3464	21.3806	48.5901
1987	14	16.4562	0	0	0	0	0	0	0	0	1	1.54841	0	0.938641	15.4472	2.44203	1.8465	0.9185	3.3705	2.71839	54.5062	14.703	39.8032	73.025	8.1542	2.2509	10.4051	10.0935	20.1704	0	0	0	0	0	0	0	0	1.15084	2.08433	0.400369	1.161	12.7904	19.4882	41.4637	72.2327	11.6049	42.5422	26.4357	50.8208
1988	19	16.2812	0	0	0	0	0	0	0	0	0	2.26008	0	0.939863	17.1549	2.44203	1.8465	0.9185	3.3705	2.82457	67.6197	26.9843	40.6354	60.0941	8.24374	2.27357	10.5173	11.4258	18.7794	0	0	0	0	0	0	0	0	1.71342	2.99887	0.522081	1.25439	14.8693	20.7466	52.5132	89.6548	19.6553	53.9384	29.6179	53.6434
1989	30	16.7105	0	0	0	0	0	0	0	0	1	3.0979	1	0.956515	18.4449	2.44203	1.8465	0.9185	3.3705	2.82862	85.0224	42.6948	42.3277	49.7841	8.50391	2.33548	10.8394	12.9437	19.0801	0	0	0	0	0	0	0	0	2.40562	4.06539	0.586517	1.33431	15.9682	21.7655	68.9452	109.632	32.4564	71.0706	31.5161	55.533
1990	11	17.4328	0	0	0	0	0	0	0	0	1	4.0456	0	0.987719	19.6289	2.44203	1.8465	0.9185	3.3705	2.80315	102.608	58.1275	44.4803	43.3498	8.87233	2.42711	11.2994	14.7563	19.9879	0	0	0	0	0	0	0	0	3.24317	5.24733	0.626717	1.38815	16.422	22.9703	86.8429	127.759	45.2127	89.1179	31.9872	57.5926
1991	35	18.3427	0	0	0	0	0	0	0	0	2	5.08491	0	1.03059	21.0279	2.44203	1.8465	0.9185	3.3705	2.77296	123.59	76.4702	47.12	38.126	9.33947	2.54623	11.8857	16.1426	21.2451	0	0	0	0	0	0	0	0	4.22065	6.41745	0.650778	1.43543	17.7373	24.3506	106.608	149.786	62.0398	110.513	32.7527	61.2595
1992	29	19.4821	0	0	0	0	0	0	0	0	4	6.20397	1	1.086	22.9631	2.44203	1.8465	0.9185	3.3705	2.73888	140.505	89.9523	50.5532	35.9795	9.94353	2.70095	12.6445	16.5261	22.2723	0	0	0	0	0	0	0	0	5.34225	7.56973	0.66259	1.5111	18.3304	26.5454	122.361	167.202	74.4661	125.942	34.2696	67.3903
1993	28	20.9916	0	0	0	0	0	0	0	0	3	7.4021	1	1.15908	25.7555	2.44203	1.8465	0.9185	3.3705	2.69506	161.21	105.944	55.266	34.282	10.7608	2.9092	13.67	18.2711	24.17	0	0	0	0	0	0	0	0	6.46964	8.83696	0.69656	1.67156	20.1932	29.7216	137.52	190.61	89.7216	139.6	35.2842	74.372
1994	16	23.0774	0	0	0	0	0	0	0	0	6	8.69362	4	1.25876	29.7261	2.44203	1.8465	0.9185	3.3705	2.63796	186.88	125.021	61.8593	33.101	11.8956	3.19692	15.0925	19.414	26.7072	0	0	0	0	0	0	0	0	7.7089	10.1481	0.753126	1.84921	23.5702	34.1322	157.545	218.562	108.635	155.014	39.2431	81.4233
1995	26	25.9882	0	0	0	0	0	0	0	0	6	10.1107	2	1.39698	35.1951	2.44203	1.8465	0.9185	3.3705	2.5697	214.014	143.009	71.0046	33.1776	13.4721	3.59613	17.0682	21.7254	29.9518	0	0	0	0	0	0	0	0	8.82675	11.7071	0.842322	2.03464	28.7867	39.5346	179.409	247.457	126.195	173.572	46.0799	90.833
1996	30	30.2602	0	0	0	0	0	0	0	0	7	11.7053	2	1.58583	42.3363	2.44203	1.8465	0.9185	3.3705	2.49532	250.28	167.27	83.0107	33.1671	15.5544	4.12388	19.6783	25.4211	34.3077	0	0	0	0	0	0	0	0	10.1156	13.4132	0.975346	2.24386	35.5864	46.228	213.098	286.497	147.848	201.733	56.6662	102.669
1997	26	36.0524	0	0	0	0	0	0	0	0	4	13.5455	1	1.82802	50.7632	2.40111	1.8155	0.9045	3.3115	2.42907	298.963	201.322	97.641	32.6599	18.1317	4.78027	22.912	31.0747	39.9356	0	0	0	0	0	0	0	0	11.6695	15.3416	1.16141	2.48703	44.993	54.4585	259.662	337.4	177.318	240.764	71.5391	116.39
1998	25	43.0759	0	0	0	0	0	0	0	0	8	15.701	2	2.12276	59.8571	2.36163	1.7855	0.8915	3.2545	2.38057	350.726	236.398	114.329	32.5976	21.1419	5.55466	26.6965	37.6112	46.8034	0	0	0	0	0	0	0	0	13.763	17.6505	1.40109	2.76093	54.1281	64.647	308.254	391.192	208.164	276.643	88.0098	134.119
1999	57	51.0994	0	0	0	0	0	0	0	0	4	18.232	3	2.46129	68.9939	2.32353	1.7565	0.8785	3.1995	2.35485	414.612	282.497	132.115	31.8646	24.4352	6.41275	30.848	45.8423	55.0704	0	0	0	0	0	0	0	0	16.2636	20.1693	1.68642	3.08399	63.0377	75.1727	371.237	458.044	250.776	325.981	106.161	150.833
2000	67	59.7196	0	0	0	0	0	0	0	0	12	21.1783	8	2.82613	77.5495	2.28674	1.7285	0.8665	3.1465	2.35036	485.037	335.217	149.82	30.8884	27.8055	7.30322	35.1087	55.1136	64.7783	0	0	0	0	0	0	0	0	18.9918	23.126	2.04341	3.47054	71.2415	84.9957	435.598	532.429	301.112	381.408	122.613	170.212
2001	62	68.4175	0	0	0	0	0	0	0	0	8	24.5514	2	3.1939	84.9	2.25118	1.7015	0.8545	3.0955	2.36276	565.796	399.634	166.162	29.3677	31.0146	8.16443	39.179	63.8164	74.404	0	0	0	0	0	0	0	0	22.2301	26.6536	2.42566	3.84768	77.6986	93.0612	508.206	617.728	364.209	451.533	139.043	187.946
2002	96	76.5996	0	0	0	0	0	0	0	0	12	28.3281	7	3.53795	90.4213	2.21681	1.6755	0.8425	3.0465	2.38786	654.061	474.234	179.827	27.4939	33.812	8.92999	42.742	71.355	83.3646	0	0	0	0	0	0	0	0	25.6761	30.7447	2.73764	4.18422	82.3272	99.5601	588.353	708.061	435.541	532.466	151.371	202.536
2003	84	83.6268	0	0	0	0	0	0	0	0	17	32.4463	3	3.83042	93.4954	2.18356	1.6515	0.8315	2.9985	2.42287	743.388	553.861	189.527	25.495	35.9477	9.53291	45.4806	77.4547	91.0322	0	0	0	0	0	0	0	0	29.6043	34.8366	2.98337	4.46879	85.6514	102.822	678.027	806.446	511.932	613.474	157.875	212.517
2004	85	88.8567	10	0	16	16	20.2067	9.87941	8.97303	4.3814	4	36.8029	3	4.0442	93.7777	2.15137	1.6265	0.8205	2.9525	2.46645	836.987	642.718	194.27	23.2106	37.2061	9.91357	47.1197	81.9121	96.5666	16.4837	25.509	7.91968	12.3198	7.02774	10.9987	3.29612	5.34713	33.8831	39.3783	3.18333	4.69271	86.3473	102.752	767.041	908.946	598.496	704.647	161.948	216.495
2005	74	91.8274	2	3	11	9	14.3071	7.02255	6.41728	3.12242	6	41.26	3	4.15857	91.5823	2.12021	1.6035	0.8105	2.9085	2.51629	926.386	732.545	193.841	20.9244	37.4894	10.0396	47.529	84.8611	99.8604	9.33503	17.9922	4.53646	8.73207	4.03876	7.97271	1.80874	3.89709	38.1067	44.1639	3.27599	4.79822	84.9794	99.7366	849.439	1006.25	686.267	802.508	162.472	215.072
2006	95	92.4075	0	5	7	18	13.7338	6.76786	6.22395	3.01871	8	45.6628	6	4.1661	87.3949	2.09003	1.5815	0.8005	2.8655	2.56888	1012.6	823.952	188.645	18.6298	36.8257	9.91118	46.7369	85.596	99.9014	10.1064	18.1421	4.94603	8.92732	4.49845	8.19195	2.11642	3.95161	42.2858	49.0169	3.26213	4.78957	81.4052	94.3723	929.695	1096.97	772.694	900.489	156.526	207.925
2007	80	90.7286	6	10	13	12	20.6904	10.2342	9.47047	4.57891	3	49.8533	1	4.07134	81.7027	2.06077	1.5595	0.7905	2.8235	2.62123	1092.12	912.681	179.439	16.4304	35.329	9.55315	44.8821	84.6219	97.5926	16.7475	26.2258	8.27883	12.9644	7.54169	11.9551	3.43422	5.69923	46.2231	53.6582	3.13221	4.68758	76.9285	88.5483	1004.45	1180.25	858.634	993.789	147.51	197.705
2008	98	87.0914	12	26	30	9	30.9218	15.3473	14.2854	6.88427	8	53.6834	3	3.88774	74.9928	2.0324	1.5385	0.7815	2.7825	2.67133	1161.94	994.772	167.169	14.3871	33.1647	9.00647	42.1712	81.3572	93.2416	26.8744	34.7733	13.3028	17.0104	12.5217	16.1082	5.55039	8.03704	49.8505	57.7681	2.94034	4.49857	70.087	81.4374	1070.7	1251.91	938.298	1081.6	136.305	186.927
2009	101	81.9011	12	25	18	25	28.9138	14.3941	13.4697	6.46838	3	57.0249	2	3.63413	67.7522	2.00488	1.5185	0.7725	2.7435	2.71778	1225.53	1072.67	152.86	12.473	30.5247	8.32098	38.8456	76.3601	86.7361	25.2672	33.3749	12.4184	16.4573	11.8761	15.2566	5.09414	7.32228	53.0149	61.1614	2.69511	4.24019	62.0911	74.5943	1131.81	1315.54	1013.68	1160.57	123.301	172.661
2010	79	75.6245	9	11	21	23	27.763	13.8564	13.027	6.23155	4	59.7778	3	3.33202	60.4682	1.97818	1.4985	0.7635	2.7055	2.75906	1284.86	1147.3	137.557	10.706	27.6101	7.55025	35.1603	70.3433	80.8698	24.8955	31.3855	12.4555	15.6101	11.5342	14.5659	5.03641	7.2084	55.556	64.1409	2.40085	3.93493	54.061	67.4305	1192.14	1373.4	1083.03	1234.12	108.423	157.161
2011	74	68.7629	1	14	13	31	24.1952	12.0986	11.4167	5.43715	5	61.8757	1	3.00388	53.6156	1.95225	1.4795	0.7555	2.6685	2.79283	1333.34	1211.06	122.277	9.17076	24.6204	6.74801	31.3684	63.7888	73.9044	21.3644	27.0395	10.5854	13.6511	9.78078	12.7091	4.33158	6.4292	57.4979	66.543	2.1253	3.58315	46.7219	60.3536	1243.93	1419.42	1141.82	1295.7	96.5532	140.646
2012	56	61.8059	17	6	6	12	20.4239	10.2231	9.67022	4.58127	5	63.289	2	2.67125	47.4201	1.92707	1.4605	0.7465	2.6325	2.81587	1380.64	1272.87	107.774	7.80606	21.7234	5.96107	27.6845	56.0081	66.9072	15.6481	23.7171	7.86187	11.7586	7.67518	11.0634	3.6428	5.4776	59.1584	67.8315	1.88288	3.28735	40.9079	54.1775	1290.97	1463.84	1198.98	1356.45	85.3829	126.372
2013	52	55.0851	4	2	13	24	21.951	10.9894	10.406	4.89999	6	64.0207	5	2.35057	41.7213	1.9026	1.4425	0.7385	2.5985	2.8277	1421.26	1326.95	94.3062	6.63541	19.007	5.21744	24.2245	49.3807	60.2889	18.9428	26.1001	9.56495	12.6325	8.98829	11.742	3.9186	5.80849	60.2875	68.3355	1.65766	2.96314	36.505	48.3981	1328.66	1503.88	1248.74	1410.02	74.6528	112.559
2014	42	48.711	5	6	10	8	16.6509	8.3345	7.89372	3.69293	2	64.0965	5	2.05006	36.2979	1.87881	1.4255	0.7315	2.5645	2.83236	1456.47	1374.66	81.8027	5.61652	16.4888	4.52646	21.0152	43.567	54.1378	13.7004	20.0473	6.88631	9.81634	6.69398	9.13954	2.87224	4.5337	60.5735	68.2639	1.45063	2.67081	31.936	42.3177	1363.68	1538.52	1292.43	1455.74	65.7942	99.082
2015	38	42.6428	9	6	7	9	16.4897	8.2547	7.82034	3.63587	3	63.5558	3	1.77115	30.9285	1.85568	1.4085	0.7235	2.5315	2.83715	1487.32	1417.31	70.0104	4.70716	14.1413	3.88433	18.0256	38.2853	47.6256	13.6747	20.1902	6.89654	9.72258	6.42925	8.9337	2.75109	4.40725	60.1908	67.3856	1.25071	2.3739	27.1282	35.9937	1396.93	1565.67	1331.3	1496.74	55.3251	86.8468
2016	36	36.7497	8	5	9	10	15.0972	7.56708	7.18033	3.32155	5	62.4438	2	1.51069	25.3918	1.83318	1.3915	0.7165	2.4995	2.85246	1511.64	1453.06	58.5859	3.87565	11.9115	3.27916	15.1907	33.1702	41.4136	12.4897	18.4537	6.31067	8.85967	6.05119	8.43629	2.60644	4.061	59.2219	66.1155	1.06694	2.06965	20.5083	31.3247	1423.54	1590.16	1363.47	1534.12	45.2349	74.3261
2017	34	30.8499	2	13	12	6	13.0295	6.55461	6.2491	2.8836	2	60.8057	0	1.26287	19.4664	1.81129	1.3765	0.7085	2.4685	2.89388	1531.05	1483.91	47.1467	3.07937	9.73379	2.69471	12.4285	26.9772	35.6337	10.8821	15.653	5.59756	7.62116	5.26019	7.14981	2.24995	3.55794	57.6808	64.4999	0.871824	1.78452	13.3115	28.3431	1445.01	1615.46	1393.34	1567.2	35.4587	65.1147
2018	26	24.7334	4	3	8	10	10.2579	5.2043	5.01759	2.32104	1	58.6803	0	1.02054	12.9309	1.78998	1.3605	0.7015	2.4385	2.99036	1543.94	1508.64	35.2993	2.28631	7.53732	2.11285	9.65017	19.1557	31.1996	7.69414	14.0904	3.9912	6.75387	3.83836	6.10644	1.6199	3.09431	55.464	62.2485	0.646258	1.61639	4.6809	26.8616	1450.66	1640.62	1420.08	1592.81	21.0592	54.945
[truncated: 26 more columns]

## Sheet: Hetero_mig_nonSSA_defaultCD4
year	N_HIV_D	N_HIV_Obs_M	N_CD4_1_D	N_CD4_2_D	N_CD4_3_D	N_CD4_4_D	N_CD4_1_Obs_M	N_CD4_2_Obs_M	N_CD4_3_Obs_M	N_CD4_4_Obs_M	N_AIDS_D	N_AIDS_M	N_HIVAIDS_D	N_HIVAIDS_Obs_M	N_Inf_M	t_diag	t_diag_p50	t_diag_p25	t_diag_p75	D_Avg_Time	N_Alive	N_Alive_Diag_M	N_Und	N_Und_Alive_p	N_Und_CD4_3_M	N_Und_CD4_4_M	N_Und_CD4_3p4_M	N_HIV_Obs_M_LB	N_HIV_Obs_M_UB	N_CD4_1_Obs_M_LB	N_CD4_1_Obs_M_UB	N_CD4_2_Obs_M_LB	N_CD4_2_Obs_M_UB	N_CD4_3_Obs_M_LB	N_CD4_3_Obs_M_UB	N_CD4_4_Obs_M_LB	N_CD4_4_Obs_M_UB	N_AIDS_M_LB	N_AIDS_M_UB	N_HIVAIDS_Obs_M_LB	N_HIVAIDS_Obs_M_UB	N_Inf_M_LB	N_Inf_M_UB	N_Alive_LB	N_Alive_UB	N_Alive_Diag_M_LB	N_Alive_Diag_M_UB	N_Und_LB	N_Und_UB
1980	0	0.004635	0	0	0	0	0	0	0	0	0	0.004635	0	0.004635	2.0918	11.5671	10.8755	6.3895	17.2385	0.5	2.0916	0.004635	2.08696	99.7784	0.22832	0.052632	0.280952	0.002917	0.007083	0	0	0	0	0	0	0	0	0.002917	0.007083	0.002917	0.007083	1.32732	3.1823	1.32719	3.18198	0.002917	0.007083	1.32428	3.1749
1981	0	0.057073	0	0	0	0	0	0	0	0	0	0.057073	0	0.057073	5.30448	11.5671	10.8755	6.3895	17.2385	1.1588	7.39355	0.061708	7.33185	99.1654	1.07471	0.293948	1.36866	0.036445	0.086532	0	0	0	0	0	0	0	0	0.036445	0.086532	0.036445	0.086532	3.45568	7.93047	4.78407	11.1086	0.039361	0.093615	4.74468	11.015
1982	0	0.197159	0	0	0	0	0	0	0	0	0	0.197159	0	0.197159	7.24768	11.5671	10.8755	6.3895	17.2385	1.67909	14.6325	0.258867	14.3737	98.2309	2.43328	0.763281	3.19656	0.127756	0.29593	0	0	0	0	0	0	0	0	0.127756	0.29593	0.127756	0.29593	4.88564	10.5648	9.66408	21.6604	0.167151	0.389545	9.49693	21.2709
1983	0	0.431656	0	0	0	0	0	0	0	0	0	0.431656	0	0.431656	8.17066	11.5671	10.8755	6.3895	17.2385	2.20361	22.7842	0.690523	22.0937	96.9693	4.13133	1.4507	5.58203	0.28434	0.640242	0	0	0	0	0	0	0	0	0.28434	0.640242	0.28434	0.640242	5.76199	11.7179	15.4135	33.1319	0.451491	1.02979	14.962	32.1021
1984	1	0.008721	0	0	0	0	0	0	0	0	0	0.768049	0	0.669891	8.32264	18.0174	0.0005	0.0005	0.0005	63.4308	31.0773	0.699244	30.378	97.75	6.28797	1.88368	8.17165	0.004614	9.29696	0	0	0	0	0	0	0	0	0.515658	1.14399	0.449619	0.929144	6.2267	11.3916	21.6204	44.4583	0.465525	9.95518	21.1585	40.3522
1985	10	0.000356	0	0	0	0	0	0	0	0	0	1.15625	0	0.890823	7.95285	18.0174	0.0005	0.0005	0.0005	2236.45	37.9908	-0.3004	38.2912	100.791	8.59022	2.51756	11.1078	0	9.2065	0	0	0	0	0	0	0	0	0.793457	1.70029	0.570018	1.16095	6.10585	10.6598	27.0152	54.7309	-0.534475	18.1617	25.7874	48.896
1986	8	0.142303	0	0	0	0	0	0	0	0	0	1.58116	0	1.17462	7.31052	18.0174	0.0005	0.0005	0.0005	11.4816	44.2496	-1.1581	45.4077	102.617	10.9054	3.25031	14.1557	0.090111	9.22783	0	0	0	0	0	0	0	0	1.11269	2.28592	0.701158	1.448	5.72355	9.87658	32.4677	61.6418	-1.44436	26.3895	28.2892	55.2985
1987	11	12.0747	0	0	0	0	0	0	0	0	0	2.05578	0	1.31688	6.64489	3.62052	2.7825	1.3395	5.0895	3.88766	49.8364	9.91656	39.9198	80.1018	9.99877	3.04483	13.0436	8.26586	15.7062	0	0	0	0	0	0	0	0	1.49228	2.93209	0.733793	1.57635	5.03197	9.05488	37.9625	66.6501	6.73821	33.681	25.8796	47.1324
1988	14	10.7471	0	0	0	0	0	0	0	0	2	2.50309	1	1.22607	6.20518	3.62052	2.7825	1.3395	5.0895	4.33034	51.9875	16.6637	35.3238	67.9467	9.05953	2.80256	11.8621	7.96478	13.3131	0	0	0	0	0	0	0	0	1.87727	3.4348	0.708464	1.46642	4.17167	8.73862	38.9465	70.7195	10.913	37.8647	24.6385	41.0531
1989	15	9.61583	0	0	0	0	0	0	0	0	6	2.92229	1	1.12446	6.24058	3.62052	2.7825	1.3395	5.0895	4.66141	55.1785	23.2795	31.899	57.8105	8.21902	2.5635	10.7825	7.2587	11.6619	0	0	0	0	0	0	0	0	2.27176	3.8426	0.692553	1.31054	3.36471	9.00907	42.2015	75.8732	15.339	43.6798	22.1962	37.7168
1990	8	8.78308	0	0	0	0	0	0	0	0	6	3.31452	2	1.03126	6.96644	3.62052	2.7825	1.3395	5.0895	4.83727	56.0995	26.0626	30.0369	53.5422	7.60437	2.36797	9.97234	6.65536	10.1911	0	0	0	0	0	0	0	0	2.59135	4.3471	0.654995	1.24817	3.7385	10.2602	42.619	78.7676	16.2254	46.4681	20.3282	36.4196
1991	9	8.36076	0	0	0	0	0	0	0	0	5	3.69203	2	0.962648	8.41014	3.62052	2.7825	1.3395	5.0895	4.80732	59.4672	29.4234	30.0438	50.5217	7.32169	2.25124	9.57293	6.47248	9.6828	0	0	0	0	0	0	0	0	2.94337	4.83195	0.605073	1.19035	5.00542	11.8586	45.0881	81.0607	18.3983	50.2125	20.2246	37.5055
1992	8	8.42946	0	0	0	0	0	0	0	0	3	4.07767	1	0.931632	10.4902	3.62052	2.7825	1.3395	5.0895	4.5718	63.9163	31.8528	32.0635	50.1648	7.4396	2.23876	9.67836	6.2244	10.2456	0	0	0	0	0	0	0	0	3.32515	5.32469	0.560058	1.19332	7.20459	13.5828	48.712	85.4089	20.7134	53.2807	21.4332	40.0976
1993	13	9.02885	0	0	0	0	0	0	0	0	1	4.50106	1	0.947047	13.1207	3.62052	2.7825	1.3395	5.0895	4.20868	74.9952	38.8817	36.1135	48.1545	7.99329	2.3461	10.3394	6.52806	11.0923	0	0	0	0	0	0	0	0	3.70375	5.6877	0.586932	1.21915	10.4343	15.6743	58.9845	96.7965	28.4262	60.9716	25.0179	44.4336
1994	13	10.1658	0	0	0	0	0	0	0	0	2	4.9954	1	1.01384	16.2157	3.62052	2.7825	1.3395	5.0895	3.82933	85.1662	43.0475	42.1187	49.4547	8.991	2.58031	11.5713	7.56071	12.4925	0	0	0	0	0	0	0	0	4.16666	6.1568	0.63083	1.29672	13.328	19.0408	68.5883	107.214	31.5868	65.5798	30.7421	51.7042
1995	8	11.8224	0	0	0	0	0	0	0	0	1	5.59454	0	1.13367	19.6892	3.62052	2.7825	1.3395	5.0895	3.51453	101.805	51.8698	49.9356	49.05	10.4199	2.94143	13.3613	9.28168	14.0705	0	0	0	0	0	0	0	0	4.73748	6.78606	0.74403	1.43949	16.5273	22.7822	84.8598	125.542	37.7127	74.7734	36.6425	60.948
1996	14	13.9462	0	0	0	0	0	0	0	0	2	6.33044	2	1.30566	23.4555	3.62052	2.7825	1.3395	5.0895	3.29364	123.203	63.816	59.3873	48.2027	12.2547	3.42503	15.6797	11.6052	16.1205	0	0	0	0	0	0	0	0	5.46231	7.5257	0.867435	1.64719	19.8394	26.6407	105.571	148.634	49.336	86.6493	45.3506	71.8169
1997	9	16.4847	0	0	0	0	0	0	0	0	1	7.23126	1	1.52737	27.4285	3.62766	2.7885	1.3415	5.0995	3.1601	148.565	78.3007	70.2638	47.2952	14.459	4.02272	18.4817	14.0722	18.7455	0	0	0	0	0	0	0	0	6.36918	8.53623	1.02337	1.92902	23.3874	30.7147	129.409	173.639	62.0394	100.645	54.5199	83.8914
1998	16	19.3911	0	0	0	0	0	0	0	0	12	8.31977	7	1.79447	31.5224	3.63483	2.7945	1.3445	5.1105	3.09487	179.008	96.6918	82.3161	45.9846	16.9841	4.72201	21.7061	16.6956	21.7554	0	0	0	0	0	0	0	0	7.39844	9.62018	1.26909	2.23421	27.1226	35.3551	157.671	203.966	78.601	118.273	63.7747	96.8036
1999	22	22.5971	0	0	0	0	0	0	0	0	5	9.61228	3	2.10136	35.6513	3.64203	2.8005	1.3475	5.1205	3.07831	211.567	116.289	95.2776	45.0344	19.775	5.50799	25.283	19.9713	25.2692	0	0	0	0	0	0	0	0	8.61024	10.8847	1.52708	2.57158	31.0893	39.8494	186.296	240.084	96.3689	138.197	74.1272	111.474
2000	29	26.0301	0	0	0	0	0	0	0	0	5	11.1178	4	2.44143	39.7329	3.64926	2.8065	1.3495	5.1315	3.09471	248.192	139.319	108.873	43.8664	22.7722	6.36405	29.1362	22.9902	29.1051	0	0	0	0	0	0	0	0	9.98833	12.4043	1.78394	2.9304	34.9502	44.0361	218.738	281.006	117.632	162.93	85.5612	125.204
2001	24	29.6159	0	0	0	0	0	0	0	0	6	12.8383	1	2.80773	43.6961	3.65652	2.8125	1.3525	5.1425	3.13271	289.764	166.935	122.829	42.3894	25.9142	7.2726	33.1868	26.3793	33.0618	0	0	0	0	0	0	0	0	11.4932	14.1605	2.07349	3.31283	38.4335	48.1738	256.401	324.039	143.7	192.339	97.9671	138.493
2002	33	33.2814	0	0	0	0	0	0	0	0	4	14.7679	2	3.19267	47.4732	3.66381	2.8185	1.3555	5.1525	3.18446	336.096	199.216	136.88	40.7265	29.1396	8.21572	37.3553	29.8015	36.9625	0	0	0	0	0	0	0	0	13.2244	16.1131	2.39393	3.7467	41.8528	52.4833	299.491	370.978	175.295	229.168	111.181	154.658
2003	54	36.9551	0	0	0	0	0	0	0	0	11	16.8942	6	3.58886	50.9968	3.67112	2.8245	1.3585	5.1635	3.24478	383.935	233.171	150.764	39.268	32.3872	9.17532	41.5625	32.8968	40.7811	0	0	0	0	0	0	0	0	15.1441	18.3916	2.74244	4.17399	45.1402	56.7069	345.123	422.651	207.246	265.844	124.905	170.798
2004	54	40.5669	6	4	5	10	8.00878	4.12863	4.10027	3.21877	10	19.1984	7	3.98877	54.1993	3.67847	2.8305	1.3615	5.1745	3.31037	435.958	271.738	164.22	37.6688	35.5959	10.1333	45.7292	36.0115	44.4267	5.49315	11.7162	2.82777	5.9759	2.8041	5.90744	2.24313	4.5497	17.2204	20.8456	3.11504	4.60515	48.2533	61.4196	394.377	477.111	243.938	306.502	137.99	187.589
2005	42	44.0478	3	11	4	2	8.11233	4.1992	4.20036	3.31963	8	21.6556	2	4.38479	57.0132	3.68585	2.8365	1.3635	5.1855	3.37925	489.778	312.786	176.992	36.1372	38.7051	11.0716	49.7767	38.9765	48.4766	5.78734	10.936	3.00863	5.67106	2.9894	5.62956	2.38884	4.41643	19.5076	23.473	3.50612	5.09129	50.3976	64.8206	443.898	537.149	279.823	348.818	150.005	204.887
2006	38	47.3301	4	2	2	2	4.67601	2.43028	2.44848	1.9481	5	24.2357	1	4.76952	59.371	3.69326	2.8435	1.3665	5.1965	3.45031	547.939	359.116	188.823	34.4606	41.6541	11.972	53.6261	41.9039	52.3791	2.41459	7.53084	1.26228	3.91461	1.28512	3.94494	1.04104	3.08041	21.9796	26.3764	3.8788	5.59535	51.9535	67.6743	501.124	602.132	322.257	395.461	161.743	219.941
2007	47	50.3463	7	1	8	6	8.54885	4.46103	4.52689	3.62585	2	26.9038	0	5.13525	61.2052	3.70069	2.8495	1.3695	5.2075	3.52314	605.918	406.462	199.455	32.9179	44.3822	12.8165	57.1988	44.7445	55.9524	6.09205	11.5534	3.2132	5.89393	3.29649	6.01089	2.53642	4.93117	24.5061	29.4335	4.24743	6.08947	53.5775	70.14	556.567	666.058	368.437	445.194	172.161	234.598
2008	56	53.0299	11	6	9	8	12.9804	6.80087	6.95142	5.60494	3	29.6206	6	5.47457	62.4482	3.70816	2.8555	1.3725	5.2185	3.59773	666.125	457.492	208.632	31.3203	46.8288	13.5869	60.4157	47.3904	59.038	10.7546	16.7646	5.63976	8.82112	5.82384	9.03244	4.65906	7.06031	27.1015	32.4831	4.4794	6.56402	54.9479	72.7673	609.698	732.681	416.273	499.234	177.451	249.491
2009	58	55.3145	8	13	14	9	16.7158	8.79382	9.05471	7.34968	3	32.3431	6	5.77975	63.0336	3.71566	2.8615	1.3755	5.2295	3.6745	725.903	509.807	216.097	29.7693	48.9327	14.265	63.1976	49.5298	61.5064	14.4367	19.5969	7.56004	10.2256	7.71709	10.3881	6.15529	8.93519	29.5638	35.4445	4.70729	7.0093	56.0629	73.3476	663.558	799.981	463.504	554.686	180.657	260.383
2010	53	57.1357	19	11	8	4	18.0874	9.55541	9.91321	8.10091	7	35.0252	6	6.04343	62.9196	3.72318	2.8675	1.3785	5.2405	3.75412	786.556	564.943	221.614	28.1752	50.6352	14.8328	65.468	51.6087	63.2281	15.4777	21.3372	8.13627	11.1531	8.48588	11.5039	6.59758	9.39427	31.9096	38.5255	4.96001	7.45433	56.425	74.2301	722.269	865.529	516.205	617.613	182.944	268.507
2011	49	58.4376	14	10	4	14	17.9625	9.53072	9.96474	8.19892	2	37.6183	1	6.25827	62.1072	3.73074	2.8745	1.3815	5.2515	3.83722	846.388	621.38	225.008	26.5845	51.8867	15.2747	67.1614	53.2796	64.086	14.9349	21.1456	7.96312	11.0957	8.49063	11.4869	6.74566	9.58252	34.2056	41.401	5.10249	7.85755	55.2581	74.3784	781.394	929.846	571.046	678.996	183.903	275.2
2012	59	59.1785	7	16	8	5	14.8376	7.90822	8.33531	6.90619	9	40.0736	9	6.41834	60.605	3.73833	2.8805	1.3845	5.2625	3.92434	905.71	679.559	226.151	24.9695	52.6477	15.5775	68.2252	54.2564	65.0481	11.6332	17.9747	6.12564	9.47352	6.53074	9.78684	5.23283	8.43242	36.6271	44.0972	5.21235	8.12884	53.5099	70.3931	841.5	993.152	627.899	736.939	183.555	279.204
2013	67	59.329	15	20	12	6	18.7072	10.0176	10.6478	8.88525	8	42.3424	9	6.51851	58.422	3.74595	2.8865	1.3865	5.2735	4.01615	959.844	734.888	224.957	23.4368	52.8883	15.7308	68.6191	54.9551	65.3559	16.2093	22.2459	8.64903	11.7442	9.34633	12.1718	7.36749	10.8119	38.9719	46.6683	5.21324	8.38651	51.1151	68.4499	897.498	1052.62	680.181	794.625	181.935	276.302
2014	62	58.8695	18	13	16	8	19.759	10.6334	11.4027	9.58511	6	44.3781	6	6.55508	55.5667	3.75361	2.8935	1.3895	5.2855	4.11364	1013.12	791.757	221.365	21.8498	52.5859	15.7265	68.3123	54.1397	64.3314	17.8736	22.6297	9.62296	12.0486	10.3154	12.6965	8.09113	11.6681	40.981	49.0676	5.148	8.50071	48.0828	67.4735	948.542	1119.61	734.584	856.285	179.679	273.971
2015	53	57.7875	10	7	9	16	18.2427	9.86958	10.6838	9.04922	3	46.1359	8	6.52474	52.0479	3.76129	2.8995	1.3925	5.2965	4.21841	1064.88	849.545	215.338	20.2217	51.7244	15.5584	67.2827	53.3005	63.5584	16.2265	20.9273	8.84928	11.2206	9.58675	12.0358	7.5636	11.477	42.5477	50.9428	5.02637	8.5425	42.6723	65.7625	998.825	1180.68	791.102	916.881	170.867	278.109
2016	59	56.0763	17	6	12	9	16.5044	8.98106	9.82168	8.38565	8	47.5742	9	6.42543	47.8744	3.76901	2.9065	1.3955	5.3075	4.33279	1110.47	903.621	206.852	18.6274	50.2924	15.222	65.5144	50.7352	61.9674	12.9896	20.1065	7.20971	10.5497	7.99852	11.0031	6.60909	10.8541	43.9991	53.6536	4.82072	8.54205	34.5202	61.9231	1043.83	1224.92	845.33	971.215	156.564	281.172
2017	54	53.7334	14	10	14	6	16.2688	8.91065	9.85548	8.48654	9	48.6547	6	6.25546	43.0548	3.77676	2.9125	1.3985	5.3195	4.46025	1150.25	954.354	195.898	17.0309	48.2822	14.7142	62.9965	47.1527	60.3403	12.687	19.5684	7.19149	10.3861	8.36873	11.0401	6.88009	10.9236	45.3376	55.4064	4.57871	8.70803	24.934	61.4564	1081.29	1284.01	895.915	1021.5	144.92	282.923
2018	48	50.7593	9	5	7	16	14.5589	8.03451	9.00162	7.82371	6	49.3427	6	6.01369	37.5979	3.78454	2.9195	1.4015	5.3305	4.606	1186.59	1004.11	182.471	15.3779	45.6893	14.0328	59.7221	41.2244	59.583	10.1833	18.5396	5.93704	9.97713	7.02306	10.7452	5.96978	11.0483	45.9111	55.3555	4.20224	8.89495	13.0339	60.5303	1110.84	1342.8	946.996	1077.53	125.605	280.789
[truncated: 26 more columns]

## Sheet: PWID_defaultCD4
year	N_HIV_D	N_HIV_Obs_M	N_CD4_1_D	N_CD4_2_D	N_CD4_3_D	N_CD4_4_D	N_CD4_1_Obs_M	N_CD4_2_Obs_M	N_CD4_3_Obs_M	N_CD4_4_Obs_M	N_AIDS_D	N_AIDS_M	N_HIVAIDS_D	N_HIVAIDS_Obs_M	N_Inf_M	t_diag	t_diag_p50	t_diag_p25	t_diag_p75	D_Avg_Time	N_Alive	N_Alive_Diag_M	N_Und	N_Und_Alive_p	N_Und_CD4_3_M	N_Und_CD4_4_M	N_Und_CD4_3p4_M	N_HIV_Obs_M_LB	N_HIV_Obs_M_UB	N_CD4_1_Obs_M_LB	N_CD4_1_Obs_M_UB	N_CD4_2_Obs_M_LB	N_CD4_2_Obs_M_UB	N_CD4_3_Obs_M_LB	N_CD4_3_Obs_M_UB	N_CD4_4_Obs_M_LB	N_CD4_4_Obs_M_UB	N_AIDS_M_LB	N_AIDS_M_UB	N_HIVAIDS_Obs_M_LB	N_HIVAIDS_Obs_M_UB	N_Inf_M_LB	N_Inf_M_UB	N_Alive_LB	N_Alive_UB	N_Alive_Diag_M_LB	N_Alive_Diag_M_UB	N_Und_LB	N_Und_UB
1980	0	0.003211	0	0	0	0	0	0	0	0	0	0.003211	0	0.003211	1.55059	11.5671	10.8755	6.3895	17.2385	0.5	1.55045	0.003211	1.54724	99.7929	0.164979	0.037812	0.202791	0.000767	0.006963	0	0	0	0	0	0	0	0	0.000767	0.006963	0.000767	0.006963	0.475297	3.21261	0.475263	3.2123	0.000767	0.006963	0.474496	3.20534
1981	0	0.044345	0	0	0	0	0	0	0	0	0	0.044345	0	0.044345	4.88873	11.5671	10.8755	6.3895	17.2385	1.12085	6.43722	0.047556	6.38966	99.2612	0.901839	0.241991	1.14383	0.015565	0.089059	0	0	0	0	0	0	0	0	0.015565	0.089059	0.015565	0.089059	2.42462	8.80532	2.8992	12.0137	0.016332	0.096022	2.88287	11.9177
1982	0	0.173447	0	0	0	0	0	0	0	0	0	0.173447	0	0.173447	8.41805	11.5671	10.8755	6.3895	17.2385	1.59124	14.8476	0.221003	14.6266	98.5115	2.35921	0.714771	3.07398	0.079617	0.321561	0	0	0	0	0	0	0	0	0.079617	0.321561	0.079617	0.321561	5.54015	13.2113	8.43584	25.2109	0.095949	0.417583	8.33989	24.7933
1983	0	0.429146	0	0	0	0	0	0	0	0	0	0.429146	0	0.429146	11.9196	11.5671	10.8755	6.3895	17.2385	2.04276	26.7483	0.650149	26.0981	97.5694	4.60074	1.53607	6.13682	0.237584	0.737595	0	0	0	0	0	0	0	0	0.237584	0.737595	0.237584	0.737595	9.27002	16.416	17.8047	41.6917	0.333533	1.15518	17.4712	40.5366
1984	1	0.024654	0	0	0	0	0	0	0	0	0	0.860189	0	0.749472	15.1743	16.9313	0.0005	0.0005	0.0005	26.1501	41.8895	0.674803	41.2147	98.3891	7.9409	2.25796	10.1989	0.017033	7.33367	0	0	0	0	0	0	0	0	0.546944	1.38164	0.476433	1.14502	13.2434	19.1734	31.2816	60.4339	0.503017	8.54022	30.3113	55.4005
1985	80	0.000715	0	0	0	0	0	0	0	0	1	1.45283	1	1.12842	17.9632	16.9313	0.0005	0.0005	0.0005	1393.77	58.8029	-0.324482	59.1274	100.552	12.201	3.40324	15.6043	0	9.03615	0	0	0	0	0	0	0	0	1.02761	2.18702	0.77945	1.55191	16.0858	21.2892	47.4556	79.2714	-0.496983	16.5446	45.6221	75.462
1986	104	0.168196	0	0	0	0	0	0	0	0	0	2.21945	0	1.66851	20.0673	16.9313	0.0005	0.0005	0.0005	12.6384	74.7966	-4.15629	78.9529	105.557	17.2723	4.89739	22.1697	0.14967	11.4263	0	0	0	0	0	0	0	0	1.69222	3.14503	1.23117	2.17631	17.8232	23.62	63.3963	96.245	-4.3522	23.2039	62.9742	94.3349
1987	66	63.0829	0	0	0	0	0	0	0	0	2	3.33716	1	1.42209	21.2676	1.01934	0.8085	0.4445	1.3685	3.07646	84.0015	46.9266	37.0749	44.136	7.31422	2.03934	9.35356	50.1441	72.8273	0	0	0	0	0	0	0	0	2.74861	4.37253	0.948698	1.97548	18.1377	24.449	71.9694	108.083	36.4623	72.1396	24.2041	53.0437
1988	31	32.589	0	0	0	0	0	0	0	0	1	4.41069	0	0.656504	21.3867	1.01934	0.8085	0.4445	1.3685	2.66626	99.3592	73.5156	25.8437	26.0103	4.33875	1.12601	5.46476	27.5171	37.6879	0	0	0	0	0	0	0	0	3.78776	5.58036	0.316531	1.15032	17.3562	24.9446	85.9479	124.014	61.0989	96.529	17.4768	37.4422
1989	26	24.1604	0	0	0	0	0	0	0	0	4	5.57188	0	0.407743	20.5104	1.01934	0.8085	0.4445	1.3685	2.06048	112.852	90.6759	22.1757	19.6503	3.40077	0.832149	4.23292	20.1917	27.4791	0	0	0	0	0	0	0	0	4.90317	6.91946	0.215503	0.814154	16.0646	23.8496	98.2484	139.206	77.7121	114.622	15.7728	29.6121
1990	22	21.0704	0	0	0	0	0	0	0	0	12	6.76349	2	0.323097	18.8944	1.01934	0.8085	0.4445	1.3685	1.74757	119.732	99.7464	19.9854	16.6918	2.9821	0.712082	3.69418	16.6118	24.682	0	0	0	0	0	0	0	0	6.0117	8.16868	0.178049	0.603802	14.4424	21.9706	103.501	149.086	84.1235	126.03	14.2374	25.7684
1991	13	18.94	0	0	0	0	0	0	0	0	14	7.91939	0	0.28188	16.8027	1.01934	0.8085	0.4445	1.3685	1.64534	123.522	105.686	17.8358	14.4393	2.65625	0.63052	3.28677	14.8325	22.2077	0	0	0	0	0	0	0	0	7.09825	9.38169	0.158691	0.482734	12.6633	19.6973	106.121	155.444	87.8525	134.904	12.6238	23.1781
1992	12	16.7816	0	0	0	0	0	0	0	0	8	8.98242	0	0.248995	14.4995	1.01934	0.8085	0.4445	1.3685	1.62778	127.011	111.468	15.5427	12.2373	2.32752	0.552848	2.88037	13.045	19.6645	0	0	0	0	0	0	0	0	8.06253	10.6111	0.14058	0.402676	10.9009	17.0304	106.658	161.001	91.5532	143.223	10.954	20.2838
1993	13	14.5256	0	0	0	0	0	0	0	0	13	9.90676	0	0.216592	12.2486	1.01934	0.8085	0.4445	1.3685	1.63744	123.25	109.994	13.256	10.7554	1.99679	0.475365	2.47216	11.2766	17.0662	0	0	0	0	0	0	0	0	8.94359	11.671	0.120822	0.341879	9.329	14.3015	100.531	158.766	88.2985	143.804	9.38718	17.2593
1994	12	12.3479	0	0	0	0	0	0	0	0	19	10.6609	0	0.185073	10.3141	1.01934	0.8085	0.4445	1.3685	1.65039	117.555	106.341	11.2141	9.5394	1.69233	0.403497	2.09582	9.69446	14.3222	0	0	0	0	0	0	0	0	9.50493	12.5233	0.10377	0.292306	8.12114	11.8087	93.1121	153.224	83.1754	141.674	7.86874	14.4003
1995	11	10.4891	0	0	0	0	0	0	0	0	7	11.2301	0	0.157261	8.95951	1.01934	0.8085	0.4445	1.3685	1.65147	108.508	98.8305	9.67755	8.91874	1.44995	0.345275	1.79523	8.47907	11.9219	0	0	0	0	0	0	0	0	9.94805	13.046	0.0891	0.25267	7.45067	10.2018	83.1458	143.911	74.4601	135.133	6.90706	12.3539
1996	9	9.0828	0	0	0	0	0	0	0	0	11	11.6183	1	0.13727	8.37948	1.01934	0.8085	0.4445	1.3685	1.62986	105.881	96.9133	8.96818	8.47002	1.3255	0.314159	1.63966	7.66775	10.4044	0	0	0	0	0	0	0	0	10.2879	13.338	0.081207	0.22523	7.11151	9.72437	79.7709	141.011	71.4771	133.62	6.34865	11.591
1997	10	8.39719	0	0	0	0	0	0	0	0	8	11.847	0	0.129704	8.50433	1.04898	0.8295	0.4545	1.4095	1.59006	104.38	95.3105	9.0696	8.68901	1.3255	0.312606	1.6381	7.05052	9.75424	0	0	0	0	0	0	0	0	10.4198	13.5334	0.076136	0.21374	6.94905	10.201	77.7434	139.209	69.5821	131.9	6.39267	11.9168
1998	8	8.4144	0	0	0	0	0	0	0	0	4	11.9493	0	0.133428	9.15474	1.08095	0.8525	0.4655	1.4525	1.55654	104.529	94.7249	9.80406	9.37928	1.42581	0.33523	1.76104	6.90606	10.0312	0	0	0	0	0	0	0	0	10.4389	13.5833	0.078067	0.218054	7.27061	11.183	77.8731	139.018	69.2497	130.74	6.87645	13.0038
1999	12	8.92374	0	0	0	0	0	0	0	0	7	11.9632	0	0.146494	10.149	1.11553	0.8775	0.4775	1.4995	1.54014	105.671	94.6486	11.0228	10.4312	1.60783	0.377964	1.98579	7.19187	10.8247	0	0	0	0	0	0	0	0	10.4183	13.5542	0.085744	0.234892	7.92803	12.4991	79.194	139.476	69.2247	129.682	7.60847	14.7818
2000	6	9.74691	0	0	0	0	0	0	0	0	5	11.9273	0	0.167232	11.3053	1.15306	0.9035	0.4905	1.5515	1.54384	105.969	93.3955	12.5739	11.8656	1.85262	0.436721	2.28934	7.77408	11.9161	0	0	0	0	0	0	0	0	10.4222	13.4519	0.098356	0.256476	8.77317	13.9239	78.9043	138.123	68.208	128.516	8.60289	16.8968
2001	7	10.7161	0	0	0	0	0	0	0	0	8	11.876	1	0.193844	12.442	1.19392	0.9325	0.5045	1.6075	1.56578	111.403	97.1117	14.2912	12.8284	2.13862	0.506803	2.64542	8.51405	13.0977	0	0	0	0	0	0	0	0	10.4396	13.2853	0.112631	0.300228	9.65788	15.2317	82.2769	143.218	71.8154	132.436	9.74136	19.1101
2002	14	11.6691	0	0	0	0	0	0	0	0	4	11.8367	0	0.22422	13.3773	1.23857	0.9645	0.5195	1.6685	1.60305	116.77	100.781	15.9894	13.6931	2.4404	0.582553	3.02295	9.27666	14.1688	0	0	0	0	0	0	0	0	10.4904	13.1719	0.12497	0.341408	10.5467	16.2218	86.8199	148.514	73.1266	136.166	10.6109	21.3806
2003	11	12.4484	0	0	0	0	0	0	0	0	6	11.8266	0	0.255791	13.931	1.28757	0.9995	0.5365	1.7355	1.6539	126.69	109.229	17.4608	13.7823	2.72767	0.657066	3.38473	9.92987	14.935	0	0	0	0	0	0	0	0	10.5114	13.1466	0.136488	0.380665	11.2498	16.6211	92.6844	160.035	81.5716	144.457	11.277	23.4704
2004	15	12.9111	0	1	1	0	0.855765	0.391729	0.321266	0.114649	4	11.8511	0	0.285525	13.9921	1.34156	1.0375	0.5545	1.8105	1.71783	139.669	121.14	18.5292	13.2665	2.96974	0.723024	3.69277	10.3534	15.5414	0	2.56583	0	1.16412	0	0.957142	0	0.351669	10.426	13.2798	0.145288	0.41597	11.125	16.5087	101.928	174.402	93.5775	155.901	11.6192	25.0571
2005	19	12.9871	3	2	1	1	2.35349	1.08571	0.899997	0.331011	4	11.9046	0	0.310812	13.6159	1.40134	1.0805	0.5745	1.8935	1.79285	151.272	132.127	19.1443	12.6556	3.15079	0.776069	3.92686	10.5533	15.3688	0.780228	4.45325	0.349069	2.0007	0.277387	1.59887	0.087373	0.630447	10.3676	13.2629	0.146894	0.453009	10.9772	15.8331	110.308	188.48	101.706	167.027	11.403	26.0642
2006	7	12.6987	2	1	0	1	3.52707	1.64086	1.37644	0.523191	4	11.9741	0	0.33043	12.9013	1.46789	1.1285	0.5965	1.9865	1.8767	163.158	143.826	19.3323	11.8488	3.26843	0.814968	4.0834	10.5514	14.748	1.70967	5.66365	0.797927	2.56771	0.672432	2.11806	0.204069	0.788788	10.3302	13.4192	0.140528	0.481009	10.3139	14.7288	119.614	201.902	110.925	180.483	10.3306	26.5062
2007	13	12.1112	3	1	2	2	3.57518	1.6782	1.42602	0.561804	0	12.0427	0	0.344215	11.9474	1.54241	1.1815	0.6205	2.0905	1.96876	172.091	152.937	19.1534	11.1298	3.32734	0.840305	4.16765	9.9873	13.9719	1.87262	5.41329	0.855893	2.56861	0.698645	2.18512	0.243662	0.873844	10.3212	13.5604	0.13104	0.499119	9.94059	13.5752	126.666	211.313	118.04	191.089	9.04652	26.4408
2008	11	11.3039	2	0	1	0	1.60308	0.759648	0.654519	0.268127	2	12.0919	1	0.352627	10.8536	1.62638	1.2415	0.6485	2.2075	2.06948	179.929	161.241	18.6876	10.3861	3.33656	0.853829	4.19038	9.39716	13.1928	0	3.51273	0	1.63457	0	1.38447	0	0.589069	10.3455	13.6564	0.119457	0.51331	8.56715	12.8991	133.318	219.176	124.884	200.335	8.43414	25.9502
2009	10	10.3588	3	2	1	3	4.81774	2.30586	2.0165	0.862144	2	12.1048	1	0.356567	9.71888	1.72171	1.3105	0.6795	2.3425	2.17942	186.632	168.6	18.0319	9.66177	3.30881	0.858282	4.16709	8.27389	12.1868	3.81289	5.98221	1.88127	2.77538	1.56906	2.38082	0.500944	1.14766	10.3756	13.6851	0.106169	0.520728	7.20769	12.1467	139.453	224.886	131.32	208.071	8.13315	25.1355
2010	9	9.35646	2	0	2	0	2.84907	1.37782	1.22403	0.548483	3	12.0677	3	0.357361	8.64249	1.83081	1.3905	0.7155	2.4965	2.29841	195.259	177.956	17.3022	8.86117	3.26089	0.857484	4.11838	7.17068	11.3795	1.25144	4.49281	0.602345	2.15098	0.490071	1.83651	0.210705	0.852059	10.2315	13.6499	0.093653	0.536154	6.25856	11.2499	147.988	232.274	140.242	216.708	7.1751	24.1512
2011	8	8.37297	0	0	0	3	1.40593	0.687042	0.620354	0.292724	0	11.9718	0	0.356823	7.7214	1.95683	1.4825	0.7565	2.6755	2.42444	201.964	185.329	16.6349	8.23656	3.2145	0.856583	4.07108	6.20668	10.6843	0	2.83435	0	1.31858	0	1.20196	0	0.636209	10.0729	13.4791	0.080995	0.56923	5.23695	10.4183	153.608	240.736	147.574	223.751	6.22567	23.0341
2012	6	7.47353	1	2	1	1	3.27518	1.61661	1.48338	0.741073	1	11.8143	1	0.357289	7.00748	2.10393	1.5915	0.8055	2.8845	2.55342	208.956	192.803	16.1531	7.73038	3.19324	0.861553	4.0548	5.47717	9.67993	2.28261	4.417	1.16246	2.08834	1.1028	1.93775	0.377405	1.02298	9.93925	13.267	0.069322	0.559001	4.49205	9.58292	158.507	248.845	153.58	231.348	5.3561	23.4782
2013	7	6.69218	1	1	1	1	1.63715	0.815673	0.760145	0.404771	1	11.5977	0	0.361142	6.48269	2.27775	1.7215	0.8635	3.1345	2.68282	215.423	199.495	15.9277	7.39369	3.21528	0.877549	4.09283	4.74759	8.60775	0	2.7853	0	1.40324	0	1.31199	0	0.719182	9.76793	12.9747	0.058784	0.580455	3.91679	9.64531	164.441	254.803	157.239	237.956	4.54911	25.9483
2014	4	6.02977	1	1	1	0	1.88616	0.948043	0.896757	0.5136	0	11.3289	0	0.370354	6.11801	2.48605	1.8795	0.9335	3.4345	2.8134	221.524	205.525	15.9996	7.2225	3.29419	0.908876	4.20307	4.2104	7.79337	0.813332	3.314	0.397179	1.59788	0.31404	1.37792	0.141635	0.888228	9.56044	12.6094	0.04915	0.646068	3.43556	10.1569	169.936	263.398	160.678	243.761	3.77708	29.4731
2015	7	5.46888	0	0	0	7	2.21258	1.12162	1.07649	0.671522	0	11.0172	0	0.386663	5.88438	2.73984	2.0755	1.0205	3.8015	2.94822	227.392	210.994	16.398	7.21136	3.44195	0.959621	4.40157	3.71095	7.24757	1.50808	3.12146	0.760224	1.54418	0.727533	1.42714	0.22933	1.07218	9.35033	12.3568	0.041651	0.764579	3.34999	11.5342	175.035	269.819	164.171	250.329	3.3187	34.3691
2016	7	4.98251	4	1	0	3	2.58926	1.32387	1.28931	0.891825	2	10.6734	1	0.411815	5.75275	3.0552	2.3245	1.1305	4.2605	3.0924	233.126	215.976	17.1501	7.35658	3.67101	1.03422	4.70523	3.27209	7.02085	0.8214	2.9736	0.449971	1.47385	0.490413	1.37441	0.175642	1.18106	9.09682	12.153	0.04349	0.92979	2.83694	13.6836	179.761	280.211	167.969	256.199	3.68667	41.1125
2017	4	4.53778	0	0	2	3	2.10581	1.08642	1.0743	0.84596	0	10.3088	0	0.447794	5.69406	3.45657	2.6475	1.2775	4.8485	3.25346	237.801	219.514	18.2867	7.68991	3.99592	1.13799	5.13391	2.59539	7.24988	0	2.93307	0	1.43785	0	1.33064	0	1.21308	8.75616	11.9189	0.047898	1.16078	2.03708	17.3532	183.112	293.118	171.294	260.263	2.79481	51.1546
2018	4	4.09706	1	1	0	0	0.710388	0.370118	0.372052	0.347447	0	9.93392	0	0.497046	5.67927	3.98262	3.0855	1.4795	5.6225	3.44227	243.458	223.611	19.8469	8.15211	4.43501	1.2777	5.71271	1.66155	7.33587	0	1.94413	0	0.940235	0	0.859739	0	1.21083	8.42899	11.6572	0.038204	1.54296	0.71492	21.6651	184.834	307.572	176.343	264.547	1.51319	64.1243
[truncated: 26 more columns]
