# Supplementary material for: Monitoring progress towards the first UNAIDS 90-90-90 target in key populations living with HIV in Norway
Source: BMC Infect Dis. 2020 Jun 26;20:451. doi: 10.1186/s12879-020-05178-1 (PMC7318482; doi:10.1186/s12879-020-05178-1)
Supplement: Supplementary file 6 — Additional file 6. All estimates from the ECDC HIV modelling tool, overall and by key subpopulation, including the Danish CD4 proxy. [file 12879_2020_5178_MOESM6_ESM.xlsx]

## Sheet: Overall_CD4proxy
year	N_HIV_D	N_HIV_Obs_M	N_CD4_1_D	N_CD4_2_D	N_CD4_3_D	N_CD4_4_D	N_CD4_1_Obs_M	N_CD4_2_Obs_M	N_CD4_3_Obs_M	N_CD4_4_Obs_M	N_AIDS_D	N_AIDS_M	N_HIVAIDS_D	N_HIVAIDS_Obs_M	N_Inf_M	t_diag	t_diag_p50	t_diag_p25	t_diag_p75	D_Avg_Time	N_Alive	N_Alive_Diag_M	N_Und	N_Und_Alive_p	N_Und_CD4_3_M	N_Und_CD4_4_M	N_Und_CD4_3p4_M	N_HIV_Obs_M_LB	N_HIV_Obs_M_UB	N_CD4_1_Obs_M_LB	N_CD4_1_Obs_M_UB	N_CD4_2_Obs_M_LB	N_CD4_2_Obs_M_UB	N_CD4_3_Obs_M_LB	N_CD4_3_Obs_M_UB	N_CD4_4_Obs_M_LB	N_CD4_4_Obs_M_UB	N_AIDS_M_LB	N_AIDS_M_UB	N_HIVAIDS_Obs_M_LB	N_HIVAIDS_Obs_M_UB	N_Inf_M_LB	N_Inf_M_UB	N_Alive_LB	N_Alive_UB	N_Alive_Diag_M_LB	N_Alive_Diag_M_UB	N_Und_LB	N_Und_UB
1980	0	0.055174	0	0	0	0	0	0	0	0	0	0.055174	0	0.055174	25.087	11.5671	10.8755	6.3895	17.2385	0.5	25.0846	0.055174	25.0294	99.78	2.73032	0.628977	3.35929	0.044972	0.070592	0	0	0	0	0	0	0	0	0.044972	0.070592	0.044972	0.070592	20.6535	31.9032	20.6515	31.9001	0.044972	0.070592	20.6063	31.8294
1981	0	0.688238	0	0	0	0	0	0	0	0	0	0.688238	0	0.688238	65.376	11.5671	10.8755	6.3895	17.2385	1.15428	90.4302	0.743412	89.6868	99.1779	13.0828	3.56971	16.6525	0.569042	0.870893	0	0	0	0	0	0	0	0	0.569042	0.870893	0.569042	0.870893	55.2028	81.1012	75.673	112.963	0.614198	0.941535	75.0622	112.021
1982	0	2.41458	0	0	0	0	0	0	0	0	0	2.41458	0	2.41458	92.4452	11.5671	10.8755	6.3895	17.2385	1.66756	182.769	3.15799	179.611	98.2721	30.1957	9.42614	39.6218	2.02385	3.01242	0	0	0	0	0	0	0	0	2.02385	3.01242	2.02385	3.01242	81.2328	111.05	156.817	223.88	2.63478	3.95396	154.182	219.926
1983	0	5.37524	0	0	0	0	0	0	0	0	2	5.37524	0	5.37524	108.438	11.5671	10.8755	6.3895	17.2385	2.1805	288.97	6.53323	282.437	97.7391	52.3219	18.2313	70.5533	4.59612	6.60239	0	0	0	0	0	0	0	0	4.59612	6.60239	4.59612	6.60239	99.5961	126.03	254.21	346.892	5.23075	8.55635	248.979	338.335
1984	13	6.28723	0	0	0	0	0	0	0	0	4	9.7511	3	8.41697	115.5	14.3781	0.0005	0.0005	0.0005	3.34627	404.099	12.8205	391.279	96.8274	79.8432	23.6942	103.537	0.132953	36.8159	0	0	0	0	0	0	0	0	8.49846	11.7627	7.40873	10.0641	109.805	129.538	365.185	473.85	6.12911	42.8653	354.818	451.052
1985	207	8.2266	0	0	0	0	0	0	0	0	14	14.9597	15	11.2261	115.773	14.3781	0.0005	0.0005	0.0005	3.92791	508.377	10.0471	498.33	98.0237	109.671	31.8062	141.477	0	46.8842	0	0	0	0	0	0	0	0	13.3123	17.7132	9.92469	13.0235	110.569	127.829	471.091	590.746	-4.87089	78.5944	449.526	560.168
1986	188	11.9168	0	0	0	0	0	0	0	0	21	20.8539	8	14.8715	111.402	14.3781	0.0005	0.0005	0.0005	4.40947	599.123	1.96387	597.16	99.6722	140.08	41.2589	181.339	1.6602	57.4473	0	0	0	0	0	0	0	0	18.9594	24.599	12.6333	17.1725	104.693	126.771	566.148	682.778	-23.2107	116.216	519.977	676.472
1987	183	149.311	0	0	0	0	0	0	0	0	35	27.5406	13	17.0436	104.531	3.85177	2.9755	1.4285	5.4295	3.72289	668.902	117.275	551.628	82.4676	134.597	40.4557	175.053	131.655	167.81	0	0	0	0	0	0	0	0	25.6307	31.819	14.266	19.6452	94.6494	119.143	632.298	748.096	86.5527	217.063	497.981	618.546
1988	135	139.376	0	0	0	0	0	0	0	0	25	34.107	14	16.5906	97.1775	3.85177	2.9755	1.4285	5.4295	4.12447	732.348	223.651	508.698	69.4612	127.333	38.8784	166.211	125.612	150.825	0	0	0	0	0	0	0	0	32.3156	38.6413	14.2621	19.2491	85.1231	113.79	699.449	810.027	191.478	310.991	466.376	566.148
1989	124	129.497	0	0	0	0	0	0	0	0	41	40.4084	9	15.842	90.5715	3.85177	2.9755	1.4285	5.4295	4.45054	789.221	320.148	469.074	59.435	119.278	36.8332	156.111	118.284	137.749	0	0	0	0	0	0	0	0	38.3609	44.9088	14.0373	18.6429	77.3962	106.619	750.275	876.751	286.414	410.804	423.06	528.23
1990	84	120.08	0	0	0	0	0	0	0	0	58	46.2677	9	14.9483	85.4302	3.85177	2.9755	1.4285	5.4295	4.70614	826.992	393.228	433.765	52.4509	111.198	34.5919	145.79	111.219	126.923	0	0	0	0	0	0	0	0	44.1031	50.5551	13.4247	17.4429	72.6202	98.2437	793.034	920.491	355.47	488.081	384.446	495.305
1991	130	111.535	0	0	0	0	0	0	0	0	56	51.557	18	14.0137	82.4464	3.85177	2.9755	1.4285	5.4295	4.89161	863.821	459.762	404.059	46.7757	103.707	32.38	136.087	104.1	119.535	0	0	0	0	0	0	0	0	49.5196	56.3612	12.3344	16.1694	70.2768	93.0322	824.851	959.624	418.984	558.771	360.189	466.274
1992	97	104.294	0	0	0	0	0	0	0	0	51	56.2293	13	13.1251	82.3133	3.85177	2.9755	1.4285	5.4295	5.00192	880.556	499.057	381.499	43.3248	97.3352	30.3877	127.723	96.7194	112.547	0	0	0	0	0	0	0	0	54.3121	61.381	11.4301	15.1904	70.54	93.4776	836.847	974.807	458.891	601.365	336.283	437.661
1993	105	98.8204	0	0	0	0	0	0	0	0	63	60.3187	15	12.3584	85.7236	3.85177	2.9755	1.4285	5.4295	5.02793	896.734	528.877	367.857	41.0219	92.5796	28.7836	121.363	91.2044	105.757	0	0	0	0	0	0	0	0	58.205	65.6039	10.8256	14.4678	74.2651	99.3134	846.145	985.685	486.707	632.978	327.411	417.015
1994	84	95.6059	0	0	0	0	0	0	0	0	73	63.9345	15	11.781	93.3703	3.85177	2.9755	1.4285	5.4295	4.96086	926.585	561.483	365.102	39.403	89.9337	27.7262	117.66	87.7827	103.237	0	0	0	0	0	0	0	0	61.511	69.1131	10.2741	13.7845	82.3552	107.923	870.783	1023.65	520.832	665.43	323.544	410.763
1995	99	95.1774	0	0	0	0	0	0	0	0	67	67.2585	10	11.4587	105.944	3.85177	2.9755	1.4285	5.4295	4.79985	967.024	591.66	375.363	38.8163	89.9027	27.3715	117.274	87.2727	103.705	0	0	0	0	0	0	0	0	64.5439	72.0809	9.94846	13.2465	94.61	119.958	910.054	1071.87	546.339	693.305	339.437	418.655
1996	105	98.3011	0	0	0	0	0	0	0	0	54	70.5469	14	11.4221	123.762	3.85177	2.9755	1.4285	5.4295	4.56541	1033.28	632.962	400.32	38.7426	92.8843	27.5896	120.474	90.7637	108.55	0	0	0	0	0	0	0	0	67.5502	75.7985	10.1001	13.0249	112.097	135.951	978.273	1127.31	582.09	730.058	359.651	445.487
1997	106	105.114	0	0	0	0	0	0	0	0	35	74.0935	10	11.612	145.715	3.85495	2.9755	1.4285	5.4305	4.28899	1151.48	711.075	440.41	38.2471	99.0945	28.432	127.527	97.709	115.638	0	0	0	0	0	0	0	0	70.5786	78.7811	10.3421	13.364	133.774	157.034	1092.2	1250.93	656.314	812.898	398.258	494.099
1998	86	115.488	0	0	0	0	0	0	0	0	36	78.187	17	12.0993	170.102	3.85884	2.9765	1.4285	5.4325	4.01384	1289.05	794.563	494.491	38.3608	108.509	30.0599	138.569	107.218	125.419	0	0	0	0	0	0	0	0	74.3005	82.75	10.7485	13.9406	158.107	180.449	1225.37	1393.44	740.637	906.317	452.629	542.67
1999	140	129.194	0	0	0	0	0	0	0	0	29	83.0991	13	12.9094	195.209	3.86341	2.9775	1.4295	5.4355	3.78391	1462.69	902.757	559.936	38.2812	120.773	32.4203	153.193	120.198	137.913	0	0	0	0	0	0	0	0	79.181	87.9693	11.4986	14.7703	182.963	205.103	1395.01	1571.41	847.671	1014.34	515.131	612.858
2000	162	145.594	0	0	0	0	0	0	0	0	35	89.0381	19	13.9973	219.32	3.86863	2.9795	1.4305	5.4395	3.61992	1651.4	1018.35	633.045	38.3339	135.25	35.3416	170.591	137.022	153.862	0	0	0	0	0	0	0	0	84.8607	94.1559	12.5516	15.968	207.659	229.723	1578.32	1763.74	958.351	1120.98	585.152	690.879
2001	144	163.764	0	0	0	0	0	0	0	0	33	96.1264	10	15.2785	240.721	3.8745	2.9815	1.4305	5.4445	3.52342	1869.44	1160.12	709.328	37.9433	151.081	38.5848	189.666	154.673	173.652	0	0	0	0	0	0	0	0	91.9914	101.591	13.8263	17.0347	230.331	255.074	1791.56	1984.63	1095.74	1259.94	659.841	762.987
2002	187	182.57	0	0	0	0	0	0	0	0	34	104.383	13	16.6462	257.697	3.88099	2.9845	1.4315	5.4505	3.48641	2110.41	1326.69	783.72	37.136	167.237	41.8731	209.11	173.255	192.259	0	0	0	0	0	0	0	0	100.123	109.962	15.2169	18.3299	246.393	274.674	2027.97	2228.38	1258.64	1429.11	734.017	838.515
2003	217	200.73	0	0	0	0	0	0	0	0	53	113.709	15	17.9814	268.55	3.8881	2.9865	1.4325	5.4575	3.4988	2364.16	1513.42	850.747	35.9851	182.561	44.9125	227.474	191.329	209.702	0	0	0	0	0	0	0	0	109.185	119.168	16.5882	19.6167	255.983	285.806	2277.85	2482.41	1442.47	1618.57	800.686	908.639
2004	237	216.882	27	14	33	31	34.9027	20.9548	21.2672	18.9889	36	123.889	21	19.1623	272.295	3.89583	2.9905	1.4345	5.4655	3.55196	2628.61	1723.3	905.315	34.4408	195.883	47.4201	243.303	207.926	227.156	29.0781	39.4182	17.3175	24.6899	17.9525	24.2224	15.9542	21.9158	118.916	128.752	17.5482	20.7991	260.348	289.549	2539.55	2756.35	1650.24	1835.74	856.385	964.012
2005	198	229.85	27	20	23	19	35.3749	21.7214	22.2289	19.9799	32	134.6	10	20.0817	269.67	3.90415	2.9945	1.4355	5.4745	3.6379	2888.4	1944.15	944.25	32.6911	206.29	49.1851	255.476	221.26	241.964	28.9752	40.455	17.5394	25.1385	18.1036	25.1885	15.8126	23.1703	129.249	139.539	18.2695	21.8607	259.688	285.192	2795.19	3027.48	1862.8	2064	894.186	1009.7
2006	240	238.912	26	18	16	25	29.3004	18.4096	19.0225	17.2069	32	145.462	19	20.6692	261.863	3.91306	2.9985	1.4365	5.4845	3.74863	3145.35	2179.06	966.29	30.7212	213.248	50.095	263.343	230.361	250.905	23.6296	36.1928	14.8988	22.5905	15.1732	23.8278	13.525	21.4873	139.452	150.613	18.6028	22.6719	250.857	275.396	3043.72	3285.38	2089.93	2297.83	914.789	1028.85
2007	228	243.78	45	25	36	31	47.0258	30.237	31.5663	28.7178	11	156.074	6	20.894	250.064	3.92256	3.0025	1.4385	5.4955	3.87729	3387.49	2415.84	971.653	28.6835	216.561	50.1276	266.688	235.979	255.928	42.3586	53.6025	27.1568	34.1534	28.3055	35.0119	26.0604	33.1991	149.719	161.514	18.5849	23.0649	236.626	264.101	3275.95	3527.58	2320.34	2540.08	923.213	1029.67
2008	266	244.522	53	42	52	37	55.3668	36.4281	38.4248	35.13	19	166.05	17	20.7602	235.464	3.93265	3.0075	1.4395	5.5065	4.01849	3613.04	2651.36	961.68	26.6169	216.323	49.3332	265.656	236.965	255.003	51.239	61.3195	32.8132	41.6966	36.0483	42.5879	32.6268	39.2775	159.461	171.999	18.264	23.1392	218.868	250.786	3491.86	3763.72	2551.34	2780.3	914.301	1014.1
2009	258	241.478	51	56	47	53	62.5792	42.1202	44.8751	41.1926	19	175.046	18	20.2991	219.254	3.94332	3.0125	1.4415	5.5195	4.16791	3819.4	2880.84	938.561	24.5735	212.865	47.8173	260.682	233.736	250.782	57.6683	66.8904	38.3778	45.4629	41.0466	48.9488	36.7025	45.5211	168.346	181.34	17.6885	22.8908	200.563	235.124	3689.3	3977.25	2778.51	3013.74	886.255	991.148
2010	236	235.206	53	38	46	50	59.753	41.1275	44.2275	40.7234	24	182.78	19	19.5616	202.623	3.95456	3.0185	1.4435	5.5325	4.32163	4016.16	3111.04	905.116	22.5368	206.695	45.7231	252.418	225.791	245.068	54.7868	64.6109	37.5412	44.9382	39.9932	48.1755	36.8287	44.9349	176.099	189.162	16.7594	22.4278	181.77	218.426	3869.68	4178.02	3008.87	3247.19	842.779	966.258
2011	234	226.418	54	53	35	59	58.5568	41.1955	44.67	41.2181	19	189.051	9	18.6117	186.734	3.96639	3.0245	1.4455	5.5465	4.47541	4191.07	3326.46	864.611	20.6298	198.462	43.2174	241.68	216.083	237.316	52.4774	63.3936	37.2777	44.1157	40.4257	49.1504	37.2012	45.3354	182.027	196.002	15.9269	21.6291	165.286	200.836	4038.29	4365.41	3224.38	3465.2	795.912	938.949
2012	198	215.918	51	25.5882	28	26	45.861	32.9573	35.986	33.2433	25	193.747	23	17.5212	172.147	3.9788	3.0305	1.4475	5.5615	4.6243	4360.45	3540.38	820.067	18.8069	188.847	40.4678	229.314	204.369	227.165	39.6694	50.5872	28.3668	36.4962	31.022	40.4842	29.8087	37.0769	187.017	201.478	14.9758	20.6086	151.443	184.614	4202.65	4523.44	3431.95	3681.08	750.494	897.282
2013	196	204.4	46	37	39	38	52.6662	38.6383	42.4183	39.1942	29	196.836	22	16.3529	158.494	3.99179	3.0375	1.4495	5.5775	4.7648	4512.22	3738.78	773.44	17.141	178.392	37.6065	215.999	191.272	215.352	47.5216	57.3904	34.714	42.0361	37.4936	47.0681	35.1509	43.51	189.239	204.683	13.9551	19.4293	139.166	170.164	4351.07	4673.87	3615.36	3880.85	705.962	841.936
2014	193	192.325	52	39	41	19	47.7349	35.7374	39.392	36.377	18	198.345	25	15.1554	145.262	4.00537	3.0445	1.4515	5.5945	4.8964	4652.81	3927.11	725.709	15.5972	167.458	34.7216	202.18	178.349	201.588	43.1453	53.7004	31.3197	39.1956	35.3847	44.0149	32.9019	40.7376	190.875	206.024	12.8977	18.1847	129.248	157.512	4487.27	4812.78	3789.26	4069.95	653.452	792.37
2015	175	179.932	46	31	32	37	46.7559	35.7165	39.4876	36.4213	11	198.334	22	13.9569	131.934	4.01953	3.0515	1.4545	5.6115	5.02174	4782.13	4105.04	677.095	14.1589	156.236	31.8614	188.097	166.346	188.545	41.5711	51.6611	31.9951	38.9403	35.1456	43.7751	31.8565	40.0447	190.175	206.037	11.8229	16.9651	111.498	150.475	4606.05	4937.79	3954.7	4248.08	614.456	734.633
2016	182	167.289	56	35	39	30	44.3721	34.5914	38.3406	35.3045	16	196.885	20	12.773	117.995	4.03429	3.0595	1.4565	5.6305	5.14631	4896.57	4269.33	627.238	12.8098	144.776	29.0415	173.817	154.211	175.945	38.7933	49.5696	30.1556	38.191	33.6953	43.1458	31.5736	39.0088	188.016	204.699	10.7377	15.5451	87.2553	146.693	4715.93	5050.98	4109.91	4411.97	563.483	686.285
2017	159	154.324	46	32	41	20	38.8912	30.9576	34.4068	31.6208	18	194.082	13	11.6049	102.932	4.04965	3.0675	1.4595	5.6495	5.27897	4994.99	4419.65	575.335	11.5182	133.011	26.2524	159.264	139.296	165.762	33.7874	44.1726	25.7917	35.2148	30.6947	39.2442	27.4015	35.5955	185.197	201.02	9.73893	14.214	59.8922	144.806	4817.58	5153.26	4256.16	4558.05	499.656	649.742
2018	130	140.857	35	20	27	26	33.0292	26.8702	29.9776	27.4941	12	189.999	10	10.4451	86.2292	4.06562	3.0765	1.4625	5.6695	5.43283	5079.75	4559.51	520.246	10.2416	120.786	23.4663	144.252	120.654	160.646	26.2173	42.5384	20.2135	32.0686	25.9472	35.0553	23.0508	31.4161	181.605	195.95	8.64157	12.7367	28.8503	142.682	4897.47	5262.13	4401.89	4694.85	411.196	627.469
[truncated: 26 more columns]

## Sheet: MSM_Norwegian_CD4proxy
year	N_HIV_D	N_HIV_Obs_M	N_CD4_1_D	N_CD4_2_D	N_CD4_3_D	N_CD4_4_D	N_CD4_1_Obs_M	N_CD4_2_Obs_M	N_CD4_3_Obs_M	N_CD4_4_Obs_M	N_AIDS_D	N_AIDS_M	N_HIVAIDS_D	N_HIVAIDS_Obs_M	N_Inf_M	t_diag	t_diag_p50	t_diag_p25	t_diag_p75	D_Avg_Time	N_Alive	N_Alive_Diag_M	N_Und	N_Und_Alive_p	N_Und_CD4_3_M	N_Und_CD4_4_M	N_Und_CD4_3p4_M	N_HIV_Obs_M_LB	N_HIV_Obs_M_UB	N_CD4_1_Obs_M_LB	N_CD4_1_Obs_M_UB	N_CD4_2_Obs_M_LB	N_CD4_2_Obs_M_UB	N_CD4_3_Obs_M_LB	N_CD4_3_Obs_M_UB	N_CD4_4_Obs_M_LB	N_CD4_4_Obs_M_UB	N_AIDS_M_LB	N_AIDS_M_UB	N_HIVAIDS_Obs_M_LB	N_HIVAIDS_Obs_M_UB	N_Inf_M_LB	N_Inf_M_UB	N_Alive_LB	N_Alive_UB	N_Alive_Diag_M_LB	N_Alive_Diag_M_UB	N_Und_LB	N_Und_UB
1980	0	0.036038	0	0	0	0	0	0	0	0	0	0.036038	0	0.036038	16.352	11.5671	10.8755	6.3895	17.2385	0.5	16.3504	0.036038	16.3144	99.7796	1.78109	0.410377	2.19146	0.025774	0.045973	0	0	0	0	0	0	0	0	0.025774	0.045973	0.025774	0.045973	11.8043	20.7806	11.8031	20.7786	0.025774	0.045973	11.7774	20.7326
1981	0	0.447872	0	0	0	0	0	0	0	0	0	0.447872	0	0.447872	42.2643	11.5671	10.8755	6.3895	17.2385	1.1556	58.595	0.483909	58.1111	99.1741	8.48953	2.3181	10.8076	0.32549	0.567586	0	0	0	0	0	0	0	0	0.32549	0.567586	0.32549	0.567586	31.7323	52.9678	43.4724	73.7214	0.351264	0.613559	43.1219	73.1078
1982	0	1.5637	0	0	0	0	0	0	0	0	0	1.5637	0	1.5637	59.0478	11.5671	10.8755	6.3895	17.2385	1.6712	117.574	2.04761	115.526	98.2584	19.469	6.08738	25.5563	1.16257	1.96601	0	0	0	0	0	0	0	0	1.16257	1.96601	1.16257	1.96601	46.7105	72.1876	90.1316	145.964	1.51301	2.57957	88.6186	143.378
1983	0	3.46081	0	0	0	0	0	0	0	0	2	3.46081	0	3.46081	68.114	11.5671	10.8755	6.3895	17.2385	2.18848	183.535	3.50842	180.027	98.0884	33.4738	11.6973	45.1711	2.64088	4.30586	0	0	0	0	0	0	0	0	2.64088	4.30586	2.64088	4.30586	56.8253	80.7756	145.109	224.55	2.15389	4.89176	142.955	219.658
1984	11	46.3095	0	0	0	0	0	0	0	0	4	6.3521	3	4.86512	70.8742	3.87689	2.9965	1.4375	5.4665	2.36387	254.195	49.8179	204.377	80.4017	40.939	12.0834	53.0224	21.4997	74.5777	0	0	0	0	0	0	0	0	4.95112	7.85245	3.8618	5.7333	60.5578	81.0211	208.223	305.318	23.7458	79.4695	167.561	239.584
1985	92	51.5122	0	0	0	0	0	0	0	0	10	9.6929	11	5.24541	68.74	3.87689	2.9965	1.4375	5.4665	2.70908	315.704	94.3301	221.374	70.1207	46.793	13.3445	60.1375	26.2494	75.5991	0	0	0	0	0	0	0	0	7.76523	11.8094	4.23065	6.37335	60.9275	78.0445	264.774	372.427	43.6101	148.069	179.817	265.394
1986	62	55.3656	0	0	0	0	0	0	0	0	15	13.3987	7	5.77228	63.1228	3.87689	2.9965	1.4375	5.4665	3.03485	367.572	138.696	228.876	62.2671	50.5969	14.5124	65.1093	30.5618	74.7483	0	0	0	0	0	0	0	0	11.0415	16.0246	4.15605	7.35924	55.1006	70.8424	306.79	424.007	63.172	211.817	176.795	279.413
1987	61	43.4852	0	0	0	0	0	0	0	0	27	17.1882	7	6.36849	55.434	4.95305	3.9285	1.8875	7.0545	3.41162	408.725	168.181	240.544	58.8523	55.679	16.2616	71.9406	34.08	53.2065	0	0	0	0	0	0	0	0	14.4271	20.1161	4.53245	8.18702	46.2284	63.2111	348.689	470.395	96.3505	242.314	203.826	290.077
1988	39	45.83	0	0	0	0	0	0	0	0	16	20.8786	6	6.99625	46.9959	4.95305	3.9285	1.8875	7.0545	3.78336	441.413	200.011	241.402	54.6885	58.39	17.4301	75.8201	38.2228	53.3022	0	0	0	0	0	0	0	0	17.5646	23.9262	5.49575	8.90668	38.3706	55.6518	384.291	507.813	134.028	274.731	208.652	282.08
1989	40	46.2999	0	0	0	0	0	0	0	0	26	24.2495	5	7.37147	38.5679	4.95305	3.9285	1.8875	7.0545	4.18527	462.656	229.311	233.345	50.436	58.8523	17.9599	76.8122	41.5008	52.248	0	0	0	0	0	0	0	0	20.8388	27.6345	6.08489	9.09724	29.6273	46.6632	402.41	533.284	169.323	303.784	206.449	275.381
1990	31	45.1414	0	0	0	0	0	0	0	0	27	27.1369	4	7.4829	30.545	4.95305	3.9285	1.8875	7.0545	4.61424	470.871	252.452	218.419	46.3861	57.3398	17.8763	75.2161	41.2191	50.3847	0	0	0	0	0	0	0	0	23.7828	30.8312	6.24422	9.03269	22.1369	38.5775	410.01	541.153	195.602	326.886	190.767	259.653
1991	52	42.6739	0	0	0	0	0	0	0	0	29	29.4296	12	7.35116	23.3048	4.95305	3.9285	1.8875	7.0545	5.07137	472.851	274.126	198.725	42.027	54.2261	17.2566	71.4827	38.6015	47.9888	0	0	0	0	0	0	0	0	26.1662	33.4746	6.1002	8.98397	16.0603	29.6846	409.925	543.26	216.456	349.349	166.841	238.936
1992	24	39.2564	0	0	0	0	0	0	0	0	23	31.0666	4	7.01478	17.2249	4.95305	3.9285	1.8875	7.0545	5.55877	460.767	284.382	176.385	38.2807	49.9502	16.2119	66.1621	35.1151	44.3673	0	0	0	0	0	0	0	0	27.5603	34.9815	5.92251	8.75603	11.5586	22.4564	395.883	530.333	226.709	359.514	146.735	212.969
1993	35	35.2712	0	0	0	0	0	0	0	0	37	32.0372	9	6.52411	12.6828	4.95305	3.9285	1.8875	7.0545	6.07514	441.162	287.654	153.509	34.7964	44.9921	14.8751	59.8672	31.2851	39.9792	0	0	0	0	0	0	0	0	28.5945	35.8929	5.42317	8.19505	7.36638	17.5717	376.059	514.161	230.222	362.016	127.461	184.305
1994	31	31.1131	0	0	0	0	0	0	0	0	33	32.3787	6	5.93718	10.0561	4.95305	3.9285	1.8875	7.0545	6.6075	422.956	290.767	132.19	31.2538	39.8546	13.393	53.2476	27.4263	35.0509	0	0	0	0	0	0	0	0	28.8283	36.0802	4.86921	7.41122	4.38904	15.9608	359.093	501.896	233.898	363.935	108.336	155.88
1995	35	27.1825	0	0	0	0	0	0	0	0	35	32.1726	6	5.31657	9.72125	4.95305	3.9285	1.8875	7.0545	7.11599	406.443	291.949	114.494	28.1698	35.052	11.9202	46.9722	23.7328	30.7404	0	0	0	0	0	0	0	0	28.6328	35.8699	4.29803	6.64243	3.07209	15.4212	344.815	487.077	235.552	365.955	90.4869	135.886
1996	27	24.5114	0	0	0	0	0	0	0	0	25	31.5433	6	4.71771	11.9042	4.95305	3.9285	1.8875	7.0545	7.49498	387.139	285.461	101.679	26.2641	30.917	10.5308	41.4478	21.0279	27.6633	0	0	0	0	0	0	0	0	28.1235	35.3496	3.81003	5.93447	5.3478	17.7297	323.889	464.604	229.265	362.594	77.9263	121.909
1997	29	23.0988	0	0	0	0	0	0	0	0	12	30.6439	4	4.16691	16.2541	4.70557	3.7085	1.7775	6.6885	7.60414	395.21	300.559	94.6504	23.9494	27.7585	9.33473	37.0932	18.923	26.4358	0	0	0	0	0	0	0	0	27.4347	34.5768	3.28899	5.28833	9.81583	21.8247	330.236	470.413	244.274	381.398	71.7799	113.547
1998	18	22.6125	0	0	0	0	0	0	0	0	9	29.6361	5	3.7248	22.1807	4.48127	3.5115	1.6815	6.3565	7.32587	408.226	314.172	94.0544	23.0398	25.9057	8.47746	34.3831	18.5139	26.4372	0	0	0	0	0	0	0	0	26.7038	33.3201	2.92301	4.63036	15.9978	26.9143	342.314	482.627	257.643	395.986	74.8966	113.235
1999	26	23.4259	0	0	0	0	0	0	0	0	9	28.6822	4	3.43784	29.0884	4.27717	3.3335	1.5965	6.0545	6.67089	436.163	336.598	99.5653	22.8275	25.4724	8.02633	33.4988	19.7517	27.433	0	0	0	0	0	0	0	0	25.9788	31.9716	2.74341	4.17674	23.5236	33.1887	370.185	511.519	279.879	416.812	81.3579	117.779
2000	25	25.6952	0	0	0	0	0	0	0	0	7	27.9279	3	3.322	36.3816	4.09076	3.1735	1.5205	5.7785	5.82359	468.398	358.293	110.105	23.5068	26.3701	7.98051	34.3506	21.4938	29.5498	0	0	0	0	0	0	0	0	25.3855	30.9766	2.73615	3.96095	30.8745	40.9795	403.03	546.517	301.64	437.335	92.114	125.779
2001	29	29.3572	0	0	0	0	0	0	0	0	6	27.4902	4	3.36641	43.4649	3.91992	3.0285	1.4525	5.5265	5.0152	507.715	383.65	124.065	24.4359	28.3423	8.28287	36.6252	24.9864	32.9886	0	0	0	0	0	0	0	0	24.9629	30.4259	2.80848	3.94785	37.8899	49.2227	440.51	590.203	324.904	462.289	108.966	139.863
2002	21	34.1461	0	0	0	0	0	0	0	0	5	27.4504	1	3.53956	49.7426	3.76285	2.8965	1.3915	5.2945	4.38352	554.301	414.796	139.505	25.1677	31.0111	8.83442	39.8455	30.2256	37.3386	0	0	0	0	0	0	0	0	24.749	30.1963	2.90509	4.17512	43.9319	56.5077	483.617	642.314	352.422	494.028	123.813	160.306
2003	42	39.6227	0	0	0	0	0	0	0	0	7	27.8476	1	3.79528	54.6238	3.61801	2.7765	1.3355	5.0815	3.95513	607.758	453.419	154.339	25.3948	33.9246	9.50976	43.4343	35.9024	43.4213	0	0	0	0	0	0	0	0	24.9863	30.3488	3.08116	4.52109	48.6458	61.8413	532.307	699.801	387.435	534.301	136.159	179.171
2004	52	45.2205	10	5	7	3	8.75497	4.88381	4.27946	3.50968	9	28.6748	4	4.07892	57.7236	3.48407	2.6655	1.2855	4.8845	3.69834	664.302	497.639	166.662	25.0883	36.6207	10.1757	46.7965	41.6149	49.6919	6.02272	11.6106	3.29035	6.4508	3.06189	5.8835	2.48951	4.74032	25.7048	31.1715	3.28227	4.97985	52.2369	65.3171	584.915	758.638	428.402	580.034	145.756	194.272
2005	44	50.3673	14	5	4	3	11.4343	6.40357	5.55861	4.43523	9	29.8838	1	4.33787	59.1538	3.35989	2.5645	1.2385	4.7025	3.56559	722.264	547.007	175.257	24.265	38.7329	10.7193	49.4522	46.3778	55.3662	8.521	15.6176	4.51121	8.31053	4.1643	7.03295	3.2386	5.94205	27.0636	32.6539	3.4594	5.39942	54.1453	65.7295	640.001	817.956	475.165	630.199	152.722	203.159
2006	73	54.6176	15	9	8	5	11.7338	6.6008	5.71626	4.45982	9	31.397	8	4.5313	59.1558	3.24448	2.4715	1.1965	4.5335	3.51351	780.22	600.624	179.596	23.0186	40.0349	11.064	51.0989	50.6127	60.0046	8.50094	15.4665	4.46908	8.50463	3.9229	7.6018	3.02576	5.88137	28.482	34.2434	3.57785	5.71223	54.661	65.342	696.286	876.077	527.044	684.492	156.773	205.243
2007	59	57.686	20	8	9	7	16.5637	9.35606	8.11594	6.2108	3	33.1186	1	4.63387	57.9719	3.13695	2.3845	1.1575	4.3755	3.50995	837.988	658.31	179.677	21.4415	40.4321	11.171	51.6031	53.6706	63.5187	13.1346	20.3817	7.52779	11.8923	6.64958	10.0041	4.4923	7.51251	30.2137	36.0157	3.61908	5.81558	53.6831	62.9452	753.652	932.729	583.982	744.832	157.769	205.144
2008	71	59.4388	16	9	13	6	14.3745	8.14595	7.09282	5.33369	6	34.945	2	4.63566	55.8446	3.03657	2.3045	1.1215	4.2295	3.53302	892.628	716.749	175.879	19.7035	39.9382	11.035	50.9732	55.561	65.1073	10.0186	18.4462	6.15302	10.4788	5.19109	9.32013	3.75103	6.95727	32.2006	37.9028	3.61976	5.80222	50.5306	61.1252	809.147	990.383	642.688	805.542	151.349	199.867
2009	60	59.8729	21	14	6	10	21.0955	11.9814	10.4803	7.75239	6	36.7732	5	4.53899	53.0162	2.94265	2.2305	1.0885	4.0925	3.56835	945.444	776.622	168.822	17.8564	38.6469	10.6761	49.323	56.0449	65.2956	18.3388	24.8584	9.78793	14.7648	8.8537	12.7015	6.06956	9.08008	34.1934	39.7324	3.50768	5.75559	46.8718	58.4886	863.978	1049.33	703.782	867.193	144.816	193.768
2010	53	59.0905	14	12	12	11	21.6228	12.2953	10.8042	7.86597	6	38.5083	2	4.3558	49.7289	2.85461	2.1605	1.0575	3.9645	3.60636	993.981	834.712	159.268	16.0233	36.7047	10.1322	46.8368	54.3342	64.5209	18.6912	24.7521	9.93391	15.1042	9.15581	12.973	6.32641	9.4371	35.7966	41.4905	3.28672	5.63785	42.1598	55.4272	914.615	1094.94	757.575	930.72	134.805	184.367
2011	67	57.2729	25	15	12	9	20.8542	11.8597	10.4635	7.49955	8	40.0685	3	4.10357	46.219	2.77194	2.0965	1.0285	3.8435	3.64049	1038.02	889.985	148.033	14.2611	34.2866	9.45083	43.7374	51.6236	62.6224	17.4209	23.5927	9.42891	14.2335	8.87696	12.6286	5.83497	9.08272	37.4385	43.3136	3.0536	5.42245	37.433	52.2978	955.898	1134.11	807.199	984.819	124.321	172.712
2012	47	54.6466	17	5	5	5	16.3582	9.29469	8.22573	5.80417	6	41.389	6	3.80299	42.5965	2.69416	2.0355	1.0015	3.7305	3.66615	1080.45	944.632	135.816	12.5703	31.5648	8.681	40.2458	48.3453	59.8119	13.6422	19.7336	7.53091	10.9656	6.46336	10.0057	4.40814	7.61327	38.6572	44.5045	2.76321	5.17169	33.6751	48.9241	1002.64	1171.44	862.64	1036.99	113.292	159.742
2013	50	51.4098	15	8	12	7	19.3493	10.976	9.73457	6.76238	10	42.4215	7	3.47272	38.7759	2.62087	1.9785	0.9765	3.6245	3.68243	1119.07	996.042	123.029	10.9938	28.6681	7.86201	36.5301	44.6835	56.7765	15.0335	22.2388	8.39454	12.9663	8.23522	11.8643	5.09579	8.37046	39.6079	45.428	2.48624	4.80079	30.9777	44.5753	1042.06	1205.4	916.936	1087.76	101.436	146.06
2014	50	47.6833	15	12	8	5	18.0135	10.1973	9.06038	6.19834	7	43.1302	9	3.12703	34.641	2.5517	1.9255	0.9525	3.5245	3.69306	1152.57	1042.72	109.848	9.53071	25.6744	7.02008	32.6944	40.7513	53.153	14.7763	20.7067	7.80339	11.9083	7.61256	11.1223	4.69392	7.58465	40.2865	46.148	2.18708	4.46259	27.4468	39.4728	1075.09	1238.64	967.109	1133.2	89.4795	131.978
2015	36	43.5143	15	9	6	3	16.9212	9.56036	8.51618	5.74196	1	43.4887	3	2.77464	30.0754	2.48632	1.8755	0.9305	3.4305	3.70575	1182.53	1086.24	96.2871	8.14249	22.6191	6.16935	28.7884	36.6461	48.6294	13.29	19.4708	7.65787	11.1553	7.18401	10.4822	4.22946	6.97837	40.5015	46.7083	1.90153	4.02907	24.8371	35.7779	1103.06	1273.01	1011.63	1174.87	77.242	115.164
2016	44	38.8923	14	14	9	4	14.8009	8.35179	7.4762	4.97538	1	43.4758	2	2.41958	24.9628	2.42443	1.8285	0.9095	3.3415	3.73249	1207.38	1125.13	82.2509	6.81233	19.5063	5.31448	24.8208	32.2925	43.0384	12.0746	17.3662	6.5296	9.67064	6.25708	9.06724	3.65665	5.97325	40.4934	46.8503	1.63207	3.61637	19.0891	31.6891	1125.74	1301.38	1049.53	1211.32	63.4481	100.895
2017	34	33.7637	16	5	6	6	12.7643	7.204	6.51202	4.28832	1	43.0731	0	2.06268	19.1869	2.36577	1.7835	0.8895	3.2565	3.79218	1226.48	1158.9	67.5832	5.51034	16.319	4.45342	20.7724	27.9667	39.24	10.4084	15.1015	5.26674	8.77775	5.42059	7.83535	3.07141	5.29599	39.7523	46.5249	1.36276	3.15835	12.5976	30.1412	1144.98	1324.4	1080.1	1246.86	48.1163	90.1796
2018	27	28.0448	11	5	3	3	9.54273	5.40245	4.97829	3.25807	3	42.2625	2	1.70219	12.6315	2.3101	1.7415	0.8715	3.1765	3.91943	1239.03	1186.94	52.0948	4.20446	13.027	3.57993	16.6069	21.9328	35.478	7.09324	12.3185	3.93595	6.94397	3.72679	6.15025	2.14627	4.15568	38.8413	45.4425	1.05666	2.71645	4.58106	28.0105	1150.82	1350.55	1107.28	1275.91	32.9824	82.4862
[truncated: 26 more columns]

## Sheet: MSM_mig_CD4proxy
year	N_HIV_D	N_HIV_Obs_M	N_CD4_1_D	N_CD4_2_D	N_CD4_3_D	N_CD4_4_D	N_CD4_1_Obs_M	N_CD4_2_Obs_M	N_CD4_3_Obs_M	N_CD4_4_Obs_M	N_AIDS_D	N_AIDS_M	N_HIVAIDS_D	N_HIVAIDS_Obs_M	N_Inf_M	t_diag	t_diag_p50	t_diag_p25	t_diag_p75	D_Avg_Time	N_Alive	N_Alive_Diag_M	N_Und	N_Und_Alive_p	N_Und_CD4_3_M	N_Und_CD4_4_M	N_Und_CD4_3p4_M	N_HIV_Obs_M_LB	N_HIV_Obs_M_UB	N_CD4_1_Obs_M_LB	N_CD4_1_Obs_M_UB	N_CD4_2_Obs_M_LB	N_CD4_2_Obs_M_UB	N_CD4_3_Obs_M_LB	N_CD4_3_Obs_M_UB	N_CD4_4_Obs_M_LB	N_CD4_4_Obs_M_UB	N_AIDS_M_LB	N_AIDS_M_UB	N_HIVAIDS_Obs_M_LB	N_HIVAIDS_Obs_M_UB	N_Inf_M_LB	N_Inf_M_UB	N_Alive_LB	N_Alive_UB	N_Alive_Diag_M_LB	N_Alive_Diag_M_UB	N_Und_LB	N_Und_UB
1980	0	0.002446	0	0	0	0	0	0	0	0	0	0.002446	0	0.002446	1.10245	11.5671	10.8755	6.3895	17.2385	0.5	1.10234	0.002446	1.09989	99.7781	0.120392	0.027755	0.148147	0.000125	0.004591	0	0	0	0	0	0	0	0	0.000125	0.004591	0.000125	0.004591	0.096913	2.05501	0.096908	2.05481	0.000125	0.004591	0.096783	2.05022
1981	0	0.030052	0	0	0	0	0	0	0	0	0	0.030052	0	0.030052	2.78274	11.5671	10.8755	6.3895	17.2385	1.15956	3.88376	0.032498	3.85126	99.1632	0.564985	0.154594	0.719579	0.003459	0.05573	0	0	0	0	0	0	0	0	0.003459	0.05573	0.003459	0.05573	0.627847	5.05185	0.724602	7.10421	0.003583	0.060321	0.721019	7.04389
1982	0	0.103544	0	0	0	0	0	0	0	0	0	0.103544	0	0.103544	3.78019	11.5671	10.8755	6.3895	17.2385	1.68104	7.65938	0.136042	7.52334	98.2239	1.27509	0.400302	1.67539	0.020035	0.189134	0	0	0	0	0	0	0	0	0.020035	0.189134	0.020035	0.189134	1.38662	6.60781	2.27443	13.7037	0.023618	0.249456	2.25081	13.4542
1983	0	0.226071	0	0	0	0	0	0	0	0	0	0.226071	0	0.226071	4.23353	11.5671	10.8755	6.3895	17.2385	2.2075	11.8829	0.362113	11.5208	96.9527	2.15764	0.758624	2.91627	0.063557	0.405722	0	0	0	0	0	0	0	0	0.063557	0.405722	0.063557	0.405722	2.40276	7.09592	4.47295	20.7139	0.087175	0.655178	4.39526	20.0587
1984	1	0.004287	0	0	0	0	0	0	0	0	0	0.401092	0	0.349845	4.28151	18.0514	0.0005	0.0005	0.0005	67.1773	16.149	0.3664	15.7826	97.7311	3.27344	0.982027	4.25546	0	8.77765	0	0	0	0	0	0	0	0	0.140407	0.717369	0.120586	0.579126	3.02777	6.74305	8.0795	27.3319	0.20745	9.24807	6.05884	24.125
1985	9	0.000242	0	0	0	0	0	0	0	0	0	0.602066	0	0.463769	4.06286	18.0514	0.0005	0.0005	0.0005	1710.41	19.1914	-0.633359	19.8248	103.3	4.45824	1.30845	5.76668	0	6.68726	0	0	0	0	0	0	0	0	0.271702	1.05561	0.127327	0.706766	2.97469	6.26037	11.0972	32.4124	-0.79255	14.9353	7.21346	28.2721
1986	4	0.074377	0	0	0	0	0	0	0	0	0	0.820985	0	0.60972	3.71633	18.0514	0.0005	0.0005	0.0005	11.4232	21.8809	-1.55898	23.4399	107.125	5.64431	1.68466	7.32897	0.042239	6.00616	0	0	0	0	0	0	0	0	0.452954	1.40832	0.145762	0.872214	2.36982	6.12876	14.1245	35.4606	-1.75031	19.432	7.48839	30.2838
1987	8	5.59782	0	0	0	0	0	0	0	0	0	1.06251	0	0.691579	3.38066	4.0215	3.1185	1.4945	5.6795	3.92509	24.2311	3.03884	21.1922	87.4589	5.3332	1.62723	6.96042	2.0732	8.53845	0	0	0	0	0	0	0	0	0.648278	1.75676	0.170248	0.944005	1.87627	6.47571	16.3198	38.1805	0.989711	20.2553	7.94816	27.1029
1988	4	5.13042	0	0	0	0	0	0	0	0	1	1.29081	0	0.663126	3.1809	4.0215	3.1185	1.4945	5.6795	4.38833	26.3827	7.16926	19.2135	72.8259	4.96585	1.54095	6.5068	2.65313	7.46743	0	0	0	0	0	0	0	0	0.869969	2.03488	0.191465	0.903693	1.21992	6.65199	17.6428	41.9483	3.49318	23.7236	7.93512	24.6685
1989	6	4.70485	0	0	0	0	0	0	0	0	6	1.50488	1	0.62488	3.15571	4.0215	3.1185	1.4945	5.6795	4.75464	27.5109	9.87411	17.6368	64.1083	4.60767	1.4447	6.05237	2.58417	6.54409	0	0	0	0	0	0	0	0	1.07385	2.28741	0.201513	0.840788	0.86206	6.51108	20.2623	44.4136	5.18058	27.0194	8.18541	23.2403
1990	3	4.35801	0	0	0	0	0	0	0	0	4	1.70365	1	0.585425	3.28783	4.0215	3.1185	1.4945	5.6795	5.00089	26.7729	10.2321	16.5408	61.7818	4.30559	1.35461	5.6602	2.64682	5.81769	0	0	0	0	0	0	0	0	1.20812	2.584	0.210871	0.818511	0.948518	6.40926	19.3015	44.6834	4.90568	28.0695	7.826	23.6772
1991	5	4.11339	0	0	0	0	0	0	0	0	3	1.88842	2	0.550755	3.55734	4.0215	3.1185	1.4945	5.6795	5.11012	26.306	10.3455	15.9604	60.6724	4.08976	1.28255	5.3723	2.71112	5.5703	0	0	0	0	0	0	0	0	1.50204	2.84146	0.208954	0.785391	1.2435	6.04468	19.0103	44.8728	4.35146	28.1931	8.26136	23.0898
1992	3	3.98352	0	0	0	0	0	0	0	0	0	2.06311	0	0.525064	3.94429	4.0215	3.1185	1.4945	5.6795	5.08247	28.2271	12.329	15.8981	56.322	3.97702	1.23625	5.21327	2.57936	5.52663	0	0	0	0	0	0	0	0	1.65821	3.06791	0.202931	0.738524	1.58441	5.84532	19.9124	47.0843	5.23996	30.1844	8.01127	22.4345
1993	6	3.97223	0	0	0	0	0	0	0	0	0	2.2334	0	0.51095	4.42873	4.0215	3.1185	1.4945	5.6795	4.94117	31.6333	15.3013	16.332	51.6292	3.97416	1.21997	5.19413	2.42128	5.46091	0	0	0	0	0	0	0	0	1.83269	3.26326	0.216759	0.737403	1.98119	6.46288	20.8615	50.4075	7.2044	33.3682	7.71916	23.1133
1994	4	4.0768	0	0	0	0	0	0	0	0	1	2.40587	1	0.509685	4.99073	4.0215	3.1185	1.4945	5.6795	4.72814	33.6015	16.3781	17.2235	51.258	4.08046	1.23527	5.31573	2.34911	5.4264	0	0	0	0	0	0	0	0	1.94058	3.4322	0.191599	0.744501	2.52714	7.50342	20.4376	51.9199	7.36514	34.7409	8.2957	24.6413
1995	5	4.28961	0	0	0	0	0	0	0	0	0	2.58734	0	0.521532	5.61041	4.0215	3.1185	1.4945	5.6795	4.4905	38.189	19.6677	18.5213	48.4991	4.28978	1.2816	5.57138	2.37508	5.64162	0	0	0	0	0	0	0	0	1.97068	3.5842	0.217762	0.789202	3.13327	8.05128	23.5255	57.4453	10.4711	39.0761	9.25341	27.5299
1996	5	4.65788	0	0	0	0	0	0	0	0	0	2.78436	0	0.545541	6.27764	4.0215	3.1185	1.4945	5.6795	4.26079	43.4426	23.3256	20.117	46.3071	4.57522	1.35288	5.9281	2.75445	6.10279	0	0	0	0	0	0	0	0	2.0592	3.80941	0.257343	0.86403	3.90934	9.10514	28.0369	61.7554	14.5527	43.5803	10.8952	30.949
1997	1	5.16647	0	0	0	0	0	0	0	0	0	3.00298	1	0.578425	7.01962	3.93761	3.0465	1.4615	5.5535	4.0629	49.4367	27.492	21.9446	44.3894	4.91127	1.442	6.35326	3.14631	6.96232	0	0	0	0	0	0	0	0	2.18757	4.01997	0.278141	0.911038	4.84492	9.57685	33.245	67.6808	17.303	48.4173	12.1923	32.5423
1998	8	5.75655	0	0	0	0	0	0	0	0	4	3.24895	2	0.618425	7.87902	3.8578	2.9775	1.4305	5.4325	3.89666	56.2884	32.2486	24.0398	42.7083	5.29842	1.5476	6.84602	3.9171	7.56324	0	0	0	0	0	0	0	0	2.36416	4.26721	0.308165	0.945744	5.65542	10.228	39.2668	75.8447	20.0823	53.7941	14.1275	33.9801
1999	8	6.44124	0	0	0	0	0	0	0	0	3	3.52862	2	0.6654	8.89889	3.78176	2.9125	1.4005	5.3185	3.75527	64.158	37.6898	26.4682	41.2547	5.74508	1.67075	7.41583	4.82245	8.7003	0	0	0	0	0	0	0	0	2.60786	4.55077	0.344155	0.969803	6.71911	11.2638	46.2783	84.1891	24.6596	59.1643	16.8738	36.3644
2000	7	7.24234	0	0	0	0	0	0	0	0	0	3.8494	0	0.720162	10.1222	3.70924	2.8505	1.3725	5.2095	3.6314	74.2485	44.9322	29.3163	39.4841	6.26527	1.81449	8.07976	5.62003	9.50901	0	0	0	0	0	0	0	0	2.9292	4.86303	0.393131	1.02108	7.69063	12.9719	55.5141	95.8055	31.067	67.9308	19.81	38.1735
2001	7	8.18889	0	0	0	0	0	0	0	0	3	4.22013	0	0.784243	11.5921	3.63998	2.7925	1.3455	5.1055	3.51965	85.806	53.121	32.685	38.0917	6.87672	1.9833	8.86002	6.71114	10.4962	0	0	0	0	0	0	0	0	3.25101	5.22418	0.457214	1.09676	8.69347	14.31	64.8154	110.151	38.4115	76.178	21.8831	42.5632
2002	7	9.31571	0	0	0	0	0	0	0	0	1	4.65144	1	0.859681	13.3515	3.57376	2.7365	1.3195	5.0065	3.41711	99.1196	62.4368	36.6829	37.0087	7.59935	2.18254	9.78189	7.75952	11.7455	0	0	0	0	0	0	0	0	3.62228	5.83989	0.508513	1.19947	9.87516	16.12	77.1967	125.171	46.8937	84.3563	24.4101	47.6397
2003	15	10.662	0	0	0	0	0	0	0	0	5	5.15595	2	0.948809	15.4425	3.51039	2.6825	1.2955	4.9115	3.32287	114.52	73.0988	41.4215	36.1696	8.4539	2.41807	10.872	8.82913	13.1533	0	0	0	0	0	0	0	0	4.14541	6.52748	0.559401	1.2914	11.6281	18.4869	92.7118	141.53	56.7658	96.232	28.1392	53.4496
2004	19	12.268	4	1	0	5	2.30035	1.48187	1.24771	0.872176	1	5.74837	0	1.05401	17.8595	3.44968	2.6315	1.2715	4.8215	3.23767	132.333	85.3668	46.9665	35.4911	9.45634	2.69489	12.1512	10.079	14.8033	1.11778	3.91401	0.63673	2.44216	0.461357	2.11689	0.309487	1.48241	4.7824	7.0472	0.627394	1.45776	14.0991	20.9837	108.1	161.473	68.3333	110.87	33.1921	60.0948
2005	11	14.1553	3	2	2	0	3.54756	2.3161	1.91414	1.30725	2	6.44419	1	1.17663	20.483	3.39146	2.5835	1.2495	4.7345	3.16544	150.764	97.5221	53.2424	35.315	10.6011	3.01309	13.6142	11.9566	16.9433	1.96867	5.11187	1.3217	3.50749	1.05887	2.55896	0.6888	1.76344	5.34005	7.75105	0.730952	1.61187	16.7275	23.8799	127.451	181.994	79.9322	125.448	39.6973	67.5307
2006	12	16.3058	3	2	1	1	3.41715	2.25988	1.83824	1.22904	2	7.25691	0	1.31552	23.1635	3.33558	2.5365	1.2285	4.6515	3.11149	173.87	113.828	60.0421	34.5328	11.8564	3.36592	15.2223	14.1581	19.0316	1.72439	4.99056	1.04524	3.56584	0.910031	2.87916	0.553333	2.0655	6.19732	8.65669	0.829099	1.70759	19.8488	27.2835	151.988	206.751	96.0063	144.06	47.2207	74.6448
2007	18	18.6627	6	0	3	1	3.73172	2.49877	2.00647	1.31635	0	8.19555	0	1.46673	25.7512	3.28188	2.4915	1.2085	4.5715	3.07858	199.556	132.491	67.0659	33.6075	13.1694	3.74035	16.9097	15.9984	21.552	2.08686	5.63381	1.46818	3.92848	1.14608	3.28545	0.654047	2.06554	7.20651	9.67148	0.940395	1.82811	22.106	30.3845	177.345	233.764	114.445	164.284	54.9619	82.465
2008	18	21.1374	2	3	5	2	5.70862	3.86799	3.07471	1.98377	0	9.26271	2	1.62393	28.0965	3.23026	2.4495	1.1885	4.4945	3.06644	227.581	153.628	73.9534	32.4954	14.4724	4.11846	18.5908	18.8397	24.3103	3.80867	7.64835	2.65423	5.36894	2.08527	4.34472	1.25022	2.68515	8.16602	10.7913	1.05944	2.06986	24.2444	32.9726	204.916	263.47	135.784	185.366	59.7936	90.1135
2009	27	23.6163	5	7	5	5	7.19206	4.92739	3.88696	2.47127	1	10.4531	1	1.77904	30.0496	3.18057	2.4085	1.1695	4.4215	3.07301	257.553	177.244	80.3083	31.1813	15.6888	4.47905	20.1679	20.6394	26.9128	5.29827	9.33881	3.68091	6.46574	3.01226	4.96343	1.64425	3.15362	9.15277	12.0065	1.1877	2.29737	25.7408	34.8838	233.915	294.387	157.444	208.657	65.4389	95.5041
2010	27	25.9673	7	6	5	2	7.77895	5.38406	4.22339	2.65065	4	11.7523	3	1.92286	31.461	3.13272	2.3685	1.1515	4.3505	3.09583	287.929	202.212	85.7172	29.7703	16.7383	4.79914	21.5374	22.2227	29.1798	6.12411	9.9175	4.16519	7.13207	2.96557	5.60102	1.71096	3.44012	10.5969	13.3269	1.2807	2.42564	26.9447	36.3982	262.327	324.853	178.137	236.103	70.7087	99.4205
2011	23	28.0451	9	6	4	4	10.0653	7.03113	5.49396	3.40895	1	13.1365	0	2.0457	32.1838	3.08659	2.3305	1.1345	4.2825	3.13299	319.022	229.257	89.7657	28.1378	17.5403	5.05526	22.5956	24.0022	31.6068	8.22963	12.2133	5.7404	8.72204	4.20986	7.12217	2.37363	4.30821	11.8966	14.7698	1.35455	2.60164	27.7488	37.3803	290.699	357.372	203.91	264.595	74.0801	104.925
2012	22	29.6994	4	5.58824	3	0	7.04867	4.96452	3.86996	2.37732	4	14.5716	3	2.13799	32.1305	3.0421	2.2945	1.1185	4.2165	3.18345	350.058	257.956	92.1026	26.3106	18.0234	5.2257	23.2491	25.5997	33.6913	4.66359	9.58088	3.35073	6.51315	2.59317	5.2735	1.53373	3.20301	13.1257	16.5009	1.40312	2.81659	28.1378	37.1097	317.759	392.694	232.414	294.726	74.328	109.436
2013	39	30.8003	12	15	5	1	10.382	7.36492	5.73494	3.49211	5	16.0156	4	2.19154	31.3055	2.99914	2.2595	1.1025	4.1535	3.24609	380.267	287.756	92.5112	24.3279	18.1395	5.2944	23.4339	27.1169	34.9296	8.31043	12.5348	5.979	9.13718	4.23254	7.41672	2.47574	4.64633	14.3722	18.1929	1.41992	3.04226	27.5148	36.095	346.317	426.347	262.263	325.302	72.7088	109.402
2014	40	31.2547	18	8	8	3	10.5797	7.55117	5.88002	3.55288	1	17.4205	1	2.20095	29.7279	2.95765	2.2255	1.0865	4.0915	3.32002	407.898	317.011	90.8874	22.2819	17.865	5.25201	23.117	27.4185	35.1662	8.58791	12.7591	5.94039	9.39649	4.27441	7.46492	2.37078	4.88643	15.6336	19.5849	1.4024	3.07478	25.1793	34.7247	372.808	456.279	289.016	354.228	69.6016	108.577
2015	21	31.0018	7	7	2	4	11.0403	7.91959	6.17339	3.7053	0	18.7352	1	2.16326	27.4165	2.91755	2.1925	1.0715	4.0325	3.40577	435.219	348.013	87.2067	20.0374	17.1954	5.09507	22.2905	26.9811	34.1489	9.02885	13.3317	6.41454	10.2154	4.70121	7.66437	2.60167	4.87599	17.0414	20.9126	1.34402	3.17594	21.3772	34.2994	399.903	483.623	320.115	386.402	65.0756	109.191
2016	32	30.0066	12	4	7	5	9.95411	7.16851	5.60079	3.34327	1	19.9073	2	2.07798	24.3902	2.87876	2.1615	1.0575	3.9755	3.50622	459.518	378.019	81.4987	17.7357	16.1401	4.82473	20.9648	25.68	33.4644	7.76304	12.4008	5.65502	9.14933	3.97388	7.29679	2.25948	4.4246	18.0981	22.1306	1.22307	3.22477	17.1101	34.4384	422.504	507.811	349.931	419.449	59.4772	107.808
2017	28	28.2522	12	6	5	2	9.63371	6.95707	5.45794	3.2455	4	20.8849	2	1.94617	20.6681	2.84121	2.1305	1.0435	3.9205	3.62797	479.1	405.271	73.8288	15.4099	14.7176	4.44543	19.163	23.1404	33.5539	7.50469	11.79	5.06676	9.50861	3.82521	7.46764	2.19218	4.68163	18.9499	23.1193	1.12275	3.20766	11.0348	34.6968	436.431	532.746	375.462	448.44	49.9017	105.457
2018	26	25.7355	5	4	6	4	7.85819	5.68321	4.4899	2.66615	3	21.6179	4	1.77003	16.269	2.80486	2.1015	1.0305	3.8675	3.78404	494.291	430.007	64.2842	13.0053	12.952	3.96375	16.9158	18.7092	34.4497	5.45579	10.9896	3.80771	8.4293	2.99623	6.27566	1.69333	4.06287	19.6215	23.9545	0.943633	3.11828	3.91116	34.7564	445.32	558.481	398.051	473.248	36.0382	103.127
[truncated: 26 more columns]

## Sheet: Hetero_Norwegian_CD4proxy
year	N_HIV_D	N_HIV_Obs_M	N_CD4_1_D	N_CD4_2_D	N_CD4_3_D	N_CD4_4_D	N_CD4_1_Obs_M	N_CD4_2_Obs_M	N_CD4_3_Obs_M	N_CD4_4_Obs_M	N_AIDS_D	N_AIDS_M	N_HIVAIDS_D	N_HIVAIDS_Obs_M	N_Inf_M	t_diag	t_diag_p50	t_diag_p25	t_diag_p75	D_Avg_Time	N_Alive	N_Alive_Diag_M	N_Und	N_Und_Alive_p	N_Und_CD4_3_M	N_Und_CD4_4_M	N_Und_CD4_3p4_M	N_HIV_Obs_M_LB	N_HIV_Obs_M_UB	N_CD4_1_Obs_M_LB	N_CD4_1_Obs_M_UB	N_CD4_2_Obs_M_LB	N_CD4_2_Obs_M_UB	N_CD4_3_Obs_M_LB	N_CD4_3_Obs_M_UB	N_CD4_4_Obs_M_LB	N_CD4_4_Obs_M_UB	N_AIDS_M_LB	N_AIDS_M_UB	N_HIVAIDS_Obs_M_LB	N_HIVAIDS_Obs_M_UB	N_Inf_M_LB	N_Inf_M_UB	N_Alive_LB	N_Alive_UB	N_Alive_Diag_M_LB	N_Alive_Diag_M_UB	N_Und_LB	N_Und_UB
1980	0	0.006476	0	0	0	0	0	0	0	0	0	0.006476	0	0.006476	2.94515	11.5671	10.8755	6.3895	17.2385	0.5	2.94486	0.006476	2.93838	99.7801	0.320511	0.073835	0.394346	0.002273	0.011799	0	0	0	0	0	0	0	0	0.002273	0.011799	0.002273	0.011799	1.11366	5.30775	1.11356	5.30723	0.002273	0.011799	1.11129	5.29543
1981	0	0.080822	0	0	0	0	0	0	0	0	0	0.080822	0	0.080822	7.68869	11.5671	10.8755	6.3895	17.2385	1.15406	10.63	0.087298	10.5427	99.1788	1.53726	0.419387	1.95665	0.032162	0.144484	0	0	0	0	0	0	0	0	0.032162	0.144484	0.032162	0.144484	3.65995	13.3042	4.7721	18.605	0.034436	0.156284	4.73766	18.4487
1982	0	0.283926	0	0	0	0	0	0	0	0	0	0.283926	0	0.283926	10.9313	11.5671	10.8755	6.3895	17.2385	1.6665	21.5487	0.371224	21.1775	98.2773	3.55655	1.10958	4.66613	0.128876	0.495861	0	0	0	0	0	0	0	0	0.128876	0.495861	0.128876	0.495861	6.54783	18.4156	11.3142	36.6501	0.163312	0.652145	11.1509	36.012
1983	0	0.633677	0	0	0	0	0	0	0	0	0	0.633677	0	0.633677	12.9652	11.5671	10.8755	6.3895	17.2385	2.17712	34.486	1.0049	33.4811	97.0861	6.18892	2.15329	8.34221	0.326061	1.07892	0	0	0	0	0	0	0	0	0.326061	1.07892	0.326061	1.07892	9.36658	20.6946	20.8947	57.9387	0.489373	1.73007	20.4053	56.2217
1984	0	0.023753	0	0	0	0	0	0	0	0	0	1.15233	0	1.00472	14.0825	17.7424	0.0005	0.0005	0.0005	36.294	48.5242	1.02865	47.4955	97.8801	9.67038	2.86504	12.5354	0.015431	13.1441	0	0	0	0	0	0	0	0	0.668745	1.99978	0.562661	1.53059	11.3281	19.7952	33.1039	80.2564	0.608432	14.173	30.809	66.093
1985	6	0.000106	0	0	0	0	0	0	0	0	0	1.77767	1	1.37179	14.5757	17.7424	0.0005	0.0005	0.0005	11692.7	63.0394	1.02876	62.0106	98.3681	13.6019	3.93797	17.5399	0	14.0809	0	0	0	0	0	0	0	0	1.15059	3.04813	0.811892	1.91798	12.5611	19.999	47.2648	97.481	0.608432	28.2539	41.1762	81.21
1986	10	0.200214	0	0	0	0	0	0	0	0	2	2.49857	1	1.86176	14.7368	17.7424	0.0005	0.0005	0.0005	12.6636	76.694	0.228974	76.4651	99.7014	17.8325	5.23926	23.0717	0.127102	15.1317	0	0	0	0	0	0	0	0	1.75884	4.07548	1.0261	2.50945	11.9945	19.958	60.3913	110.7	-0.264466	42.3856	48.6524	95.6959
1987	25	18.6224	0	0	0	0	0	0	0	0	2	3.34387	2	2.18041	14.858	3.961	3.0675	1.4705	5.5905	3.68151	91.4559	18.8514	72.6046	79.3875	17.5011	5.23604	22.7371	12.8256	23.8396	0	0	0	0	0	0	0	0	2.5298	5.13756	1.22599	2.8482	10.8299	20.8286	76.3739	125.577	15.3777	55.3648	50.4867	87.9842
1988	24	17.9049	0	0	0	0	0	0	0	0	2	4.21022	2	2.17023	15.2019	3.961	3.0675	1.4705	5.5905	4.0328	103.562	33.7563	69.8059	67.4048	17.0846	5.17111	22.2557	13.5228	21.3961	0	0	0	0	0	0	0	0	3.34427	6.07615	1.32678	2.75229	10.1702	21.7887	89.3306	141.434	28.5063	70.6524	50.3993	83.4031
1989	17	17.3665	0	0	0	0	0	0	0	0	2	5.09534	2	2.13909	15.8425	3.961	3.0675	1.4705	5.5905	4.27087	117.31	49.1228	68.1875	58.1258	16.728	5.09049	21.8185	13.917	21.2967	0	0	0	0	0	0	0	0	4.26882	6.98656	1.37239	2.63522	10.4165	22.1308	102.377	156.95	42.1622	85.4243	50.3183	83.0793
1990	16	17.0596	0	0	0	0	0	0	0	0	11	5.99165	2	2.10811	16.7321	3.961	3.0675	1.4705	5.5905	4.40306	130.95	63.1824	67.7671	51.7506	16.524	5.02987	21.5538	14.2193	20.4354	0	0	0	0	0	0	0	0	5.17999	8.12565	1.41575	2.71861	11.6735	21.9013	113.382	171.223	54.1209	100.377	48.2236	83.807
1991	17	17.0062	0	0	0	0	0	0	0	0	4	6.8941	2	2.08984	17.8172	3.961	3.0675	1.4705	5.5905	4.44588	145.675	77.1886	68.486	47.013	16.5208	5.01249	21.5333	13.4563	20.0688	0	0	0	0	0	0	0	0	6.07481	9.13677	1.38394	2.6201	13.1115	21.8112	125.408	185.505	65.266	116.479	50.5587	84.1352
1992	19	17.206	0	0	0	0	0	0	0	0	8	7.80243	2	2.09208	19.0442	3.961	3.0675	1.4705	5.5905	4.42267	156.627	86.3946	70.2319	44.8404	16.7345	5.05056	21.7851	13.5428	20.1281	0	0	0	0	0	0	0	0	6.83774	10.0753	1.39554	2.62385	14.7081	22.9027	133.654	195.062	73.0915	127.511	52.6395	85.299
1993	16	17.6413	0	0	0	0	0	0	0	0	7	8.71915	3	2.11829	20.3594	3.961	3.0675	1.4705	5.5905	4.35894	165.893	93.0359	72.8566	43.918	17.1583	5.14779	22.3061	14.0812	21.0576	0	0	0	0	0	0	0	0	7.60863	10.942	1.39751	2.68849	15.8278	23.9947	140.277	202.646	78.9202	135.427	54.5962	87.4158
1994	7	18.2828	0	0	0	0	0	0	0	0	9	9.64822	1	2.16883	21.7094	3.961	3.0675	1.4705	5.5905	4.27773	180.506	104.319	76.1877	42.2078	17.7697	5.30157	23.0713	14.8459	21.5386	0	0	0	0	0	0	0	0	8.39589	11.7449	1.4904	2.74641	16.8794	25.4563	150.664	219.096	87.6203	147.241	56.586	90.3939
1995	17	19.0924	0	0	0	0	0	0	0	0	16	10.5937	1	2.24186	23.0407	3.961	3.0675	1.4705	5.5905	4.19666	195.448	115.411	80.0371	40.9506	18.536	5.50493	24.0409	15.5148	22.1694	0	0	0	0	0	0	0	0	9.20834	12.4979	1.59113	2.84048	18.0612	27.7993	163.068	230.714	95.424	158.407	60.1904	96.5003
1996	23	19.9665	0	0	0	0	0	0	0	0	8	11.5576	3	2.33544	24.3084	3.961	3.0675	1.4705	5.5905	4.12842	215.654	131.378	84.276	39.0793	19.4248	5.76211	25.187	16.3396	22.9296	0	0	0	0	0	0	0	0	9.96796	13.4209	1.65472	2.95435	19.2624	29.214	180.062	248.206	108.013	174.578	63.3545	102.578
1997	28	20.8791	0	0	0	0	0	0	0	0	9	12.5412	3	2.45161	25.5013	3.98071	3.0845	1.4785	5.6195	4.07849	237.047	148.257	88.7902	37.4568	20.4079	6.06712	26.475	16.9974	23.9745	0	0	0	0	0	0	0	0	10.7176	14.254	1.72986	3.06413	20.8496	30.3792	199.288	270.83	123.988	190.675	65.8628	107.381
1998	18	21.8531	0	0	0	0	0	0	0	0	3	13.5442	2	2.58457	26.6222	4.00063	3.1015	1.4875	5.6495	4.04834	258.555	165.11	93.4454	36.1414	21.4548	6.40382	27.8586	17.8319	25.2481	0	0	0	0	0	0	0	0	11.6621	15.1939	1.82948	3.19204	22.3294	31.1536	219.769	295.799	139.543	206.213	70.1178	111.669
1999	21	22.854	0	0	0	0	0	0	0	0	4	14.5642	3	2.72879	27.674	4.02078	3.1195	1.4955	5.6795	4.03606	284.109	185.964	98.1451	34.5449	22.5393	6.76194	29.3013	18.6673	26.6619	0	0	0	0	0	0	0	0	12.5484	16.22	1.95135	3.33102	23.7659	31.6776	242.838	325.394	156.688	226.975	75.901	113.418
2000	32	23.8579	0	0	0	0	0	0	0	0	5	15.5979	3	2.88057	28.6598	4.04113	3.1365	1.5035	5.7105	4.03867	307.642	204.822	102.82	33.422	23.6405	7.13398	30.7745	20.2194	27.8038	0	0	0	0	0	0	0	0	13.4561	17.3497	2.09494	3.49888	23.8953	33.1058	265.977	350.763	171.768	246.313	82.1349	118.797
2001	24	24.8475	0	0	0	0	0	0	0	0	6	16.6412	2	3.03707	29.5825	4.06171	3.1545	1.5125	5.7405	4.05307	331.09	223.669	107.421	32.4447	24.7418	7.51415	32.256	21.6197	28.6724	0	0	0	0	0	0	0	0	14.4245	18.3221	2.25356	3.65397	23.8251	35.2363	289.036	373.341	188.167	266.178	86.2979	122.285
2002	23	25.8107	0	0	0	0	0	0	0	0	9	17.6894	3	3.19617	30.4452	4.08251	3.1725	1.5215	5.7715	4.07638	360.395	248.48	111.915	31.0534	25.8308	7.89802	33.7289	22.6013	29.656	0	0	0	0	0	0	0	0	15.4524	19.3657	2.35093	3.80121	24.7492	36.8421	318.525	406.288	210.114	292.735	90.5059	129.722
2003	28	26.7393	0	0	0	0	0	0	0	0	11	18.7374	5	3.35615	31.2507	4.10354	3.1915	1.5295	5.8035	4.10616	389.497	273.219	116.278	29.8534	26.8986	8.28217	35.1808	23.0001	30.2578	0	0	0	0	0	0	0	0	16.534	20.4333	2.54812	3.954	25.6045	37.759	348.223	438.219	234.298	317.476	93.2632	135.646
2004	29	27.6277	3	3	1	3	4.0011	2.11039	2.3568	2.01513	8	19.7802	6	3.5158	31.9973	4.12481	3.2095	1.5385	5.8355	4.14049	419.34	298.847	120.493	28.7339	27.9383	8.66398	36.6023	23.3658	31.1433	1.99786	6.51382	1.05198	3.49291	1.23263	3.68698	0.987874	3.24343	17.6595	21.5367	2.68929	4.18737	26.4479	37.906	377.752	467.462	259.978	343.811	96.5562	141.786
2005	23	28.4707	5	2	3	4	6.28774	3.31696	3.7369	3.1895	4	20.8127	2	3.67402	32.6719	4.14631	3.2285	1.5475	5.8675	4.17803	449.85	325.318	124.532	27.683	28.9432	9.04103	37.9842	23.9711	32.3154	4.4426	8.872	2.45239	4.82224	2.55018	5.14893	2.34943	4.46372	18.7365	22.6342	2.81215	4.47692	27.5476	37.6577	404.368	498.269	287.042	370.484	101.035	147.33
2006	25	29.262	4	2	1	2	4.13127	2.17963	2.47766	2.11092	5	21.8298	4	3.82985	33.2585	4.16805	3.2475	1.5565	5.8995	4.21807	482.939	354.579	128.36	26.5789	29.9052	9.4107	39.3159	24.7973	33.0335	2.45483	6.61958	1.22726	3.59285	1.28506	4.12396	1.09205	3.40261	19.6184	23.8788	2.95084	4.65763	28.8196	38.0859	433.145	534.539	317.342	399.931	104.85	151.235
2007	29	29.9934	7	5	4	1	6.42337	3.38935	3.88812	3.30658	3	22.8259	3	3.98205	33.741	4.19003	3.2665	1.5665	5.9325	4.26037	516.505	384.573	131.932	25.5432	30.8149	9.76999	40.5849	25.8454	33.3485	4.7021	8.68708	2.27796	4.7113	2.56109	5.12234	2.13447	4.23354	20.4334	25.0369	3.10764	4.85162	28.9266	38.1205	467.746	569.277	343.583	430.142	110.113	152.076
2008	31	30.6557	8	2	2	8	7.98517	4.21411	4.87958	4.14216	0	23.7954	6	4.1294	34.1034	4.21226	3.2865	1.5755	5.9655	4.30493	550.426	415.229	135.197	24.5623	31.6615	10.1155	41.7769	26.9403	33.6433	6.38137	10.0064	3.31021	5.15559	3.54844	5.84091	2.91836	5.22822	21.6412	25.9658	3.28169	5.01204	28.994	39.3814	502.65	602.389	370.674	461.085	113.734	153.238
2009	27	31.2381	6	6	3	7	10.1085	5.33585	6.2379	5.28555	5	24.7319	5	4.27027	34.3296	4.23475	3.3065	1.5845	5.9995	4.35195	583.567	445.467	138.101	23.6649	32.4328	10.4432	42.876	27.7575	34.0291	8.5997	11.9496	4.67155	6.91275	4.7754	7.12823	4.12151	6.2072	22.5271	27.0001	3.38755	5.14248	28.907	40.1907	534.093	638.181	398.166	491.701	116.049	158.574
2010	39	31.7293	7	4	5	15	9.58319	5.06003	5.97402	5.05288	4	25.6287	6	4.40305	34.4037	4.25749	3.3265	1.5945	6.0335	4.40174	617.777	477.196	140.581	22.7559	33.1155	10.7488	43.8644	28.5108	34.6665	7.75977	11.4628	4.30511	6.40961	4.7391	7.09236	3.70301	6.14062	23.4808	27.8808	3.43029	5.29653	28.3523	41.3635	565.633	677.706	429.741	526.721	118.454	165.282
2011	37	32.1171	13	8	5	5	9.35138	4.93961	5.89145	4.97436	3	26.4782	3	4.52573	34.3098	4.28049	3.3465	1.6045	6.0685	4.45471	650.887	508.313	142.574	21.9046	33.6953	11.0275	44.7228	28.6131	35.4609	7.23754	11.3042	4.02624	6.36988	4.41593	7.25368	3.7065	6.14694	24.3268	28.7155	3.45768	5.58911	28.0609	41.7932	596.591	714.466	464.201	561.988	118.425	169.691
2012	31	32.389	8	0	8	5	8.2945	4.38365	5.28367	4.45375	2	27.2727	5	4.63633	34.0362	4.30376	3.3675	1.6145	6.1035	4.51131	683.719	539.702	144.017	21.0638	34.1574	11.274	45.4314	28.2374	36.3324	5.72942	10.6598	3.35885	6.10525	3.97915	6.83818	2.95192	5.68574	24.9992	29.5989	3.50002	5.86904	28.6429	41.3486	628.226	747.73	496.082	597.388	116.533	175.036
2013	24	32.5331	8	3	3	7	9.34705	4.94322	6.0235	5.06937	3	28.0034	1	4.73257	33.5777	4.3273	3.3885	1.6245	6.1385	4.57197	716.088	571.235	144.853	20.2283	34.4877	11.4831	45.9708	28.0814	36.2091	7.14098	11.4748	3.91093	6.64464	4.40228	7.29187	3.6539	6.35107	25.496	30.5442	3.56016	6.12838	28.4245	41.9615	660.816	781.305	525.584	632.597	116.955	178.026
2014	33	32.5395	10	9	8	1	10.1574	5.37618	6.62565	5.56793	3	28.6616	5	4.81239	32.93	4.35111	3.4095	1.6345	6.1745	4.63707	748.806	603.775	145.031	19.3683	34.6733	11.6496	46.3229	28.2396	36.14	7.87507	12.4338	4.46822	6.81604	4.89525	8.15222	4.07944	6.88542	26.0076	31.435	3.59525	6.29531	27.47	42.2232	695.654	819.342	559.49	668.256	118.095	180.003
2015	37	32.3992	9	6	10	4	9.69364	5.13577	6.40419	5.37453	4	29.2381	7	4.87358	32.089	4.37521	3.4305	1.6455	6.2105	4.70702	778.68	634.174	144.506	18.5578	34.7021	11.7687	46.4709	28.8079	36.3696	7.35752	12.4746	3.97547	6.49172	4.60285	8.04867	3.94341	6.99164	26.5546	32.2555	3.55971	6.61889	25.1811	45.0277	726.021	862.11	590.238	700.979	116.085	185.64
2016	35	32.1048	12	6	8	6	10.5038	5.5715	7.03295	5.89499	2	29.7239	5	4.91421	31.0504	4.39958	3.4525	1.6555	6.2475	4.78235	809.513	666.279	143.235	17.6939	34.5632	11.8356	46.3988	28.8308	36.926	7.53205	12.5784	4.01158	6.65813	4.57402	8.26209	3.98842	7.29017	26.9983	32.9894	3.47158	7.08515	20.1778	49.9023	754.297	907.81	619.439	734.351	112.534	198.481
2017	36	31.6493	14	5	9	1	9.61448	5.10685	6.52901	5.4668	6	30.1098	7	4.93218	29.81	4.42425	3.4745	1.6665	6.2845	4.86375	838.106	696.928	141.178	16.8449	34.2463	11.8454	46.0917	27.4655	37.6518	7.27104	12.5592	3.8201	6.95295	4.26434	8.47588	3.86288	7.48386	27.2736	33.6207	3.32492	7.47898	12.9775	55.1909	779.508	941.629	650.991	764.938	102.102	221.133
2018	23	31.0272	7	4	5	4	8.88424	4.72681	6.1241	5.12341	2	30.387	2	4.92569	28.3635	4.44922	3.4965	1.6775	6.3215	4.95218	866.252	727.955	138.297	15.965	33.7414	11.7937	45.5351	25.2005	39.5946	5.71795	12.3594	2.95505	7.01584	3.81643	8.41317	3.25253	7.70981	27.1614	34.1343	3.1143	7.88917	4.59401	61.2517	798.826	1001.39	684.91	794.285	90.9441	237.679
[truncated: 26 more columns]

## Sheet: Hetero_mig_SSA_CD4proxy
year	N_HIV_D	N_HIV_Obs_M	N_CD4_1_D	N_CD4_2_D	N_CD4_3_D	N_CD4_4_D	N_CD4_1_Obs_M	N_CD4_2_Obs_M	N_CD4_3_Obs_M	N_CD4_4_Obs_M	N_AIDS_D	N_AIDS_M	N_HIVAIDS_D	N_HIVAIDS_Obs_M	N_Inf_M	t_diag	t_diag_p50	t_diag_p25	t_diag_p75	D_Avg_Time	N_Alive	N_Alive_Diag_M	N_Und	N_Und_Alive_p	N_Und_CD4_3_M	N_Und_CD4_4_M	N_Und_CD4_3p4_M	N_HIV_Obs_M_LB	N_HIV_Obs_M_UB	N_CD4_1_Obs_M_LB	N_CD4_1_Obs_M_UB	N_CD4_2_Obs_M_LB	N_CD4_2_Obs_M_UB	N_CD4_3_Obs_M_LB	N_CD4_3_Obs_M_UB	N_CD4_4_Obs_M_LB	N_CD4_4_Obs_M_UB	N_AIDS_M_LB	N_AIDS_M_UB	N_HIVAIDS_Obs_M_LB	N_HIVAIDS_Obs_M_UB	N_Inf_M_LB	N_Inf_M_UB	N_Alive_LB	N_Alive_UB	N_Alive_Diag_M_LB	N_Alive_Diag_M_UB	N_Und_LB	N_Und_UB
1980	0	0.000306	0	0	0	0	0	0	0	0	0	0.000306	0	0.000306	0.237688	11.5671	10.8755	6.3895	17.2385	0.5	0.237674	0.000306	0.237369	99.8714	0.021744	0.004798	0.026542	0.000232	0.000408	0	0	0	0	0	0	0	0	0.000232	0.000408	0.000232	0.000408	0.180362	0.316247	0.180352	0.316229	0.000232	0.000408	0.18012	0.315821
1981	0	0.008501	0	0	0	0	0	0	0	0	0	0.008501	0	0.008501	1.55018	11.5671	10.8755	6.3895	17.2385	0.96322	1.78748	0.008806	1.77868	99.5073	0.226207	0.057243	0.28345	0.006452	0.011275	0	0	0	0	0	0	0	0	0.006452	0.011275	0.006452	0.011275	1.17921	2.04285	1.35909	2.35858	0.006684	0.011683	1.35241	2.3469
1982	0	0.049485	0	0	0	0	0	0	0	0	0	0.049485	0	0.049485	3.86269	11.5671	10.8755	6.3895	17.2385	1.37293	5.64799	0.058292	5.5897	98.9679	0.829061	0.234824	1.06388	0.03765	0.065178	0	0	0	0	0	0	0	0	0.03765	0.065178	0.03765	0.065178	2.95181	5.02613	4.30925	7.38183	0.044333	0.076861	4.26491	7.30497
1983	0	0.157875	0	0	0	0	0	0	0	0	0	0.157875	0	0.157875	6.8343	11.5671	10.8755	6.3895	17.2385	1.76552	12.4753	0.216167	12.2592	98.2672	2.00902	0.625323	2.63435	0.120473	0.20625	0	0	0	0	0	0	0	0	0.120473	0.20625	0.120473	0.20625	5.25198	8.75344	9.55592	16.1262	0.164806	0.28311	9.39111	15.8431
1984	0	0.001588	0	0	0	0	0	0	0	0	0	0.378782	0	0.33002	10.1241	16.1178	0.0005	0.0005	0.0005	141.267	22.5849	0.217754	22.3672	99.0358	4.02484	1.08289	5.10773	0.000456	5.94979	0	0	0	0	0	0	0	0	0.290368	0.498327	0.25127	0.399205	7.83374	12.7513	17.3786	28.821	0.186003	6.22089	17.0621	27.125
1985	1	0.001318	0	0	0	0	0	0	0	0	0	0.732482	0	0.574884	13.3913	16.1178	0.0005	0.0005	0.0005	326.777	35.9508	0.219072	35.7318	99.3906	6.90954	1.84752	8.75706	0	8.32757	0	0	0	0	0	0	0	0	0.563891	0.956407	0.423587	0.693526	10.4511	16.6475	27.8105	45.3055	0.186003	14.5485	26.5097	43.0131
1986	6	0.111835	0	0	0	0	0	0	0	0	0	1.24481	0	0.946815	16.2949	16.1178	0.0005	0.0005	0.0005	9.67749	52.204	0.330907	51.873	99.3661	10.6657	2.91664	13.5823	0.09381	11.1545	0	0	0	0	0	0	0	0	0.962794	1.6076	0.606376	1.14028	12.8581	20.0126	40.637	65.1785	0.279813	25.703	36.5229	62.3333
1987	14	12.4236	0	0	0	0	0	0	0	0	1	1.9561	0	1.30272	18.494	4.05696	3.1485	1.5095	5.7315	2.81867	68.6405	10.7545	57.886	84.3321	12.2805	3.42864	15.7091	9.36987	14.5131	0	0	0	0	0	0	0	0	1.51998	2.46898	0.838321	1.57474	14.8087	22.884	53.4024	85.1974	8.58691	34.4425	44.479	70.0624
1988	19	13.9264	0	0	0	0	0	0	0	0	0	2.81859	0	1.51434	19.7259	4.05696	3.1485	1.5095	5.7315	3.0723	84.2997	20.681	63.6187	75.4673	13.8235	3.91658	17.74	11.1346	16.0778	0	0	0	0	0	0	0	0	2.20308	3.5115	1.07466	1.84572	16.1195	24.0499	65.4713	105.049	16.0579	43.9984	49.4133	77.2634
1989	30	15.3119	0	0	0	0	0	0	0	0	1	3.80975	1	1.70971	20.2217	4.05696	3.1485	1.5095	5.7315	3.28346	103.446	34.9929	68.4531	66.1728	15.1859	4.35629	19.5422	12.3749	17.7387	0	0	0	0	0	0	0	0	2.99937	4.68562	1.28371	2.09537	16.8252	23.7275	81.4155	129.472	27.9331	58.8283	53.9826	81.7302
1990	11	16.4858	0	0	0	0	0	0	0	0	1	4.89431	0	1.88261	20.5314	4.05696	3.1485	1.5095	5.7315	3.4728	121.894	49.4787	72.4158	59.4086	16.3414	4.73775	21.0792	13.5301	19.0263	0	0	0	0	0	0	0	0	3.88784	5.99632	1.43098	2.29456	16.8983	24.2547	97.2734	152.466	39.444	74.2642	56.6079	87.1521
1991	35	17.4806	0	0	0	0	0	0	0	0	2	6.03925	0	2.0326	21.2209	4.05696	3.1485	1.5095	5.7315	3.63771	143.026	66.9592	76.0665	53.1838	17.3578	5.07303	22.4309	14.6525	19.9051	0	0	0	0	0	0	0	0	4.85104	7.42935	1.5412	2.49402	16.9403	26.0734	116.562	174.686	53.6154	92.7046	57.8888	91.9704
1992	29	18.4405	0	0	0	0	0	0	0	0	4	7.22503	1	2.16892	22.8556	4.05696	3.1485	1.5095	5.7315	3.76207	159.786	79.3997	80.386	50.3086	18.3928	5.39833	23.7911	15.7427	20.7742	0	0	0	0	0	0	0	0	5.88395	8.89926	1.60939	2.67465	17.8391	28.3895	132.278	191.248	63.5033	105.77	60.2483	98.7033
1993	28	19.6022	0	0	0	0	0	0	0	0	3	8.45349	1	2.3108	26.0014	4.05696	3.1485	1.5095	5.7315	3.82383	180.685	94.0018	86.6834	47.9748	19.6845	5.77344	25.458	16.7346	22.2774	0	0	0	0	0	0	0	0	7.00026	10.2034	1.67662	2.89175	20.5787	32.0076	149.422	210.825	75.9612	120.425	66.8622	107.11
1994	16	21.2772	0	0	0	0	0	0	0	0	6	9.75406	4	2.48704	31.224	4.05696	3.1485	1.5095	5.7315	3.80536	207.8	111.279	96.5206	46.4489	21.5405	6.27961	27.8201	17.9998	24.1755	0	0	0	0	0	0	0	0	8.23719	11.5029	1.8182	3.11116	25.7433	38.0013	171.864	240.424	90.8347	138.161	74.5218	120.439
1995	26	23.8366	0	0	0	0	0	0	0	0	6	11.1881	2	2.73474	39.087	4.05696	3.1485	1.5095	5.7315	3.70568	238.766	127.116	111.65	46.7614	24.3252	7.01664	31.3418	20.2676	26.9521	0	0	0	0	0	0	0	0	9.49198	12.8614	2.05208	3.44838	33.6243	46.1793	200.773	279.83	105.262	154.398	88.1563	139.236
1996	30	28.0789	0	0	0	0	0	0	0	0	7	12.8705	2	3.03486	49.8859	4.05696	3.1485	1.5095	5.7315	3.56607	282.518	149.195	133.323	47.1911	28.3917	7.56478	35.9565	24.2752	31.5081	0	0	0	0	0	0	0	0	10.922	14.6469	2.30613	3.8305	43.9297	56.7459	238.195	331.804	125.972	176.372	108.905	163.721
1997	26	33.8456	0	0	0	0	0	0	0	0	4	14.9261	1	3.20816	62.8875	4.06263	3.1385	1.5015	5.7235	3.40374	343.264	181.04	162.224	47.2592	33.9756	7.9037	41.8793	29.7277	38.2381	0	0	0	0	0	0	0	0	12.9149	17.1762	2.40723	4.01228	56.8029	69.0298	295.648	400.091	153.886	207.797	135.956	194.248
1998	25	40.8892	0	0	0	0	0	0	0	0	8	17.4603	2	3.36657	76.9318	4.0825	3.1425	1.4995	5.7405	3.24765	412.048	213.929	198.118	48.0814	41.1154	8.36453	49.4799	36.4666	46.3701	0	0	0	0	0	0	0	0	15.0721	20.1777	2.50697	4.19037	71.1885	81.9962	361.935	475.385	182.963	245.959	170.961	231.326
1999	57	49.2644	0	0	0	0	0	0	0	0	4	20.5871	3	3.58517	90.8493	4.11247	3.1565	1.5015	5.7755	3.14853	497.739	258.194	239.545	48.1266	49.6215	8.96628	58.5878	44.2171	54.5423	0	0	0	0	0	0	0	0	18.0898	23.737	2.71288	4.27541	85.3379	96.1346	445.677	565.436	224.883	295.001	208.646	273.579
2000	67	58.6285	0	0	0	0	0	0	0	0	12	24.3785	8	3.84797	103.471	4.15027	3.1775	1.5055	5.8225	3.11746	594.04	309.822	284.217	47.8448	59.1076	9.61836	68.7259	53.8094	63.5734	0	0	0	0	0	0	0	0	21.762	27.7921	2.94207	4.61524	97.7551	108.921	537.841	662.481	273.268	351.808	254.381	318.325
2001	62	68.3984	0	0	0	0	0	0	0	0	8	28.8498	2	4.11334	113.626	4.19457	3.2045	1.5135	5.8805	3.14594	703.484	374.221	329.264	46.8047	69.0253	10.2173	79.2426	64.1808	72.9311	0	0	0	0	0	0	0	0	26.0927	32.2418	3.12063	5.00779	107.931	119.862	645.809	771.978	334.519	417.685	297.517	362.161
2002	96	77.8615	0	0	0	0	0	0	0	0	12	33.9499	7	4.34043	120.146	4.2446	3.2375	1.5235	5.9475	3.2229	821.44	450.082	371.357	45.2081	78.6968	10.674	89.3707	73.8096	82.6523	0	0	0	0	0	0	0	0	31.0589	37.2567	3.30482	5.34077	114.022	126.571	759.897	889.403	407.496	496.884	334.346	402.571
2003	84	86.233	0	0	0	0	0	0	0	0	17	39.5541	3	4.49511	121.875	4.29989	3.2745	1.5355	6.0225	3.34116	939.116	532.315	406.801	43.3174	87.3429	10.916	98.2589	82.3993	91.7939	0	0	0	0	0	0	0	0	36.611	42.7168	3.42711	5.59108	115.357	130.057	875.641	1006.12	486.934	586.214	364.804	438.687
2004	85	92.7089	10	0	16	16	13.2402	9.03638	10.307	12.5707	4	45.4615	3	4.55056	118.233	4.36023	3.3155	1.5495	6.1045	3.49848	1057.15	625.024	432.125	40.8764	94.1646	10.8929	105.057	88.6472	98.9543	10.0393	16.8493	6.94363	11.091	7.53813	12.7453	9.62627	15.2064	42.4845	48.4286	3.4678	5.70543	111.706	126.566	989.883	1122.92	576.948	681.305	388.95	464.809
2005	74	96.6584	2	3	11	9	9.06557	6.5095	7.62871	9.249	6	51.4093	3	4.4925	110.038	4.42554	3.3595	1.5655	6.1935	3.69399	1164.99	719.683	445.306	38.2241	98.5646	10.5958	109.16	91.9926	102.397	6.14856	11.5438	4.46209	8.38456	4.92641	9.76538	6.27532	11.6331	48.1987	54.1544	3.41826	5.70239	103.849	118.057	1092.21	1229.42	669.338	777.727	402.13	478.198
2006	95	97.7979	0	5	7	18	8.3565	6.33527	7.63539	9.18082	8	57.1093	6	4.32425	98.4688	4.49584	3.4085	1.5835	6.2885	3.92631	1262.27	816.48	445.787	35.3163	100.24	10.051	110.291	93.2367	103.432	5.76803	11.3634	4.05642	8.79397	5.17931	10.5768	6.39724	12.2127	53.6763	60.1421	3.28349	5.58838	92.904	105.845	1184.58	1328.47	763.22	875.822	403.338	479.233
2007	80	96.1549	6	10	13	12	11.9923	9.63458	11.9471	14.2218	3	62.2788	1	4.06044	84.7082	4.57127	3.4605	1.6035	6.3915	4.19531	1344.8	910.635	434.161	32.2845	99.1592	9.30478	108.464	91.8732	101.892	9.80044	15.3049	7.64185	11.755	9.14956	14.7663	11.563	18.6727	58.6485	65.5972	3.07676	5.33347	79.7332	91.2292	1262.87	1415.5	854.886	970.956	393.172	467.376
2008	98	91.9959	12	26	30	9	16.9169	14.4607	18.4529	21.7173	8	66.6657	3	3.72254	69.9387	4.65203	3.5165	1.6245	6.5025	4.50287	1409.57	997.631	411.939	29.2245	95.5256	8.41438	103.94	87.7883	97.6324	14.7952	19.7179	12.7405	17.3007	15.3847	21.7372	18.4108	24.8723	62.8755	69.96	2.81567	4.9634	65.6538	75.5105	1324.04	1480.95	939.497	1058.75	373.086	444.995
2009	101	85.7672	12	25	18	25	14.7763	13.5005	17.7281	20.6067	3	70.0701	2	3.33529	55.3428	4.73839	3.5755	1.6485	6.6205	4.85248	1460.77	1079.4	381.368	26.1074	89.7364	7.44111	97.1775	81.6682	91.0372	12.4428	17.2018	11.5084	16.1188	15.0058	20.6222	17.9069	23.7176	66.1947	73.5846	2.51947	4.51017	51.6209	59.6938	1372.2	1535.51	1019.03	1144.4	345.212	412.538
2010	79	78.046	9	11	21	23	13.0995	12.8589	17.372	19.93	4	72.3599	3	2.92428	42.1031	4.8307	3.6395	1.6735	6.7465	5.24779	1501.74	1156.44	345.296	22.9931	82.3461	6.44632	88.7924	73.6958	82.9241	11.3206	15.288	11.0753	15.926	14.5562	19.8663	16.8844	23.1889	68.5362	76.2617	2.19694	4.0085	38.8202	45.396	1411.99	1580.3	1094.05	1227.76	309.951	374.59
2011	74	69.5019	1	14	13	31	10.4074	11.0397	15.3332	17.3599	5	73.4829	1	2.51473	31.3762	4.92936	3.7065	1.7005	6.8815	5.68901	1528.01	1220.95	307.06	20.0955	74.0331	5.48862	79.5217	65.4543	73.9511	8.54587	12.2446	8.86222	13.382	13.1992	17.3606	14.7618	20.1505	69.7591	77.3853	1.86875	3.4937	28.3318	34.7029	1438.3	1609.85	1156.79	1293.42	274.03	334.141
2012	56	60.8403	17	6	6	12	7.90893	9.12314	13.0051	14.5394	5	73.4718	2	2.12961	23.7848	5.03488	3.7785	1.7285	7.0255	6.16718	1551.7	1281.79	269.91	17.3945	65.5161	4.61625	70.1323	57.1198	65.0329	6.06657	9.19207	7.28898	11.2369	10.3944	15.7223	11.7165	17.108	69.6183	77.5569	1.56524	2.99919	19.7201	27.8158	1462.71	1636.62	1215.4	1351.15	241.102	293.772
2013	52	52.6635	4	2	13	24	7.5781	9.57308	13.9637	15.4329	6	72.4345	5	1.78572	19.126	5.14779	3.8555	1.7595	7.1795	6.66292	1569.74	1333.45	236.294	15.053	57.4038	3.85831	61.2621	49.1238	56.3743	6.22123	9.20818	7.97644	11.6843	11.7305	16.3617	12.2657	18.0671	68.6479	76.5774	1.29737	2.54599	13.6797	24.1833	1482.18	1657.86	1261.5	1402.92	209.749	256.673
2014	42	45.3929	5	6	10	8	5.1082	7.12589	10.5876	11.5869	2	70.5315	5	1.49229	17.0662	5.26877	3.9375	1.7925	7.3455	7.14546	1585.74	1377.84	207.902	13.1107	50.1535	3.22866	53.3822	42.0839	48.7126	3.86271	6.83161	5.39866	9.30712	8.19652	12.5075	9.50672	13.816	66.9095	74.7361	1.08149	2.13026	9.90669	23.3606	1500.32	1674.09	1302.28	1448.56	181.235	228.909
2015	38	39.293	9	6	7	9	4.52768	7.04825	10.6021	11.5145	3	67.9573	3	1.2531	17.2716	5.39857	4.0255	1.8275	7.5225	7.56825	1602.96	1417.14	185.825	11.5926	44.0829	2.7302	46.8131	35.4728	42.6741	3.09072	5.89664	5.3531	8.7386	8.25505	12.8344	9.02204	13.4145	64.5433	72.2502	0.920509	1.7822	8.03952	25.1948	1520.47	1686.81	1340.48	1491.24	153.517	207.768
2016	36	34.5021	8	5	9	10	3.78969	6.67751	10.0923	10.908	5	64.9233	2	1.06789	19.4087	5.53805	4.1185	1.8645	7.7135	7.86946	1621.32	1450.64	170.685	10.5275	39.3887	2.3581	41.7468	29.5683	37.9126	2.48807	5.31599	5.18393	8.57701	8.03547	11.782	8.80818	12.4255	61.6567	68.9518	0.773429	1.50429	7.71642	29.5533	1542.63	1702.5	1373.72	1528.15	132.531	194.511
2017	34	31.0591	2	13	12	6	3.10639	6.32557	9.52786	10.2796	2	61.6434	0	0.933696	23.1438	5.68822	4.2195	1.9045	7.9195	7.98487	1644.43	1481.7	162.728	9.89574	36.1665	2.10244	38.2689	25.3141	35.2472	1.54096	5.00065	4.51045	8.52696	7.30807	11.5452	7.56659	12.0955	57.8304	65.2904	0.637976	1.29371	8.57567	35.8299	1550.87	1730.56	1405.21	1561.51	116.006	196.996
2018	26	28.9262	4	3	8	10	2.46241	5.98509	8.92088	9.63208	1	58.322	0	0.845779	28.1432	5.85025	4.3265	1.9465	8.1415	7.87476	1672.53	1510.62	161.908	9.68041	34.4297	1.95019	36.3799	22.4864	34.4876	0.79599	4.47583	4.18612	8.33426	6.2064	11.6609	6.40613	11.8748	54.0447	62.5361	0.523492	1.27416	10.2556	43.7322	1562.29	1788.39	1435.33	1588.47	105.005	206.135
[truncated: 26 more columns]

## Sheet: Hetero_mig_nonSSA_CD4proxy
year	N_HIV_D	N_HIV_Obs_M	N_CD4_1_D	N_CD4_2_D	N_CD4_3_D	N_CD4_4_D	N_CD4_1_Obs_M	N_CD4_2_Obs_M	N_CD4_3_Obs_M	N_CD4_4_Obs_M	N_AIDS_D	N_AIDS_M	N_HIVAIDS_D	N_HIVAIDS_Obs_M	N_Inf_M	t_diag	t_diag_p50	t_diag_p25	t_diag_p75	D_Avg_Time	N_Alive	N_Alive_Diag_M	N_Und	N_Und_Alive_p	N_Und_CD4_3_M	N_Und_CD4_4_M	N_Und_CD4_3p4_M	N_HIV_Obs_M_LB	N_HIV_Obs_M_UB	N_CD4_1_Obs_M_LB	N_CD4_1_Obs_M_UB	N_CD4_2_Obs_M_LB	N_CD4_2_Obs_M_UB	N_CD4_3_Obs_M_LB	N_CD4_3_Obs_M_UB	N_CD4_4_Obs_M_LB	N_CD4_4_Obs_M_UB	N_AIDS_M_LB	N_AIDS_M_UB	N_HIVAIDS_Obs_M_LB	N_HIVAIDS_Obs_M_UB	N_Inf_M_LB	N_Inf_M_UB	N_Alive_LB	N_Alive_UB	N_Alive_Diag_M_LB	N_Alive_Diag_M_UB	N_Und_LB	N_Und_UB
1980	0	5.9e-05	0	0	0	0	0	0	0	0	0	5.9e-05	0	5.9e-05	0.045903	11.5671	10.8755	6.3895	17.2385	0.5	0.0459	5.9e-05	0.045841	99.8713	0.004201	0.000927	0.005128	3.5e-05	8.7e-05	0	0	0	0	0	0	0	0	3.5e-05	8.7e-05	3.5e-05	8.7e-05	0.026989	0.067685	0.026988	0.067681	3.5e-05	8.7e-05	0.026953	0.067594
1981	0	0.00164	0	0	0	0	0	0	0	0	0	0.00164	0	0.00164	0.298396	11.5671	10.8755	6.3895	17.2385	0.963776	0.344225	0.001699	0.342526	99.5064	0.043587	0.011033	0.05462	0.000964	0.002418	0	0	0	0	0	0	0	0	0.000964	0.002418	0.000964	0.002418	0.175447	0.439991	0.202392	0.507566	0.000999	0.002505	0.201394	0.50506
1982	0	0.009524	0	0	0	0	0	0	0	0	0	0.009524	0	0.009524	0.740338	11.5671	10.8755	6.3895	17.2385	1.37418	1.08414	0.011223	1.07292	98.9648	0.159275	0.045136	0.204411	0.0056	0.014043	0	0	0	0	0	0	0	0	0.0056	0.014043	0.0056	0.014043	0.435294	1.09164	0.637439	1.59859	0.006599	0.016548	0.630841	1.58204
1983	0	0.0303	0	0	0	0	0	0	0	0	0	0.0303	0	0.0303	1.30295	11.5671	10.8755	6.3895	17.2385	1.76802	2.38576	0.041523	2.34423	98.2596	0.384647	0.119831	0.504478	0.017815	0.044678	0	0	0	0	0	0	0	0	0.017815	0.044678	0.017815	0.044678	0.766091	1.92123	1.40274	3.51784	0.024414	0.061226	1.37833	3.45662
1984	0	0.000226	0	0	0	0	0	0	0	0	0	0.072466	0	0.063138	1.91746	16.1366	0.0005	0.0005	0.0005	189.288	4.30043	0.041749	4.25868	99.0292	0.767671	0.206758	0.974429	7.8e-05	2.88233	0	0	0	0	0	0	0	0	0.042703	0.112196	0.036735	0.086754	1.1274	2.82733	2.52853	6.34152	0.032201	2.94649	2.46299	5.8455
1985	0	0.00023	0	0	0	0	0	0	0	0	0	0.139622	0	0.10955	2.51509	16.1366	0.0005	0.0005	0.0005	357.544	6.81069	0.041978	6.76871	99.3836	1.31209	0.351255	1.66334	0	3.12055	0	0	0	0	0	0	0	0	0.082333	0.21263	0.048293	0.150133	1.47879	3.70854	4.00455	10.0449	0.033206	6.06704	3.2847	9.27634
1986	0	0.021466	0	0	0	0	0	0	0	0	0	0.236272	0	0.17962	3.02705	16.1366	0.0005	0.0005	0.0005	9.60797	9.82982	0.063445	9.76638	99.3546	2.01486	0.551839	2.5667	0.016875	3.72519	0	0	0	0	0	0	0	0	0.139392	0.35823	0.056245	0.245646	1.77981	4.46345	5.7799	14.5009	0.050081	9.8359	4.09237	13.3647
1987	3	2.66546	0	0	0	0	0	0	0	0	0	0.370331	0	0.241803	3.3846	3.59002	2.7575	1.3275	5.0445	2.82159	13.2038	2.72891	10.4749	79.3323	2.22404	0.621584	2.84562	1.22428	3.65424	0	0	0	0	0	0	0	0	0.218121	0.551152	0.084012	0.330696	1.99003	4.99066	7.76396	19.4817	1.88268	11.7496	5.81396	14.3555
1988	7	2.8721	0	0	0	0	0	0	0	0	1	0.530551	1	0.269981	3.53836	3.59002	2.7575	1.3275	5.0445	3.06331	15.7302	4.601	11.1292	70.7505	2.41302	0.683461	3.09648	1.68907	3.94142	0	0	0	0	0	0	0	0	0.312323	0.785747	0.136421	0.373075	2.08344	5.21175	8.84073	23.681	2.57687	13.1742	6.12529	15.4919
1989	3	3.05144	0	0	0	0	0	0	0	0	0	0.712015	0	0.293901	3.56163	3.59002	2.7575	1.3275	5.0445	3.25489	18.2789	6.65245	11.6264	63.6058	2.56523	0.734495	3.29973	1.79921	4.18802	0	0	0	0	0	0	0	0	0.419163	1.05223	0.154074	0.421166	2.12505	5.1937	9.9585	27.8598	3.34755	15.3686	6.35806	16.4973
1990	1	3.19035	0	0	0	0	0	0	0	0	0	0.90775	0	0.313299	3.60704	3.59002	2.7575	1.3275	5.0445	3.41744	20.8721	8.8428	12.0293	57.6334	2.68601	0.775602	3.46162	1.89437	4.36356	0	0	0	0	0	0	0	0	0.535197	1.33845	0.162264	0.459555	2.24071	5.09749	11.1895	31.9403	4.21134	18.1155	6.60527	17.5276
1991	3	3.3137	0	0	0	0	0	0	0	0	1	1.11251	0	0.32952	3.83105	3.59002	2.7575	1.3275	5.0445	3.53947	24.6886	12.1565	12.5321	50.7607	2.80442	0.813335	3.61775	2.00456	4.50826	0	0	0	0	0	0	0	0	0.659067	1.6334	0.170231	0.490571	2.57531	5.08863	13.7326	37.0105	6.20869	22.2467	7.17356	18.1409
1992	4	3.4781	0	0	0	0	0	0	0	0	3	1.32554	1	0.346323	4.39011	3.59002	2.7575	1.3275	5.0445	3.59145	26.0635	12.6346	13.4289	51.5237	2.97108	0.860099	3.83118	2.24372	4.75013	0	0	0	0	0	0	0	0	0.793467	1.93007	0.186865	0.519487	3.33645	5.49373	13.9409	39.3234	5.45241	23.6832	8.48853	19.01
1993	5	3.76516	0	0	0	0	0	0	0	0	1	1.55252	1	0.369848	5.44068	3.59002	2.7575	1.3275	5.0445	3.54469	30.4878	15.3998	15.0881	49.4888	3.25522	0.933755	4.18897	2.61838	4.99641	0	0	0	0	0	0	0	0	0.946567	2.22773	0.213352	0.562811	4.32259	6.66589	17.6247	44.2975	7.14951	27.4615	10.1897	20.7054
1994	4	4.27583	0	0	0	0	0	0	0	0	0	1.80703	0	0.408387	7.13922	3.59002	2.7575	1.3275	5.0445	3.39699	36.609	18.6756	17.9335	48.9864	3.7412	1.0569	4.7981	3.16588	5.46253	0	0	0	0	0	0	0	0	1.14396	2.53381	0.244624	0.621171	5.68996	8.51377	22.3045	50.5166	9.61733	31.7519	12.6231	24.3899
1995	3	5.12575	0	0	0	0	0	0	0	0	1	2.11166	0	0.472065	9.64169	3.59002	2.7575	1.3275	5.0445	3.18607	44.2299	21.8013	22.4286	50.7091	4.52551	1.25608	5.78158	4.0827	6.25494	0	0	0	0	0	0	0	0	1.39858	2.86522	0.295174	0.707773	7.90029	11.3618	29.1	59.2046	12.2953	35.8715	16.144	30.2828
1996	7	6.368	0	0	0	0	0	0	0	0	1	2.4986	1	0.572218	13.031	3.59002	2.7575	1.3275	5.0445	2.97778	57.2357	28.1693	29.0663	50.7836	5.71833	1.55824	7.27657	5.27936	7.49515	0	0	0	0	0	0	0	0	1.71096	3.24988	0.374343	0.837766	10.7421	15.5112	43.3357	73.068	17.7537	43.2018	21.3514	37.7088
1997	8	8.06173	0	0	0	0	0	0	0	0	1	3.0074	0	0.719495	17.1099	3.66512	2.8185	1.3555	5.1525	2.82003	73.3138	35.2311	38.0828	51.9449	7.40077	1.98633	9.3871	6.76257	9.40278	0	0	0	0	0	0	0	0	2.2072	3.79827	0.490153	1.01264	14.006	20.4482	56.1003	92.3548	23.7122	51.2061	28.6742	49.2017
1998	8	10.2593	0	0	0	0	0	0	0	0	7	3.67857	5	0.921449	21.5652	3.74377	2.8835	1.3855	5.2665	2.73813	94.8384	45.4903	49.3481	52.0339	9.58873	2.55003	12.1388	8.6452	11.7354	0	0	0	0	0	0	0	0	2.92867	4.51738	0.631243	1.27526	17.6319	25.7742	73.4168	118.49	32.7794	62.3052	37.6978	63.4721
1999	13	12.8826	0	0	0	0	0	0	0	0	2	4.54719	1	1.17925	26.081	3.82623	2.9505	1.4175	5.3855	2.72881	118.867	56.3729	62.4946	52.575	12.2446	3.24306	15.4876	10.7319	14.6563	0	0	0	0	0	0	0	0	3.62346	5.55396	0.818022	1.59387	21.3805	31.0877	92.4712	148.149	43.7455	73.5306	48.071	79.9706
2000	23	15.8036	0	0	0	0	0	0	0	0	5	5.63767	4	1.4878	30.3414	3.91278	3.0215	1.4505	5.5105	2.77666	146.143	69.1765	76.9668	52.6653	15.2841	4.04526	19.3294	13.1383	18.0325	0	0	0	0	0	0	0	0	4.51396	6.88391	1.0371	1.98036	25.0128	35.9868	114.401	177.831	53.8838	87.1027	59.4713	97.8759
2001	14	18.8604	0	0	0	0	0	0	0	0	2	6.95967	1	1.83655	34.0304	4.00374	3.0965	1.4855	5.6415	2.86696	179.093	87.0368	92.0559	51.4012	18.5828	4.92458	23.5074	15.8502	21.5501	0	0	0	0	0	0	0	0	5.58161	8.38821	1.28028	2.39867	28.4427	40.0699	143.193	214.011	69.4871	106.918	71.4008	116.144
2002	21	21.8696	0	0	0	0	0	0	0	0	2	8.50499	1	2.21033	36.8323	4.09944	3.1755	1.5225	5.7795	2.98966	214.828	107.906	106.921	49.7707	21.9806	5.8389	27.8195	18.6286	24.907	0	0	0	0	0	0	0	0	6.93081	10.0183	1.53841	2.84779	30.9718	42.9352	173.797	255.006	87.1373	129.642	83.2805	133.54
2003	29	24.6351	0	0	0	0	0	0	0	0	7	10.2454	4	2.59007	38.4345	4.20027	3.2585	1.5625	5.9245	3.13956	252.148	131.542	120.606	47.8316	25.286	6.73746	32.0234	21.0116	27.9843	0	0	0	0	0	0	0	0	8.44281	12.0045	1.81553	3.35324	32.5223	44.0044	205.848	297.498	107.805	155.393	94.4594	148.67
2004	36	26.9602	2	4	5	5	4.85984	2.7767	2.96165	2.64687	8	12.1318	7	2.95355	38.6787	4.30665	3.3465	1.6045	6.0775	3.31517	288.696	156.502	132.195	45.7902	28.2938	7.56517	35.8589	22.9972	30.4976	3.33316	7.37961	1.89341	4.04642	2.12772	4.38927	1.84024	3.6522	10.0314	14.1464	2.08963	3.84065	33.135	43.3276	239.847	338.818	130.293	182.163	104.316	161.779
2005	23	28.6941	0	8	2	2	4.89894	2.88163	3.16554	2.91667	6	14.0978	1	3.27897	37.7778	4.41905	3.4405	1.6495	6.2385	3.51525	326.33	185.196	141.134	43.2488	30.8419	8.27574	39.1177	24.4852	32.627	3.18672	6.52527	1.87501	3.70822	2.04472	4.1352	1.85507	3.78937	11.7505	16.4143	2.34811	4.26972	32.1281	42.0959	276.884	380.553	154.599	212.358	112.467	171.717
2006	22	29.7728	1	0	1	1	1.27062	0.771188	0.873937	0.830396	3	16.0691	1	3.54979	36.0416	4.53801	3.5395	1.6965	6.4095	3.73691	361.215	213.969	147.246	40.7641	32.8363	8.83943	41.6757	25.6014	33.7912	0.289687	2.59024	0.181902	1.54557	0.201924	1.80977	0.164082	1.57757	13.6102	18.6524	2.5819	4.55983	30.1772	41.1969	311.139	418.659	181.44	242.92	118.456	177.36
2007	22	30.2094	1	1	5	5	4.68141	2.93832	3.4391	3.36983	1	17.9722	0	3.75683	33.7808	4.66409	3.6445	1.7475	6.5895	3.9768	394.83	244.178	150.652	38.1561	34.2467	9.24359	43.4903	25.8587	33.7345	2.92556	6.33638	1.83017	4.23465	2.20923	4.9368	1.99992	4.9538	15.3612	20.7584	2.72783	4.74049	27.3605	40.115	341.375	454.47	209.319	276.102	123.09	178.368
2008	33	30.0725	9	4	5	5	6.20732	4.03857	4.88585	4.93584	3	19.7403	3	3.89743	31.3058	4.79798	3.7565	1.8025	6.7815	4.23133	425.964	274.251	151.713	35.6164	35.1009	9.49165	44.5925	25.6495	33.8734	4.78109	7.85945	3.1264	5.4398	3.74834	6.40115	3.4397	6.8555	16.9882	22.6515	2.89978	4.83343	23.2844	38.772	368.335	482.658	236.366	310.838	125.615	178.645
2009	27	29.4712	2	5	11	3	6.84144	4.62575	5.78671	6.02453	2	21.3204	4	3.97572	28.9273	4.94042	3.8755	1.8605	6.9855	4.49599	451.716	300.722	150.994	33.4268	35.4775	9.60135	45.0788	25.2196	33.459	5.26501	8.27024	3.75804	5.67073	4.46973	6.96487	4.45007	7.73036	18.3179	24.2583	3.05111	4.94092	21.1707	36.9903	391.807	505.832	258.422	341.852	126.388	175.808
2010	25	28.5411	12	6	3	1	6.53244	4.60306	5.95367	6.38361	3	22.6761	2	4.00136	26.9557	5.09224	4.0025	1.9235	7.2015	4.76415	476.495	327.263	149.232	31.3187	35.5009	9.60305	45.1039	24.5766	32.6914	5.22752	8.00731	3.47722	5.77993	4.67725	7.30671	4.69372	8.34061	19.4771	25.4438	3.02588	4.98447	20.2595	34.8153	413.216	529.48	283.083	372.637	122.601	175.769
2011	23	27.4348	5	4	1	10	5.59879	4.12439	5.51117	6.08009	1	23.7921	1	3.98891	25.6957	5.25442	4.1385	1.9915	7.4325	5.02576	501.015	353.698	147.317	29.4037	35.3363	9.5381	44.8744	23.1451	31.5051	4.08644	7.18038	3.04996	5.20218	4.19522	7.05482	4.60198	7.62271	20.7022	26.4097	2.97725	5.03331	19.379	32.6056	436.522	553.822	307.798	400.868	117.102	176.56
2012	33	26.3097	3	8	5	5	4.14367	3.20267	4.41399	5.00412	5	24.6751	5	3.9571	25.3298	5.42805	4.2855	2.0645	7.6795	5.26667	526.17	380.007	146.163	27.7786	35.1737	9.45488	44.6285	22.001	30.7546	3.08272	5.84916	2.18404	4.49175	2.88231	6.01118	3.37145	6.76174	21.3007	27.247	2.86078	5.02725	19.2938	31.2856	461.708	583.218	331.041	426.206	114.493	176.144
2013	22	25.3019	5	3	5	4	4.95442	4.03668	5.72507	6.65965	3	25.352	5	3.92608	25.8519	5.61439	4.4425	2.1445	7.9445	5.47189	548.849	402.309	146.54	26.6994	35.1937	9.4008	44.5945	20.9594	29.4735	3.82524	6.25139	2.98054	5.24385	4.30499	7.56105	5.01612	8.34021	21.9007	27.9242	2.71315	5.0203	18.6475	31.7593	485.826	608.329	350.875	448.037	118.202	174.685
2014	23	24.5102	0	5	8	5	4.45365	3.85143	5.60748	6.68279	5	25.865	5	3.91487	27.2257	5.81488	4.6115	2.2305	8.2285	5.62955	575.902	426.819	149.082	25.8868	35.5574	9.41865	44.976	20.8432	27.9237	3.32677	5.58605	2.77679	5.1219	4.14397	7.42332	5.10801	8.19445	22.5947	28.6136	2.60956	5.04438	17.5382	35.0889	515.927	635.414	373.612	474.647	116.601	176.896
2015	33	23.9997	5	2	7	11	3.85934	3.57895	5.33909	6.51052	3	26.2674	7	3.94034	29.4152	6.03121	4.7945	2.3255	8.5345	5.73307	605.143	450.819	154.324	25.5021	36.4065	9.54604	45.9525	20.3554	27.2447	2.46732	4.93825	2.43562	4.84636	3.80989	7.23133	4.69945	7.91135	23.0773	29.0435	2.62516	5.09153	16.1982	41.0064	544.011	670.07	396.63	497.894	114.689	188.208
2016	26	23.8079	5	2	5	4	3.04364	3.07404	4.69511	5.85299	5	26.6193	7	4.01731	32.3841	6.26533	4.9925	2.4285	8.8645	5.78263	635.35	472.627	162.723	25.6116	37.8665	9.8156	47.6821	19.9617	26.9773	1.62673	4.40623	2.05934	4.51596	3.00721	6.5904	4.30101	7.49419	23.5461	29.4047	2.57876	5.26355	12.2801	48.445	573.162	711.365	418.344	519.952	109.478	204.667
2017	23	23.9496	2	4	7	2	2.5472	2.86856	4.48924	5.71956	5	26.9844	4	4.15852	36.0965	6.51952	5.2075	2.5415	9.2225	5.78554	670.263	495.577	174.687	26.0624	40.0495	10.2556	50.3051	18.9529	28.5319	1.06204	4.12959	1.66227	4.33425	2.73607	6.1843	3.30188	8.01237	24.2643	29.8152	2.53249	5.74551	9.96521	60.9967	589.318	752.447	442.188	544.177	103.99	227.65
2018	21	24.4213	4	1	1	13	2.8139	3.66483	5.8923	7.67511	3	27.4269	2	4.37517	40.5161	6.79649	5.4425	2.6665	9.6115	5.75473	710.587	519.998	190.589	26.8213	43.0577	10.8908	53.9485	17.1127	30.9082	7.8e-05	4.93952	2.0627	5.81319	3.54924	9.00192	5.19832	9.91726	24.0465	30.4678	2.33413	6.38479	5.47892	75.7948	598.042	812.038	468.592	569.005	95.3164	268.049
[truncated: 26 more columns]

## Sheet: PWID_CD4proxy
year	N_HIV_D	N_HIV_Obs_M	N_CD4_1_D	N_CD4_2_D	N_CD4_3_D	N_CD4_4_D	N_CD4_1_Obs_M	N_CD4_2_Obs_M	N_CD4_3_Obs_M	N_CD4_4_Obs_M	N_AIDS_D	N_AIDS_M	N_HIVAIDS_D	N_HIVAIDS_Obs_M	N_Inf_M	t_diag	t_diag_p50	t_diag_p25	t_diag_p75	D_Avg_Time	N_Alive	N_Alive_Diag_M	N_Und	N_Und_Alive_p	N_Und_CD4_3_M	N_Und_CD4_4_M	N_Und_CD4_3p4_M	N_HIV_Obs_M_LB	N_HIV_Obs_M_UB	N_CD4_1_Obs_M_LB	N_CD4_1_Obs_M_UB	N_CD4_2_Obs_M_LB	N_CD4_2_Obs_M_UB	N_CD4_3_Obs_M_LB	N_CD4_3_Obs_M_UB	N_CD4_4_Obs_M_LB	N_CD4_4_Obs_M_UB	N_AIDS_M_LB	N_AIDS_M_UB	N_HIVAIDS_Obs_M_LB	N_HIVAIDS_Obs_M_UB	N_Inf_M_LB	N_Inf_M_UB	N_Alive_LB	N_Alive_UB	N_Alive_Diag_M_LB	N_Alive_Diag_M_UB	N_Und_LB	N_Und_UB
1980	0	0.005508	0	0	0	0	0	0	0	0	0	0.005508	0	0.005508	2.56514	11.5671	10.8755	6.3895	17.2385	0.5	2.56489	0.005508	2.55938	99.7853	0.27664	0.063599	0.340239	0.003056	0.008773	0	0	0	0	0	0	0	0	0.003056	0.008773	0.003056	0.008773	1.47496	4.01449	1.47482	4.0141	0.003056	0.008773	1.47177	4.00533
1981	0	0.07158	0	0	0	0	0	0	0	0	0	0.07158	0	0.07158	7.25183	11.5671	10.8755	6.3895	17.2385	1.14042	9.81356	0.077088	9.73647	99.2145	1.40007	0.379289	1.77936	0.042169	0.110636	0	0	0	0	0	0	0	0	0.042169	0.110636	0.042169	0.110636	4.64446	10.6966	6.11742	14.7058	0.045225	0.119408	6.0722	14.5864
1982	0	0.263069	0	0	0	0	0	0	0	0	0	0.263069	0	0.263069	11.2555	11.5671	10.8755	6.3895	17.2385	1.63395	21.0574	0.340158	20.7173	98.3846	3.41655	1.05207	4.46862	0.164821	0.393068	0	0	0	0	0	0	0	0	0.164821	0.393068	0.164821	0.393068	7.98886	15.5292	14.099	30.2176	0.210046	0.512476	13.889	29.7052
1983	0	0.61426	0	0	0	0	0	0	0	0	0	0.61426	0	0.61426	14.5525	11.5671	10.8755	6.3895	17.2385	2.11645	35.5828	0.954417	34.6284	97.3178	6.26008	2.13681	8.39689	0.407548	0.886599	0	0	0	0	0	0	0	0	0.407548	0.886599	0.407548	0.886599	11.3022	19.4795	25.3832	48.9253	0.617594	1.39908	24.7656	47.5852
1984	1	0.030615	0	0	0	0	0	0	0	0	0	1.16738	0	1.01744	17.1193	17.3305	0.0005	0.0005	0.0005	28.9118	52.6572	0.985033	51.6722	98.1294	10.2443	2.97593	13.2202	0.028073	9.51818	0	0	0	0	0	0	0	0	0.816452	1.64452	0.711371	1.41842	15.0763	21.4341	39.7304	71.4556	0.860505	10.8508	39.0898	64.9484
1985	80	0.000673	0	0	0	0	0	0	0	0	1	1.87802	1	1.45344	18.9323	17.3305	0.0005	0.0005	0.0005	1953.27	70.5255	-0.014295	70.5398	100.02	15.0189	4.26999	19.2889	0	11.5982	0	0	0	0	0	0	0	0	1.3783	2.626	1.07052	1.84383	17.0119	22.7572	55.9655	93.0183	-0.101381	21.4489	56.0545	86.3693
1986	104	0.213168	0	0	0	0	0	0	0	0	0	2.74416	0	2.05296	19.968	17.3305	0.0005	0.0005	0.0005	12.7615	86.403	-3.80113	90.2041	104.399	20.3997	5.89098	26.2906	0.197185	13.6567	0	0	0	0	0	0	0	0	2.10473	3.71316	1.49862	2.54983	17.4325	23.53	74.8703	110.373	-3.9042	31.1056	68.07	108.016
1987	66	56.5266	0	0	0	0	0	0	0	0	2	3.91089	1	1.95405	20.2028	1.40258	1.0815	0.5745	1.8955	3.33724	94.5196	40.7255	53.7941	56.9131	11.8172	3.42126	15.2385	46.5191	66.665	0	0	0	0	0	0	0	0	3.18644	5.12961	1.32212	2.39444	17.9324	23.3773	82.3388	121.482	33.3918	70.9321	41.3944	62.6271
1988	31	35.1423	0	0	0	0	0	0	0	0	1	5.02762	0	1.18157	19.6332	1.40258	1.0815	0.5745	1.8955	3.27882	108.101	69.8678	38.2329	35.3678	7.78147	2.19006	9.97153	30.5274	39.4523	0	0	0	0	0	0	0	0	4.40074	6.35168	0.771159	1.42577	16.8799	22.6056	95.1633	137.566	59.0118	100.13	31.0133	42.8218
1989	26	25.7591	0	0	0	0	0	0	0	0	4	6.16513	0	0.792217	18.3829	1.40258	1.0815	0.5745	1.8955	2.92566	119.449	88.6268	30.8218	25.8034	5.83495	1.58072	7.41567	22.5606	28.2664	0	0	0	0	0	0	0	0	5.48856	7.6584	0.531728	0.938523	15.3255	21.6894	105.118	148.333	76.4638	118.713	25.8057	34.8859
1990	22	21.0711	0	0	0	0	0	0	0	0	12	7.28218	2	0.595864	16.658	1.40258	1.0815	0.5745	1.8955	2.57262	124.08	97.698	26.3824	21.2623	4.77966	1.25711	6.03677	18.0699	23.2336	0	0	0	0	0	0	0	0	6.57577	8.94288	0.430082	0.718282	13.5879	19.9843	106.302	151.984	83.8245	127.647	20.9615	30.3511
1991	13	18.0932	0	0	0	0	0	0	0	0	14	8.32633	0	0.485785	14.6683	1.40258	1.0815	0.5745	1.8955	2.34611	125.727	102.791	22.936	18.2427	4.07722	1.0551	5.13232	15.1717	20.3371	0	0	0	0	0	0	0	0	7.49341	9.9904	0.366411	0.583159	11.9263	17.6105	104.844	153.297	85.6727	133.202	17.7651	26.4663
1992	12	15.6979	0	0	0	0	0	0	0	0	8	9.25316	0	0.411714	12.6238	1.40258	1.0815	0.5745	1.8955	2.23399	127.333	107.489	19.8438	15.5842	3.51088	0.90269	4.41357	13.0245	18.0508	0	0	0	0	0	0	0	0	8.28351	10.8449	0.311609	0.504346	10.306	14.9379	103.814	158.666	87.3467	137.78	15.1538	22.9777
1993	13	13.5418	0	0	0	0	0	0	0	0	13	10.0296	0	0.352719	10.7344	1.40258	1.0815	0.5745	1.8955	2.19111	122.052	105.031	17.0208	13.9456	3.01304	0.773556	3.78659	11.2195	15.6648	0	0	0	0	0	0	0	0	8.87382	11.5523	0.262148	0.43946	8.84448	12.4112	96.4405	158.437	82.2356	137.859	12.9663	19.7528
1994	12	11.6087	0	0	0	0	0	0	0	0	19	10.6364	0	0.302115	9.21	1.40258	1.0815	0.5745	1.8955	2.17809	115.248	100.64	14.6088	12.676	2.58272	0.662802	3.24553	9.63746	13.3381	0	0	0	0	0	0	0	0	9.31884	12.4509	0.223315	0.378129	7.7277	10.3863	88.1081	152.683	75.6592	136.523	11.261	16.9411
1995	11	10.0164	0	0	0	0	0	0	0	0	7	11.0696	0	0.259807	8.26018	1.40258	1.0815	0.5745	1.8955	2.1624	105.497	92.656	12.8411	12.172	2.2479	0.575224	2.82312	8.41068	11.1885	0	0	0	0	0	0	0	0	9.66224	13.0063	0.193777	0.322176	7.25843	9.33085	78.0194	143.179	65.9982	129.248	10.1802	14.7268
1996	9	8.80953	0	0	0	0	0	0	0	0	11	11.3414	1	0.227682	8.03372	1.40258	1.0815	0.5745	1.8955	2.11989	102.521	90.4655	12.0553	11.7588	2.07394	0.512708	2.58664	7.63863	9.83633	0	0	0	0	0	0	0	0	10.006	13.2293	0.168205	0.276216	7.19405	9.22976	75.0041	140.22	62.8476	127.525	9.9158	13.8839
1997	10	8.20003	0	0	0	0	0	0	0	0	8	11.4782	0	0.20762	8.44689	1.44756	1.1135	0.5895	1.9575	2.04419	100.958	88.6655	12.293	12.1763	2.07997	0.486231	2.5662	7.35467	9.29916	0	0	0	0	0	0	0	0	10.2261	13.2893	0.131334	0.25016	7.38636	9.84548	73.4178	138.465	61.0318	125.944	9.96303	14.4389
1998	8	8.23577	0	0	0	0	0	0	0	0	4	11.5151	0	0.203112	9.31945	1.49645	1.1475	0.6045	2.0255	1.968	101.269	87.9013	13.3677	13.2002	2.23964	0.495755	2.7354	7.33281	9.47638	0	0	0	0	0	0	0	0	10.3454	13.2245	0.110027	0.258483	7.94824	11.1159	73.7149	138.388	60.2602	125.156	10.5964	15.9198
1999	12	8.73653	0	0	0	0	0	0	0	0	7	11.4908	0	0.212215	10.469	1.54974	1.1855	0.6225	2.0995	1.91719	102.729	87.6378	15.0908	14.69	2.52809	0.532963	3.06105	7.57093	10.2371	0	0	0	0	0	0	0	0	10.2954	13.0785	0.115422	0.284578	8.85873	12.6942	75.1685	139.274	59.995	124.658	11.573	18.3163
2000	6	9.53142	0	0	0	0	0	0	0	0	5	11.4418	0	0.231248	11.7132	1.60803	1.2265	0.6405	2.1805	1.90117	103.432	86.1692	17.2624	16.6897	2.91843	0.588748	3.50718	8.15212	11.4127	0	0	0	0	0	0	0	0	10.2418	12.8917	0.115565	0.314166	9.97406	14.3199	75.8701	139.227	58.5305	122.771	12.9515	21.2111
2001	7	10.4575	0	0	0	0	0	0	0	0	8	11.3994	1	0.256459	12.8696	1.67201	1.2715	0.6615	2.2695	1.91788	109.29	89.6267	19.6632	17.9918	3.37957	0.654256	4.03383	8.94132	12.6803	0	0	0	0	0	0	0	0	10.2121	12.6986	0.116243	0.352288	11.0261	15.7793	82.0996	144.16	61.9981	125.642	14.5494	24.3304
2002	14	11.3585	0	0	0	0	0	0	0	0	4	11.3862	0	0.284197	13.7559	1.7425	1.3215	0.6835	2.3685	1.96214	115.033	92.9853	22.0481	19.1667	3.87447	0.720797	4.59527	9.81044	13.8622	0	0	0	0	0	0	0	0	10.2252	12.6338	0.118321	0.405202	11.8174	16.8648	87.7233	152.777	65.3723	128.259	16.1691	27.383
2003	11	12.0852	0	0	0	0	0	0	0	0	6	11.4139	0	0.310837	14.1914	1.82053	1.3775	0.7075	2.4775	2.03034	125.211	101.07	24.1405	19.2799	4.35847	0.77962	5.13809	10.6221	14.7889	0	0	0	0	0	0	0	0	10.2901	12.7349	0.120127	0.459266	12.2465	17.3707	97.6559	166.004	73.4989	135.965	17.5953	30.0388
2004	15	12.503	0	1	1	0	0.764978	0.366009	0.315058	0.176651	4	11.4821	0	0.332807	14.0722	1.9073	1.4395	0.7355	2.6005	2.12141	138.269	112.573	25.6951	18.5834	4.78423	0.822888	5.60712	11.0032	15.3084	0	2.09112	0	0.980519	0	0.832006	0	0.463253	10.4558	12.8289	0.120557	0.509564	12.1786	17.1823	110.841	178.01	85.6966	150.031	19.374	32.0002
2005	19	12.5406	3	2	1	1	2.08229	1.00736	0.878311	0.524245	4	11.5793	0	0.347521	13.4799	2.00432	1.5085	0.7655	2.7375	2.23343	149.733	123.114	26.619	17.7776	5.12202	0.847074	5.96909	10.9223	15.343	0.470713	4.10421	0.234326	2.04314	0.19787	1.7157	0.118567	1.06822	10.6443	13.0448	0.119164	0.551825	11.6203	16.7941	122.425	191.079	96.0224	163.115	19.9688	33.1893
2006	7	12.2133	2	1	0	1	3.08098	1.50888	1.33475	0.852005	4	11.6873	0	0.354277	12.544	2.11344	1.5875	0.7995	2.8925	2.36361	161.262	134.327	26.934	16.7021	5.36233	0.85266	6.215	10.7842	14.936	1.06877	5.03846	0.504827	2.41156	0.459304	2.24257	0.272092	1.50576	10.7558	13.2577	0.116084	0.583873	10.7178	16.0163	133.686	204.721	106.808	176.759	19.9638	34.2626
2007	13	11.5858	3	1	2	2	3.07443	1.52572	1.37082	0.941111	0	11.7848	0	0.353721	11.3948	2.23701	1.6775	0.8385	3.0685	2.51053	169.641	142.913	26.7274	15.7553	5.50961	0.842426	6.35203	10.1398	14.3127	1.59266	4.41235	0.785098	2.20752	0.719424	1.95768	0.502289	1.36945	10.862	13.4527	0.11166	0.605406	9.40831	14.9087	142.015	214.857	115.408	185.21	19.6691	34.9661
2008	11	10.7438	2	0	1	0	1.35335	0.681128	0.62197	0.462504	2	11.8513	1	0.347261	10.1624	2.37798	1.7815	0.8825	3.2695	2.67377	176.788	150.657	26.1307	14.7808	5.57867	0.820466	6.39914	9.18934	13.5129	0	3.11614	0	1.48307	0	1.33613	0	1.00311	10.821	13.5517	0.106278	0.617448	8.30969	13.4347	149.063	223.346	123.149	192.792	19.2899	35.0745
2009	10	9.77913	3	2	1	3	3.9841	2.03497	1.88861	1.53469	2	11.8694	1	0.336762	8.97669	2.54019	1.9015	0.9335	3.5025	2.85255	182.75	157.436	25.3134	13.8514	5.59371	0.791747	6.38546	8.07793	12.5066	3.3975	5.09112	1.70902	2.62963	1.5776	2.43922	1.0398	2.12617	10.786	13.6065	0.099989	0.622036	6.77324	12.3396	155.677	230.19	131.164	201.708	18.5709	35.0625
2010	9	8.78251	2	0	2	0	2.30532	1.19541	1.1264	1.01159	3	11.8268	3	0.324426	7.96792	2.72862	2.0435	0.9945	3.7725	3.04376	190.703	166.219	24.4845	12.8391	5.58882	0.761987	6.35081	7.32377	11.3718	1.23493	4.02545	0.717012	2.11601	0.619437	1.99138	0.329661	1.77888	10.7927	13.6835	0.093065	0.62211	5.71432	11.3047	163.217	238.799	141.931	212.327	17.7459	34.2687
2011	8	7.83781	0	0	0	3	1.11371	0.586091	0.559065	0.563023	0	11.7189	0	0.31277	7.26356	2.94997	2.2125	1.0655	4.0915	3.23947	196.953	173.057	23.8965	12.1331	5.60977	0.737701	6.34747	6.55952	10.2723	0	2.73213	0	1.27396	0	1.2604	0	1.34852	10.8009	13.5746	0.086696	0.621556	5.01141	10.4429	168.803	247.429	149.766	220.678	17.2035	34.0353
2012	6	7.01417	1	2	1	1	2.54659	1.35824	1.30389	1.50087	1	11.549	1	0.304584	6.93797	3.21331	2.4155	1.1525	4.4725	3.42584	203.878	180.071	23.8069	11.677	5.71158	0.725563	6.43714	5.48017	9.32575	1.90562	3.61635	1.02423	1.92926	1.04811	1.77625	1.04975	2.176	10.6433	13.3664	0.081346	0.62525	4.7443	9.83575	174.777	256.488	156.549	228.886	17.3109	34.8563
2013	7	6.34751	1	1	1	1	1.2549	0.677086	0.647952	0.874368	1	11.3278	0	0.302472	6.98326	3.53131	2.6665	1.2605	4.9325	3.58914	210.847	186.418	24.4293	11.5862	5.94977	0.731184	6.68095	4.81197	8.42816	0	2.60436	0	1.32802	0	1.35528	0	1.80198	10.5072	13.2128	0.077321	0.638485	4.58432	10.9684	182.989	263.747	162.918	236.125	17.5028	35.5825
2014	4	5.83599	1	1	1	0	1.43014	0.779652	0.733643	1.20208	0	11.0718	0	0.308634	7.37854	3.92212	2.9805	1.3985	5.4985	3.72274	218.212	192.254	25.9582	11.8959	6.38152	0.759548	7.14107	4.52395	7.80224	0	2.35489	0	1.35792	0	1.34489	0	2.0453	10.1343	13.0102	0.074781	0.661896	3.78751	12.8492	191.96	269.647	168.983	242.586	16.8963	38.199
2015	7	5.44946	0	0	0	7	1.65339	0.911543	0.826519	1.73285	0	10.8014	0	0.325149	8.10291	4.41263	3.3845	1.5795	6.2095	3.83018	226.301	197.704	28.5973	12.6369	7.07134	0.815781	7.88712	3.87528	7.58719	1.00113	2.86395	0.473445	1.45309	0.447845	1.32498	0.986286	2.59682	9.73156	12.7226	0.073822	0.682499	3.07547	16.4035	198.145	275.2	174.256	247.802	15.6291	43.6479
2016	7	5.13446	4	1	0	3	1.86491	1.04526	0.881307	2.58211	2	10.5393	1	0.354268	9.1355	5.04422	3.9175	1.8275	7.1225	3.92614	235.421	202.838	32.5828	13.8402	8.09744	0.905809	9.00325	3.41406	7.4869	0.500011	2.64691	0.247368	1.43384	0.217269	1.21598	0.953909	2.70888	9.39759	12.3627	0.074521	0.722354	2.31408	20.8304	201.271	284.463	178.908	252.075	14.429	51.5789
2017	4	4.81412	0	0	2	3	1.36754	0.791304	0.568046	2.79237	0	10.3092	0	0.3987	10.4554	5.88369	4.6485	2.1845	8.3285	4.03573	244.859	206.652	38.2065	15.6035	9.55962	1.03705	10.5967	2.66603	7.2093	0	2.35526	0	1.45654	0	1.1341	0	3.28036	9.17575	12.1423	0.076968	0.896555	1.44729	25.8866	204.427	304.91	182.032	255.326	13.2262	68.6169
2018	4	4.38372	1	1	0	0	0.338403	0.213451	0.083774	1.32528	0	10.1346	0	0.461911	12.0417	7.04554	5.6915	2.7345	9.9775	4.19675	256.88	211.036	45.8441	17.8465	11.5896	1.21927	12.8088	1.97664	7.03306	0	1.17241	0	0.935533	0	0.491741	0	2.93079	8.81532	12.392	0.081291	1.05505	0.505737	31.6124	206.388	327.481	185.551	259.698	11.9253	91.509
[truncated: 26 more columns]
